# Supplementary material for: Study on the relationship between net primary productivity and site quality in Japanese larch plantations in mountainous areas of eastern Liaoning
Source: PeerJ. 2024 Aug 6;12:e17820. doi: 10.7717/peerj.17820 (PMC11313427; doi:10.7717/peerj.17820)
Supplement: Supplemental Information 4 [file peerj-12-17820-s004.xlsx]

## Sheet: Sheet1
F2013	F2014	F2015	F2016	F2017	F2018	F2019	F2020	F2021	F2022	AGE	height	SI	SI	average npp
5690	5540	5223	5744	6186	5809	5681	6331	6309	5997	26	14.6	16.077	16	5851
5193	4058	4049	3857	3945	4507	4571	4597	4584	4758	19	10.4	14.7896	14	4411.9
5584	5486	5316	5875	6146	6131	5887	5888	6070	6704	24	13.5	15.7775	16	5908.7
5250	5047	4820	5094	5130	5457	5106	5394	5673	5773	20	10	13.6297	14	5274.4
5242	5334	5366	5567	5742	5718	5518	6007	5746	5987	24	12.7	14.8587	14	5622.7
5517	5082	5652	5469	5993	6115	6166	6189	6526	5580	11	5.4	13.5563	14	5828.9
5674	5530	5520	5593	5391	5982	5882	6130	6447	6497	26	15	16.5125	16	5864.6
5540	5194	5116	5326	5585	5463	5711	6144	6082	5890	16	7.4	12.4932	12	5605.1
4607	5437	5062	5654	5638	6296	6096	6020	6047	6526	70	18.7	13.5153	14	5738.3
5658	5528	5616	5622	5606	6068	6117	6091	6437	6561	23	10.4	12.6246	12	5930.4
6058	5630	5704	5360	6028	5785	5866	6162	6098	6856	14	8.3	15.8003	16	5954.7
5817	5680	5670	5704	6062	5990	5770	5917	6390	6618	21	8.9	11.6837	12	5961.8
5348	5231	5088	5295	5002	5471	5552	5506	6027	5959	22	10.8	13.572	14	5447.9
5846	5326	5324	5882	5836	6041	5596	6211	5680	6127	20	11	14.9438	14	5786.9
5253	4892	4949	5012	5142	5598	5342	5437	5594	5822	22	14.3	17.8423	18	5304.1
5389	4430	4473	4506	4740	5301	5102	5885	5983	6008	27	11.2	12.0376	12	5181.7
5658	5386	5388	5381	5388	5829	5797	6076	6430	6277	15	13.5	23.3401	24	5761
4730	4691	4535	4858	4662	5103	5045	5262	4845	5256	21	9	11.811	12	4898.7
5501	5616	5393	5583	5825	5827	5809	6134	5988	6043	21	17.8	22.8909	22	5771.9
5661	5252	5225	5310	5364	5935	5741	6035	6170	5792	22	9.4	11.8546	12	5648.5
5553	5370	5504	5413	5523	5930	5959	6116	6357	6351	23	10.4	12.6246	12	5807.6
5387	4918	4889	5470	5426	5394	5103	5967	6402	6022	24	10.4	12.2112	12	5497.8
4948	5221	5214	5269	5310	5319	5627	6106	5936	6086	18	12.1	17.916	18	5503.6
4822	4986	5195	5045	4830	5400	5691	5722	5829	5810	16	10.1	16.7568	16	5333
6279	5855	5740	6064	6258	6195	5685	6306	6400	6040	14	7.7	14.735	14	6082.2
5442	5642	5278	5675	5688	6057	5802	6007	5760	6122	22	15	18.6929	18	5747.3
4596	4533	4346	4618	4572	4786	4846	5102	4902	5267	14	14.1	25.8673	26	4756.8
4847	5220	5378	5445	5427	5861	5722	6240	6163	6126	28	13.4	14.0257	14	5642.9
4875	4669	4805	4786	4962	5121	5084	5525	5490	5687	24	10.4	12.2112	12	5100.4
5615	5369	5622	5437	5313	6082	6066	6297	6093	6217	26	11.4	12.5879	12	5811.1
5133	4804	4958	5060	5114	5414	5354	5587	5592	5286	44	15.4	12.5904	12	5230.2
5541	5767	5929	6451	6180	6772	5950	6119	7110	7212	18	10.1	15.075	16	6303.1
6322	6058	6296	6062	5976	6564	6487	6629	6725	7065	13	8.8	17.9147	18	6418.4
4948	5329	5382	5886	5929	5356	5685	6088	6084	6445	13	8.8	17.9147	18	5713.2
5281	5080	4966	5320	5116	5274	5461	5632	5699	5699	22	13.4	16.7471	16	5352.8
5760	5379	5750	5557	5707	6227	5522	6000	6219	6418	23	12	14.522	14	5853.9
5864	5710	5619	5612	5836	6242	6010	6200	6133	6258	11	3.7	9.62934	10	5948.4
6354	5289	5578	5427	5685	5543	6148	6314	6326	6492	26	8.8	9.74497	10	5915.6
5974	5834	5949	5898	5988	6377	6122	6274	6729	6736	19	13.6	19.1384	20	6188.1
5368	5062	5211	5350	5037	5433	5334	5717	5312	5798	22	11.3	14.184	14	5362.2
5724	5556	5382	5812	5991	5932	5813	5921	6397	6357	31	11.7	11.4553	12	5888.5
5306	5648	5649	5699	5629	6268	6098	6361	6409	6374	19	19.3	26.7903	26	5944.1
5421	4038	4301	4539	4741	5229	4747	5601	5964	6087	26	15	16.5125	16	5066.8
5452	5082	5285	5448	5617	5628	5647	5668	5362	5799	21	9	11.811	12	5498.8
5350	5220	5378	5445	5427	5861	5722	6240	6163	6126	18	13.2	19.4694	20	5693.2
4798	4754	4826	5054	4834	5423	5352	5307	5938	6035	16	16	25.8696	26	5232.1
4849	5116	5253	5493	5386	5642	5902	5958	6119	5863	24	12.5	14.6289	14	5558.1
5527	5430	5202	5255	5255	5642	5538	5403	5987	6068	17	12.2	18.9796	18	5530.7
5648	5345	5215	5652	6166	5842	5805	6051	6082	6274	17	13.4	20.7489	20	5808
5189	5530	5520	5593	5391	5982	5882	6130	6447	6497	26	11.4	12.5879	12	5816.1
5997	5835	5998	6018	6014	6434	6423	6723	6979	7085	24	13	15.2034	16	6350.6
4831	4407	4379	4678	4288	4723	4961	4629	5171	4899	23	14.4	17.3582	18	4696.6
5300	4642	4937	5394	5279	5898	5329	5750	6044	6491	16	9.2	15.3437	16	5506.4
5233	5156	5144	5058	5149	5616	5673	5703	5913	5713	25	11.4	12.9574	12	5435.8
5170	4651	4979	5127	4901	5432	5425	5892	5952	5619	19	10	14.2426	14	5314.8
4902	4710	4613	4873	4629	5261	5087	5257	4994	5456	20	12.8	17.2991	18	4978.2
5907	5826	5494	5389	5714	5963	6298	6331	6342	6139	13	7.1	14.6965	14	5940.3
5090	5134	5294	5482	5264	5882	5823	6107	6134	5937	23	12	14.522	14	5614.7
5447	5093	4990	4786	4891	5566	5355	5349	5392	5638	23	7.8	9.52728	10	5250.7
5930	5419	5329	5425	5510	5885	6139	6094	6415	6398	21	17	21.892	22	5854.4
5946	5658	5582	5480	5994	6020	6059	6462	6297	6318	16	10.1	16.7568	16	5981.6
5345	4667	4749	4764	4873	5231	5108	5245	5210	5444	19	10	14.2426	14	5063.6
6168	6005	6152	6100	6168	6195	6046	6557	6760	6659	19	14	19.679	20	6281
4979	4934	5014	5466	5482	5587	5774	5960	6107	5980	17	14.5	22.3638	22	5528.3
5110	6121	6046	6066	6342	6390	6458	6570	7008	6821	12	4.1	9.63392	10	6293.2
5683	5485	5562	5586	5639	5962	5736	6051	5839	6266	39	18.4	15.93	16	5780.9
4634	5084	5522	5239	5153	5587	5705	5757	5661	5743	40	19.8	16.9631	16	5408.5
5684	4419	4885	5604	5127	6149	5229	6130	5999	6383	22	14.6	18.207	18	5560.9
5765	4546	4825	5462	4964	5879	5384	5923	6038	6502	26	15.6	17.1655	18	5528.8
5090	5050	4937	5088	4916	5522	5488	5562	5794	5654	22	12	15.0396	16	5310.1
5530	5412	5191	5530	5593	5701	5043	5751	5860	6174	20	8.4	11.5175	12	5578.5
5954	5702	5715	6070	6045	6374	6367	6831	6537	6466	18	7.9	11.9205	12	6206.1
5173	4821	4801	5059	5090	4890	5097	5452	5449	5636	14	10.2	19.14	20	5146.8
5917	5913	6002	6010	6070	6341	6413	6439	6615	6757	16	10.8	17.8509	18	6247.7
4850	4799	4412	4659	4457	4628	4887	4840	4716	5296	20	15.9	21.3297	22	4754.4
4778	4335	4340	4381	4219	4570	4304	4432	4567	4296	24	14	16.3513	16	4422.2
5195	5014	5253	5353	5421	5333	5476	5775	5954	6135	16	10.8	17.8509	18	5490.9
4362	3992	3966	4043	3753	4398	3990	4316	4389	4574	39	14.4	12.4148	12	4178.3
5774	5715	5577	6192	5848	5750	5822	5621	6045	6573	23	15.1	18.1834	18	5891.7
5466	5472	5558	5756	5754	6014	5235	6228	6418	6140	51	14.4	11.1253	12	5804.1
5146	5082	5005	5318	5181	5499	5601	5819	5791	5774	16	10.8	17.8509	18	5421.6
5516	4255	4647	4726	4568	5539	5006	5930	6078	5988	43	15.2	12.544	12	5225.3
5854	6018	5858	5501	5674	6033	6108	6507	6427	6467	24	12.7	14.8587	14	6044.7
5209	5114	4917	5100	5139	5392	5556	5578	6007	6062	45	17.6	14.3047	14	5407.4
5779	5345	5215	5652	6166	5842	5805	6051	6082	6274	17	10.6	16.6067	16	5821.1
5024	4530	4727	4778	4817	5332	5328	5560	5486	5652	40	14.9	12.6982	12	5123.4
5543	5496	5449	5464	5593	5341	5841	5920	6110	6142	20	9.2	12.5752	12	5689.9
5445	5342	5369	5671	5793	5962	5921	6339	5990	6217	24	11.2	13.1332	14	5804.9
5719	5715	5639	5649	5590	5932	5577	6280	5742	6532	20	10	13.6297	14	5837.5
5004	5060	5345	5503	5485	5760	5650	5789	6058	6284	19	14.1	19.814	20	5593.8
5331	5240	5278	5525	5271	5846	5570	6064	5907	5769	23	15.4	18.5368	18	5580.1
5869	5806	5732	5754	5496	6206	6034	6500	6674	6758	16	10	16.6001	16	6082.9
5287	5733	5696	5538	5803	6102	5848	5965	6262	6390	17	12.4	19.275	20	5862.4
5599	5462	5574	5351	5520	6015	6005	6033	6122	6238	39	18.5	16.0181	16	5791.9
5970	5289	5578	5427	5685	5543	6148	6314	6326	6492	26	13.9	15.3145	16	5877.2
4478	4575	4962	4660	4709	5162	5069	5000	5280	5055	24	8.8	10.3634	10	4895
6354	6040	6042	5990	5797	6581	6335	6567	6594	6831	26	12.4	13.6793	14	6313.1
5524	5131	5299	5362	5212	5758	5838	5952	5804	5983	23	10.4	12.6246	12	5586.3
5470	5174	5310	5438	5644	5747	5631	5796	5702	5869	23	12	14.522	14	5578.1
4542	4438	4602	4467	4310	4429	4780	5243	5393	5046	26	15	16.5125	16	4725
5425	5864	5976	5932	6026	6074	6477	6643	6666	6651	24	12.5	14.6289	14	6173.4
5871	5782	5519	5629	6052	6454	5809	6053	5725	6286	26	12.8	14.1155	14	5918
6158	6071	5937	6058	5926	6407	6365	6609	6799	6764	44	14.9	12.1722	12	6309.4
5664	5746	5625	5917	6174	6019	6000	5988	6498	5833	18	14.8	21.7189	22	5946.4
5475	5150	5082	5304	5376	5658	5579	5961	5899	5883	28	13.7	14.3381	14	5536.7
5105	5220	5378	5445	5427	5861	5722	6240	6163	6126	24	14	16.3513	16	5668.7
5665	4986	4958	5157	5758	5765	5579	5830	6206	6576	21	12	15.614	16	5648
4622	4571	4674	4610	4694	5188	5211	5511	5271	5414	24	11.6	13.5937	14	4976.6
4548	5766	5294	5738	5952	5990	5726	5831	6042	6420	17	10.1	15.8616	16	5730.7
4394	4759	4896	4867	4895	5207	5219	5506	5523	5665	24	13	15.2034	16	5093.1
5699	6266	6316	6402	6505	6531	6505	6750	6910	6818	20	12.5	16.9074	16	6470.2
5638	5251	5342	5732	5713	6136	5833	6079	6239	6185	16	10.8	17.8509	18	5814.8
4784	4698	4909	5242	5460	5624	5287	5540	5722	5907	14	10.2	19.14	20	5317.3
3826	4648	4880	4961	4726	5139	5193	5297	5475	5496	12	7.1	15.9136	16	4964.1
5463	5178	5483	5561	5563	5778	5742	6152	6204	6265	22	12	15.0396	16	5738.9
5837	5658	5760	5631	5886	6198	5814	6082	6373	6613	18	11.5	17.066	18	5985.2
5038	5151	4940	5300	5175	5584	5484	5727	5850	5839	18	12	17.7745	18	5408.8
5290	4375	4626	4782	4757	5011	4838	5156	5384	5054	18	13.8	20.3143	20	4927.3
5906	4690	4854	5491	5337	5625	5160	5607	5696	6293	17	9.8	15.4137	16	5465.9
5817	5311	5132	5234	5464	5318	5511	5703	5998	5530	28	8.7	9.12681	10	5501.8
5117	4753	4984	4988	4948	5558	5267	5628	5576	5562	14	6.2	12.0453	12	5238.1
5806	5020	5060	5270	5173	5533	5434	5507	5657	5410	24	11.4	13.3635	14	5387
5187	4780	5078	5145	5304	5453	5041	5441	5807	5797	16	7.6	12.8117	12	5303.3
5640	5237	5270	5600	5520	5882	4990	6157	5886	5645	21	9.4	12.32	12	5582.7
5665	4849	5406	5354	5477	5551	5789	5697	6017	6062	23	14.6	17.594	18	5586.7
5490	5561	5734	5681	5667	6110	5819	6434	6392	6429	21	12	15.614	16	5931.7
4696	4630	4797	4832	4855	5060	4837	5381	5270	5082	14	10.2	19.14	20	4944
5322	5161	5312	5145	5113	5967	5726	5978	5848	5881	27	16.2	17.3596	18	5545.3
4382	4818	4822	4887	4612	5034	5128	5402	5306	5300	38	15.4	13.4637	14	4969.1
5475	4818	4905	5038	5298	5447	5224	5711	5610	5723	23	13.7	16.5321	16	5324.9
5562	5110	5301	5278	5393	5950	5835	5820	5909	5864	20	10.8	14.6813	14	5602.2
5687	4870	4616	4717	4786	5190	5532	5637	5591	5771	41	17.5	14.7908	14	5239.7
5521	5054	4841	5052	5297	5382	5510	5682	5541	5674	21	8.8	11.5563	12	5355.4
4668	4983	4949	5264	5146	5846	5409	5762	5917	5840	21	11	14.3499	14	5378.4
5525	5234	5542	5538	5492	5813	5975	6332	6418	6297	21	11.6	15.1087	16	5816.6
4890	4782	4552	4987	5078	5077	5502	5640	5693	5807	21	9.4	12.32	12	5200.8
5267	5361	5469	5572	6009	6119	5612	5573	6132	6133	23	10.4	12.6246	12	5724.7
5898	5674	5567	5838	6037	6129	6033	6464	6433	6217	17	13.4	20.7489	20	6029
5719	5494	5334	5419	5562	5496	5791	5991	5985	6561	20	14.7	19.773	20	5735.2
5081	5154	4942	4956	5281	5646	5134	5668	5623	5886	12	5.4	12.3916	12	5337.1
5494	5134	5557	5622	6022	6074	5905	5680	5999	6134	14	10.4	19.4889	20	5762.1
5714	5734	5585	5371	5786	5708	5550	5795	6210	6258	16	11	18.1628	18	5771.1
5767	5576	5404	5920	5645	5655	5978	5983	5972	6179	20	9.2	12.5752	12	5807.9
5129	4603	4824	4882	4829	5408	5359	5523	5568	5902	24	15.6	18.1849	18	5202.7
5936	5081	5198	5561	5451	5836	5576	6246	6389	6287	15	9.9	17.4518	18	5756.1
5267	4779	4780	5094	4867	5306	5400	5365	5444	5259	18	11.2	16.6403	16	5156.1
5497	4735	5162	5426	5387	5768	5611	5383	6062	6040	16	15.5	25.1058	26	5507.1
4680	4488	4839	4870	5022	4887	5183	5509	5481	5482	15	10.9	19.0992	20	5044.1
5302	5186	4925	5570	5524	5720	5940	6184	6008	5731	20	13.1	17.6905	18	5609
6261	5480	5516	5713	5548	6108	5710	6339	6533	5818	11	5.4	13.5563	14	5902.6
5622	5598	5753	5572	5637	5992	5938	6550	6747	6611	19	10.4	14.7896	14	6002
5829	5106	4661	5012	5256	5269	4892	5747	5591	5718	24	11.6	13.5937	14	5308.1
5790	5458	5549	5654	5564	5973	6055	5966	5934	6238	38	19.7	17.2893	18	5818.1
6285	5922	5483	5715	5958	5878	6010	6087	6128	6335	27	14.5	15.5519	16	5980.1
6173	5880	5805	6039	6044	6394	6264	6583	6172	6158	15	12	20.9004	20	6151.2
5680	5541	5400	5575	5530	5902	5961	6213	6304	6560	22	11.9	14.9175	14	5866.6
5522	5572	5426	5402	5491	5973	6131	6437	6353	5808	39	12.4	10.6633	10	5811.5
6209	6102	6187	6304	6237	6480	6634	6717	6871	6838	23	13.4	16.1778	16	6457.9
4394	4143	4517	4303	4245	4462	4765	4685	4942	4969	13	13.2	26.0405	26	4542.5
5393	5283	5268	5603	5639	6168	5413	6396	6243	6361	22	14.1	17.5991	18	5776.7
5114	5447	5614	5577	6064	6178	5787	6504	6478	6567	13	6.1	12.776	12	5933
4706	5182	5426	5481	5678	5260	5526	5636	5849	5795	27	18.6	19.9092	20	5453.9
5580	5124	5058	5264	5210	5359	5805	5988	6297	6381	20	12.9	17.4296	18	5606.6
4776	4633	4635	4826	4745	4994	5081	5250	5390	5572	15	12.1	21.0636	22	4990.2
5566	4745	4638	5342	5251	6124	5120	5916	6098	6703	31	16.4	16.0699	16	5550.3
5886	5370	5504	5413	5523	5930	5959	6116	6357	6351	38	18	15.7751	16	5840.9
5678	5182	5312	5753	5790	6045	5566	6182	5760	6038	24	10.3	12.0959	12	5730.6
5128	4674	4510	4762	4602	5134	4973	5055	5176	5018	28	10.8	11.3171	12	4903.2
4174	4783	4954	4914	4989	5278	4973	5499	5350	5242	16	10.8	17.8509	18	5015.6
5129	4975	5175	5354	5141	5474	5164	6023	6053	5678	22	9.4	11.8546	12	5416.6
5658	4832	5173	5583	5527	5787	5434	5764	6045	6040	45	18.5	15.0546	16	5584.3
4666	3891	3901	4649	4001	4464	4640	4775	4871	4988	26	15	16.5125	16	4484.6
5442	5527	5396	5598	5809	5995	5853	5913	5731	6122	14	8.3	15.8003	16	5738.6
5173	4821	4801	5059	5090	4890	5097	5452	5449	5636	14	10.2	19.14	20	5146.8
6154	5946	5709	6085	6007	6189	5714	6241	6522	6701	15	8.7	15.4611	16	6126.8
4957	4930	4586	4868	4732	5232	5397	5462	5549	5486	24	14	16.3513	16	5119.9
5056	4952	4923	5129	5081	5375	5440	5570	5972	5774	20	13	17.5601	18	5327.2
5255	5012	5298	5302	5310	5638	5590	5879	5594	5898	16	12.6	20.6469	20	5477.6
5862	6163	6209	6282	6255	6557	6566	6623	6966	6924	16	12.4	20.3374	20	6440.7
4499	4375	4556	4633	4785	5014	4905	4856	4956	5077	17	13.3	20.6018	20	4765.6
5480	5597	5646	5678	5666	6286	5719	5922	5992	6216	13	7.1	14.6965	14	5820.2
5274	5094	5178	5301	5294	5692	5731	5868	6150	5757	27	15.9	17.0407	18	5533.9
5466	5472	5558	5756	5754	6014	5235	6228	6418	6140	15	13.2	22.8536	22	5804.1
5941	5611	5852	5446	5658	6353	6275	6414	6319	6775	16	9	15.0286	16	6064.4
5471	4907	4829	4969	5185	5438	4857	5326	5646	5777	11	7.2	17.5862	18	5240.5
5800	5294	5541	5294	5008	5988	5759	5937	5867	5784	24	8.8	10.3634	10	5627.2
4734	5138	5090	5116	5093	5822	5655	5925	6222	6293	20	12.2	16.5154	16	5508.8
4930	4754	5026	5239	4966	5198	5049	5664	5376	5592	14	11.4	21.2264	22	5179.4
5426	5603	5082	5255	5389	5937	5868	6209	6319	6309	28	13.4	14.0257	14	5739.7
5352	5957	6002	5946	5774	6347	6261	6607	6932	7003	27	19.2	20.5462	20	6218.1
5586	5438	5070	5654	5574	5967	5983	6256	6114	5868	23	11	13.3368	14	5751
5586	5360	4838	5444	5465	5998	5497	5832	5574	5650	23	13.4	16.1778	16	5524.4
5486	5024	4898	5322	5257	5925	5374	6029	6081	6226	31	14.3	14.0076	14	5562.2
5622	5758	5810	5837	5876	6085	6167	6461	6466	6636	23	13	15.7051	16	6071.8
6382	5938	6191	6124	5948	6600	6520	6588	6642	6890	18	11.6	17.2078	18	6382.3
5658	5528	5616	5622	5606	6068	6117	6091	6437	6561	23	12	14.522	14	5930.4
5073	4948	4914	4888	5159	5248	5283	5656	5765	5854	14	12.4	22.9534	22	5278.8
5767	5576	5404	5920	5645	5655	5978	5983	5972	6179	14	5.7	11.139	12	5807.9
4752	4103	4389	3964	3864	4565	4102	4168	4298	4489	36	15.6	14.0272	14	4269.4
5988	5984	6021	6047	6177	6244	6438	6865	6867	6882	21	12.1	15.7402	16	6351.3
4830	4601	4418	4766	4650	5086	4980	5018	5058	5083	21	16.3	21.0168	22	4849
4778	4570	4457	4506	4332	4718	4696	4990	4753	4726	24	13	15.2034	16	4652.6
5538	5527	5598	5555	5560	5982	6074	6406	6610	6612	19	12.2	17.2414	18	5946.2
5675	5367	5586	5613	5294	5846	5882	5904	6155	6230	15	13	22.5288	22	5755.2
4270	3930	3956	4119	4159	4193	4611	4474	4560	4599	23	14.6	17.594	18	4287.1
5525	5419	5474	5718	5527	5874	5754	6479	6491	6604	21	13	16.8749	16	5886.5
5258	4986	5195	5045	4830	5400	5691	5722	5829	5810	18	12.2	18.0575	18	5376.6
5193	5074	5070	5310	5478	5427	5712	5734	6194	5776	23	7.8	9.52728	10	5496.8
6016	5546	5603	5146	5801	5993	5604	6158	6698	5660	16	10.9	18.0069	18	5822.5
5553	5370	5504	5413	5523	5930	5959	6116	6357	6351	38	18.5	16.2202	16	5807.6
8337	7296	7370	8128	8059	8922	8340	8170	9109	9335	16	12.4	20.3374	20	8306.6
5590	5592	5597	5410	6114	6013	5726	5814	5850	6304	29	14.1	14.4135	14	5801
5354	4796	4930	4961	5229	5457	5298	5703	5482	5646	24	11.4	13.3635	14	5285.6
5090	5050	4937	5088	4916	5522	5488	5562	5794	5654	23	12	14.522	14	5310.1
5385	5109	5444	5177	5670	5958	5301	5864	6267	6453	17	7.4	11.8035	12	5662.8
5072	5128	4809	5031	5082	5480	5190	5590	5607	5455	22	10.4	13.082	14	5244.4
5465	4825	5114	5194	5078	5469	5388	5720	5897	5914	24	14.8	17.2685	18	5406.4
5566	5433	5558	5733	5569	6131	5911	6037	6518	6363	21	14.7	19.0121	20	5881.9
5086	4986	4958	5157	5758	5765	5579	5830	6206	6576	24	10.4	12.2112	12	5590.1
4201	5126	5218	5121	5291	6090	5801	6022	5581	6182	15	7.1	12.7793	12	5463.3
5615	5442	5558	5507	5492	6067	5931	6126	6140	6549	41	15.3	12.897	12	5842.7
5876	5425	5497	5329	5655	5993	5662	5837	6161	6598	19	10	14.2426	14	5803.3
5790	5344	5362	5585	5901	6122	5749	6004	6134	6121	39	17.9	15.4898	16	5811.2
5678	5182	5312	5753	5790	6045	5566	6182	5760	6038	24	13.2	15.4331	16	5730.6
4553	5242	5363	5370	5563	5745	5605	5847	6054	5914	19	9.7	13.8318	14	5525.6
5921	5488	5508	5697	5574	5857	5542	6214	6299	6399	21	13.2	17.1268	18	5849.9
5398	5306	5467	5335	5185	6051	5744	5988	5855	5912	27	11.2	12.0376	12	5624.1
6454	6219	5905	6132	6009	6310	5985	6651	6895	6851	11	5.4	13.5563	14	6341.1
5466	5472	5558	5756	5754	6014	5235	6228	6418	6140	19	13.1	18.4618	18	5804.1
5611	5159	4639	5362	5140	5877	4878	5976	6125	6293	16	9.3	15.501	16	5506
5488	4970	4952	5748	5649	5787	5444	6089	6052	6700	27	20.9	22.35	22	5687.9
5225	5466	5655	5486	5573	5997	6014	6124	6524	6255	20	12.4	16.7768	16	5831.9
6070	5229	5184	5634	5502	6202	5933	6348	6401	6014	24	8.8	10.3634	10	5851.7
5346	4759	4896	4867	4895	5207	5219	5506	5523	5665	23	13	15.7051	16	5188.3
6324	6270	6207	6154	6370	6630	6605	6723	6932	6566	15	12.7	22.0412	22	6478.1
5517	5497	5475	5426	5674	6074	5788	6088	6027	6479	24	13.4	15.6627	16	5804.5
5358	5240	5278	5525	5271	5846	5570	6064	5907	5769	23	17.8	21.3589	22	5582.8
6044	6071	5937	6058	5926	6407	6365	6609	6799	6764	18	13.9	20.455	20	6298
5102	5221	5258	4935	5164	5450	5522	5912	5756	5840	11	7.2	17.5862	18	5416
6158	6036	6080	6174	5974	6459	6211	6705	6920	6826	20	14.5	19.5132	20	6354.3
5331	5511	5369	5565	5507	5932	5504	5948	5763	6077	17	11.4	17.7952	18	5650.7
5434	4754	4826	5054	4834	5423	5352	5307	5938	6035	16	13.8	22.4983	22	5295.7
5651	7796	7651	8296	7849	8974	8062	8911	9040	9262	15	8.2	14.6266	14	8149.2
8621	7578	7608	8311	8053	8714	8092	8636	8994	9394	26	14	15.4235	16	8400.1
5745	4940	4712	5604	5307	6078	5417	5800	6233	6342	16	6.9	11.6948	12	5617.8
4957	4930	4586	4868	4732	5232	5397	5462	5549	5486	24	11.4	13.3635	14	5119.9
5468	5814	5771	5751	6020	6404	6264	6203	6634	6648	17	12.4	19.275	20	6097.7
4768	4570	4654	4845	4891	5222	5298	5248	4981	5270	16	12.2	20.0276	20	4974.7
5495	4841	5214	5572	5482	5642	5558	5648	6112	6100	18	11.3	16.7823	16	5566.4
4794	4661	4459	4391	4507	4881	4663	4998	5003	4829	15	10.1	17.7821	18	4718.6
4192	4278	4492	4213	4146	4535	4513	4648	4817	5046	16	7.6	12.8117	12	4488
5566	5102	5296	5450	5386	5898	5500	5801	6223	5818	23	13.4	16.1778	16	5604
5795	5692	5317	5571	5608	5586	5762	6162	6044	6028	11	3.7	9.62934	10	5756.5
4919	4438	4602	4467	4310	4429	4780	5243	5393	5046	26	15	16.5125	16	4762.7
5626	5269	5421	5872	5890	6040	5795	6119	6389	6043	22	14	17.4774	18	5846.4
5600	5768	4961	5698	6190	5890	6166	6724	6073	6503	17	11.3	17.6469	18	5957.3
5657	5269	5598	5500	5737	5994	5627	6300	5815	5826	20	8.4	11.5175	12	5732.3
5784	5717	5738	5796	5826	6128	6046	6401	6656	6768	20	12.6	17.038	18	6086
5332	4861	4741	5190	5119	5747	5515	5746	5814	5539	25	12.5	14.1888	14	5360.4
4422	3986	4251	4539	4490	4495	4802	4921	4813	4798	15	13.1	22.6913	22	4551.7
5298	5130	4969	5134	4942	5529	5362	5725	5492	5919	18	10.1	15.075	16	5350
5702	5306	5428	5358	5726	5806	5683	5742	5898	6314	22	12	15.0396	16	5696.3
4834	4738	4922	5304	4846	5498	5369	5692	5649	5974	14	9.3	17.564	18	5282.6
5641	5304	5338	5466	5534	5934	5614	5795	6007	6212	26	11.4	12.5879	12	5684.5
4651	4558	4770	4813	4693	5106	4924	4966	5014	5122	14	11.4	21.2264	22	4861.7
5372	5467	5626	5914	5554	5944	6221	6505	6583	6566	14	13.1	24.1564	24	5975.2
4299	4247	4464	4299	4371	5043	4719	4761	5097	4770	21	11.4	14.8559	14	4607
4582	5602	5788	5520	5676	5766	6217	6055	6428	6054	38	15.6	13.6413	14	5768.8
5650	5430	5613	5390	5622	5824	5881	5755	6405	6227	15	9.8	17.2865	18	5779.7
5358	5240	5278	5525	5271	5846	5570	6064	5907	5769	23	16.5	19.8313	20	5582.8
5966	5866	5889	5950	5786	6458	6442	6331	6450	6778	16	13.3	21.728	22	6191.6
5846	5433	5558	5733	5569	6131	5911	6037	6518	6363	13	7.8	16.0281	16	5909.9
5574	5261	5366	5534	5414	5756	5774	6396	6369	6276	21	14	18.133	18	5772
5241	5131	5070	4919	4882	5297	5679	5876	5510	5949	23	9.4	11.4356	12	5355.4
5441	5138	5401	5483	5501	5816	5409	5934	6199	6265	18	10.9	16.2141	16	5658.7
5354	5178	5483	5561	5563	5778	5742	6152	6204	6265	24	13	15.2034	16	5728
5215	4819	5284	5181	5132	5710	5560	5572	5521	5565	20	11.5	15.5993	16	5355.9
5575	4934	4702	5174	4959	5110	4996	5328	5245	5344	24	8.8	10.3634	10	5136.7
5098	5131	5198	5350	5315	5482	5350	5874	5658	5494	22	14	17.4774	18	5395
5135	5010	5650	5405	5366	5590	5730	5502	5937	5997	19	10.6	15.0628	16	5532.2
4995	5010	5650	5405	5366	5590	5730	5502	5937	5997	18	10.3	15.3601	16	5518.2
5354	5178	5483	5561	5563	5778	5742	6152	6204	6265	23	12	14.522	14	5728
6003	5057	4700	5410	5358	5984	5077	6074	6176	6496	20	15.2	20.4222	20	5633.5
5608	5922	5483	5715	5958	5878	6010	6087	6128	6335	27	14.4	15.4455	16	5912.4
6016	5450	5691	5366	5884	6091	6090	6079	5819	5940	21	11.5	14.9823	14	5842.6
5784	5642	5583	5536	5630	6008	6170	6353	6487	6769	23	12	14.522	14	5996.2
5575	5542	5309	5554	5980	5951	5716	6142	6226	6612	12	4.4	10.2762	10	5860.7
5220	5128	4809	5031	5082	5480	5190	5590	5607	5455	19	11.6	16.4258	16	5259.2
5904	5542	5591	5702	6089	5926	5826	6395	6386	5867	20	16.8	22.4946	22	5922.8
5138	4796	4930	4961	5229	5457	5298	5703	5482	5646	22	12	15.0396	16	5264
5250	5047	4820	5094	5130	5457	5106	5394	5673	5773	24	11.1	13.018	14	5274.4
4468	4214	4177	4270	4245	4278	4434	4521	4665	4821	14	8.3	15.8003	16	4409.3
5484	5217	5561	5592	5839	5985	6046	6090	6476	6356	22	13.4	16.7471	16	5864.6
5358	5080	4966	5320	5116	5274	5461	5632	5699	5699	22	16.2	20.1488	20	5360.5
5664	5014	5253	5353	5421	5333	5476	5775	5954	6135	16	10.8	17.8509	18	5537.8
5718	5435	4770	5226	5206	5762	5999	6037	6166	5946	40	17.5	14.9584	14	5626.5
3749	4451	4557	4496	4806	4995	5013	4703	5309	5238	18	10.1	15.075	16	4731.7
5542	4762	4874	4840	4776	5058	5122	5351	5388	5093	24	8.8	10.3634	10	5080.6
5692	5537	5376	5338	5424	5843	5730	5716	6205	6158	17	12.3	19.1273	20	5701.9
4668	4983	4949	5264	5146	5846	5409	5762	5917	5840	24	8.8	10.3634	10	5378.4
5453	5204	5272	5311	5313	5568	5534	5805	5970	6134	17	7.7	12.2576	12	5556.4
5139	5093	4990	4786	4891	5566	5355	5349	5392	5638	20	10	13.6297	14	5219.9
5000	5237	5270	5600	5520	5882	4990	6157	5886	5645	21	8.4	11.0462	12	5518.7
5404	5786	5471	5466	5638	6166	5927	6235	6393	6122	23	10.6	12.8621	12	5860.8
5730	5345	5536	5633	5782	6062	5771	6252	6294	6216	16	11.9	19.5624	20	5862.1
4823	4594	4444	4679	4658	4977	5018	5025	5247	5065	19	9.6	13.6948	14	4853
5804	5839	5775	5938	5853	6134	5988	6246	6407	6740	21	14.1	18.2587	18	6072.4
5323	5004	5295	5181	5281	5573	5744	5979	5942	5751	24	15.6	18.1849	18	5507.3
6151	6222	5879	6090	6127	6406	6481	6692	6800	6674	19	10.2	14.5162	14	6352.2
4947	5092	5007	5815	5856	5413	5590	6010	6326	6486	21	13.6	17.6301	18	5654.2
5749	5594	5541	5676	5835	6256	5958	6129	6500	6499	29	13.9	14.2096	14	5973.7
4890	4309	4339	4665	4683	4723	5233	5150	5173	5096	21	12	15.614	16	4826.1
5170	5427	4819	5319	5470	5541	5693	5954	6095	5771	21	11.1	14.4764	14	5525.9
5687	6071	5937	6058	5926	6407	6365	6609	6799	6764	19	11.8	16.6979	16	6262.3
5453	5204	5272	5311	5313	5568	5534	5805	5970	6134	19	10.3	14.653	14	5556.4
5584	5253	5251	5702	5918	6116	5570	6055	6026	6068	24	8.6	10.132	10	5754.3
5300	5022	5088	5223	5193	5537	5182	5858	5926	6053	14	6.6	12.7666	12	5438.2
5658	5374	5247	5353	5541	5851	5805	6299	6061	6199	24	11.5	13.4786	14	5738.8
5674	5008	5512	5523	5692	5732	5830	5803	5895	5938	23	11.5	13.9297	14	5660.7
5218	5367	5586	5613	5294	5846	5882	5904	6155	6230	11	6.9	16.9219	16	5709.5
6939	5041	4894	4916	4886	5453	5473	5562	5546	5588	39	18.8	16.2823	16	5429.8
4409	4676	4480	4730	5132	5128	5158	5688	5516	5471	19	11.6	16.4258	16	5038.8
5687	5310	5271	5818	5997	6012	5605	6107	6071	6363	33	16.2	15.2933	16	5824.1
4850	4669	4628	4922	4526	4834	4544	4830	4719	4641	21	11	14.3499	14	4716.3
5543	5496	5449	5464	5593	5341	5841	5920	6110	6142	25	11	12.5091	12	5689.9
5562	5915	5726	5946	5846	6390	6076	6716	6614	6865	15	13.2	22.8536	22	6165.6
5552	5357	5715	5712	6102	5886	5798	5875	6410	6334	22	13.7	17.1123	18	5874.1
4840	4418	4211	4317	4516	4682	4596	4826	4743	4650	23	11.9	14.4036	14	4579.9
6114	5866	5889	5950	5786	6458	6442	6331	6450	6778	20	16.4	21.9772	22	6206.4
5615	5374	5515	5418	6057	6125	5809	6478	6069	6446	13	6.2	12.9691	12	5890.6
5589	5401	5155	5393	5613	5894	5734	6268	5832	6101	18	13.2	19.4694	20	5698
5730	5345	5536	5633	5782	6062	5771	6252	6294	6216	21	11.5	14.9823	14	5862.1
5898	5746	5806	5828	6101	6066	6290	6350	6320	6610	18	10.1	15.075	16	6101.5
4326	4728	4529	4623	4400	4503	4810	5215	5099	5172	14	10.8	20.1852	20	4740.5
5590	5292	5454	5390	5458	6151	5647	5787	6185	6439	26	15.7	17.2743	18	5739.3
5233	5442	5443	5313	5588	5717	5854	5972	6234	6321	12	6.2	14.0593	14	5711.7
4789	4210	4730	4919	4612	4539	4559	5245	4336	4746	12	7.6	16.9348	16	4668.5
5671	4669	4814	4960	5370	5434	5852	5787	6230	6284	27	14.9	15.9774	16	5507.1
4754	4809	4803	4910	4906	5408	5164	5357	5439	5317	25	12.5	14.1888	14	5086.7
4990	4530	4727	4778	4817	5332	5328	5560	5486	5652	40	14.9	12.6982	12	5120
5622	5444	5384	5458	5576	6026	5946	6122	5927	6338	23	9.4	11.4356	12	5784.3
6939	5041	4894	4916	4886	5453	5473	5562	5546	5588	38	17.9	15.6861	16	5429.8
5713	5074	5210	5401	5690	5964	5707	5908	5905	6215	34	13.8	12.7899	12	5678.7
5414	4838	5177	5438	5609	6150	5610	5718	6113	6067	14	5	9.86082	10	5613.4
5574	5482	5504	5665	5613	5423	5653	6136	6278	6224	14	9.7	18.2657	18	5755.2
5566	5433	5558	5733	5569	6131	5911	6037	6518	6363	21	14.3	18.5099	18	5881.9
4983	5095	5176	5237	5075	5567	4745	5861	5635	6369	12	5.7	13.0193	14	5374.3
5258	4062	4308	4126	4458	4707	4925	5077	5150	5296	21	15.1	19.5139	20	4736.7
5615	4911	5192	5315	5512	5646	5694	5909	6012	5563	30	9.6	9.6	10	5536.9
5086	5008	5122	5318	5280	5523	5550	5980	5850	5270	21	11.4	14.8559	14	5398.7
5656	5871	5770	5775	5992	6406	6378	6344	6098	6355	16	8.1	13.6059	14	6064.5
5697	5138	5401	5483	5501	5816	5409	5934	6199	6265	18	11.2	16.6403	16	5684.3
5018	5265	5304	5514	5269	5783	6007	6382	6311	6410	23	9.4	11.4356	12	5726.3
5350	5220	5378	5445	5427	5861	5722	6240	6163	6126	19	15.8	22.1043	22	5693.2
5886	5799	5746	5875	5843	6268	6178	6328	6350	6761	20	16.8	22.4946	22	6103.4
5832	5666	5918	5795	5902	6211	6024	6403	6666	6703	25	16.6	18.7661	18	6112
5306	5648	5649	5699	5629	6268	6098	6361	6409	6374	19	18.8	26.1231	26	5944.1
5112	5258	5091	5464	5522	5858	5658	6168	5804	6054	16	9.7	16.1296	16	5598.9
5475	5284	5274	5468	5639	5986	5355	5995	5946	6061	18	14.8	21.7189	22	5648.3
5695	5509	5534	5468	5345	5980	5865	6200	6166	5925	18	14.8	21.7189	22	5768.7
5291	5115	5291	5213	5380	5546	5668	6069	6097	6116	21	13.6	17.6301	18	5578.6
5452	5273	5294	5538	5657	5769	5914	5954	5915	6134	24	12.3	14.399	14	5690
4288	4602	4418	4671	4497	4775	4579	4694	4744	4615	23	13.7	16.5321	16	4588.3
5626	5269	5421	5872	5890	6040	5795	6119	6389	6043	22	14.8	18.45	18	5846.4
5372	5137	5096	5149	5044	5242	5646	5799	5878	5546	23	12	14.522	14	5390.9
5293	5122	5172	5306	5233	5780	5759	5992	5893	6068	18	16	23.3989	24	5561.8
5086	5015	4971	5183	5130	5712	5409	6191	5904	5802	24	8.8	10.3634	10	5440.3
5998	6059	5694	5770	6196	6471	6388	6619	6702	6542	18	10.8	16.0719	16	6243.9
5530	4943	4754	4840	4849	5374	5322	4957	5269	5521	25	11.8	13.4054	14	5135.9
5599	4663	4594	5343	5143	5848	5599	6214	6444	6083	22	12	15.0396	16	5553
5599	4663	4594	5343	5143	5848	5599	6214	6444	6083	27	14	15.0198	16	5553
5443	5601	5414	5413	5671	6051	5500	6383	6144	5987	31	15.6	15.2842	16	5760.7
5449	5517	5514	5604	5942	5990	6062	5806	6101	6308	12	4.4	10.2762	10	5829.3
5532	4925	5010	5473	5481	5683	5702	5854	6036	5917	21	7.3	9.63983	10	5561.3
5233	5490	5522	5643	5674	6165	5946	6360	6562	6322	23	13	15.7051	16	5891.7
6285	4986	4889	5452	5581	5681	5424	6209	6122	6611	17	9.2	14.5158	14	5724
5664	5014	5253	5353	5421	5333	5476	5775	5954	6135	23	10.4	12.6246	12	5537.8
5131	4736	4886	4895	5241	5447	5429	5538	6000	5782	24	13	15.2034	16	5308.5
5829	6062	5792	6187	6245	6525	6618	6717	6846	6723	19	12.2	17.2414	18	6354.4
4947	5466	5655	5486	5573	5997	6014	6124	6524	6255	14	9	17.0364	18	5804.1
5829	5025	5098	5395	5516	6010	5458	6022	6052	6665	26	16.8	18.4707	18	5707
5832	5666	5918	5795	5902	6211	6024	6403	6666	6703	25	17.3	19.5459	20	6112
5258	5017	5094	5166	5311	5567	5462	5753	5642	5746	21	10.2	13.3361	14	5401.6
5800	5269	5225	5271	5020	5690	5704	5574	5949	5985	16	7.6	12.8117	12	5548.7
5638	4144	4539	4042	4205	4506	4628	4840	4964	5090	27	9.3	10.0105	10	4659.6
5288	5556	5447	5629	5817	6139	5592	6023	6239	6396	23	13	15.7051	16	5812.6
5658	4832	5173	5583	5527	5787	5434	5764	6045	6040	21	14.3	18.5099	18	5584.3
5766	5382	5038	5228	5788	5382	5727	6107	6057	5794	69	19.5	14.149	14	5626.9
5930	6247	5786	5778	5922	6061	6222	6759	6521	6446	33	13.6	12.8237	12	6167.2
5811	4919	4921	5119	5322	5878	5010	5935	6177	6528	38	14.5	12.6649	12	5562
5090	5050	4937	5088	4916	5522	5488	5562	5794	5654	22	12	15.0396	16	5310.1
5242	5326	5324	5882	5836	6041	5596	6211	5680	6127	24	9	10.5947	10	5726.5
4582	5526	5736	5746	6227	6233	6589	6229	6116	6542	38	14.8	12.9311	12	5952.6
5449	5205	4918	5492	5148	5522	5550	5795	6202	5165	20	10.2	13.8929	14	5444.6
5331	4968	5010	5306	4988	5372	5219	5683	5804	5517	24	14	16.3513	16	5319.8
5105	5220	5378	5445	5427	5861	5722	6240	6163	6126	20	13.8	18.6026	18	5668.7
5641	6010	5685	6011	6152	6257	6179	6293	5953	6148	19	12.2	17.2414	18	6032.9
6330	5958	6010	5974	5912	6399	6288	6611	6525	6798	28	10.8	11.3171	12	6280.5
5277	5394	5384	5511	5142	5479	5859	5915	5923	6081	37	17.2	15.2664	16	5596.5
5658	5386	5388	5381	5388	5829	5797	6076	6430	6277	15	13.3	23.0158	24	5761
5080	5021	5046	5145	5257	5539	5582	5537	5784	5939	36	10.2	9.12358	10	5393
5706	5338	5542	5386	5505	5611	5686	6091	6265	5976	23	12	14.522	14	5710.6
5484	5425	5497	5329	5655	5993	5662	5837	6161	6598	12	6.2	14.0593	14	5764.1
4751	5086	4807	4929	5276	5281	5785	6082	5864	5942	23	12	14.522	14	5380.3
5692	5430	5202	5255	5255	5642	5538	5403	5987	6068	17	12.2	18.9796	18	5547.2
5589	5601	5414	5413	5671	6051	5500	6383	6144	5987	29	14.4	14.7194	14	5775.3
5468	5231	5622	5447	5719	6035	5886	6290	6062	5921	18	11.1	16.4983	16	5768.1
4870	4808	5131	5100	5182	5106	5218	5684	5594	5823	14	9.7	18.2657	18	5251.6
4571	4278	4492	4213	4146	4535	4513	4648	4817	5046	21	8.4	11.0462	12	4525.9
4464	4878	4644	4862	4572	5175	5066	5237	5276	5225	18	9	13.502	14	4939.9
6063	5946	5902	5779	5962	6313	6433	6525	6686	6717	18	12	17.7745	18	6232.6
5792	4847	4858	5320	5315	6105	4900	5881	5894	6569	28	9.8	10.2744	10	5548.1
4982	4986	4942	5059	5146	5511	5486	5527	5851	5752	24	9.9	11.6344	12	5324.2
5733	4986	4889	5452	5581	5681	5424	6209	6122	6611	16	9.9	16.4434	16	5668.8
5930	4841	5214	5572	5482	5642	5558	5648	6112	6100	19	13.2	18.5972	18	5609.9
5308	5554	5530	5650	5615	6047	6114	6245	6278	6581	21	12	15.614	16	5892.2
5767	5768	4961	5698	6190	5890	6166	6724	6073	6503	19	14.2	19.949	20	5974
5841	4948	5074	5437	5929	5621	5572	5921	6350	6174	18	12.9	19.0464	20	5686.7
4170	4571	4971	5423	4748	5057	4996	5504	5962	5293	17	10.9	17.0529	18	5069.5
4947	4538	4764	4923	4862	5390	5169	5590	5495	5639	21	15.1	19.5139	20	5131.7
5825	5295	5486	5449	5761	5709	5822	5891	6192	6355	18	9	13.502	14	5778.5
5441	5329	5382	5886	5929	5356	5685	6088	6084	6445	18	5.9	9.01861	10	5762.5
8477	5248	5406	5842	5975	5871	5870	6048	5742	6353	31	12.7	12.4368	12	6083.2
5821	5658	5442	5842	6275	6262	6016	6067	5513	6273	16	6.6	11.2143	12	5916.9
5519	5186	5269	5658	5838	5839	5623	5890	6278	6529	21	15.4	19.8899	20	5762.9
8574	4697	4697	5261	5345	6230	5406	5554	5712	6610	20	10.8	14.6813	14	5808.6
5733	4789	4537	5181	5405	6008	5381	5521	6052	6095	21	11.2	14.6029	14	5470.2
5724	5600	5461	5798	5703	6133	5778	6260	6113	6344	20	8.6	11.7822	12	5891.4
5903	4778	4735	5424	5261	6123	5402	5510	6060	6297	21	9.8	12.8284	12	5549.3
5859	5101	4755	5466	5443	6231	5192	6106	6146	6406	19	18.7	25.9896	26	5670.5
5251	5274	5354	5209	5203	5420	5269	5758	6047	5854	26	10	11.0581	12	5463.9
5837	4943	5026	5837	5349	6256	5192	6003	5934	6584	31	13.6	13.3203	14	5696.1
5465	4750	4828	5337	5413	6217	5326	5968	5891	6204	21	11.1	14.4764	14	5539.9
8771	7685	7413	8329	8218	9009	8335	8729	8974	9426	36	15.1	13.5721	14	8488.9
5773	5570	5219	5673	6013	5506	5830	6098	5995	6089	36	14.4	12.9354	12	5776.6
5904	5655	5233	5822	6050	6206	5657	5860	5928	6054	31	12.7	12.4368	12	5836.9
5891	5459	5590	5601	5734	5866	5611	5880	5946	6231	36	16.7	15.0289	16	5780.9
5685	4784	4675	5194	5075	5837	5244	6018	5811	6157	41	14.4	12.1238	12	5448
5837	4943	5026	5837	5349	6256	5192	6003	5934	6584	16	11.7	19.252	20	5696.1
5663	5186	5269	5658	5838	5839	5623	5890	6278	6529	18	7.2	10.909	10	5777.3
5729	5430	5242	5650	5526	6162	5810	5995	5896	6192	21	9.8	12.8284	12	5763.2
5434	5665	5409	5858	5974	6331	5867	6015	6058	6166	21	10.7	13.97	14	5877.7
8761	4805	4889	5740	5651	6166	5591	6006	6071	6415	11	3.6	9.39358	10	6009.5
5918	4936	4501	5334	5211	5954	5426	5558	5879	6501	24	13.7	16.0071	16	5521.8
5456	4692	4481	5233	4875	5863	5160	5760	5851	6229	18	9.2	13.7886	14	5360
5824	4785	4837	5441	5402	6170	5232	6035	6022	6365	14	5.9	11.5022	12	5611.3
5897	5133	4805	5431	5506	6396	5670	6133	6363	6289	31	14.8	14.4986	14	5762.3
5466	4837	4584	5274	5295	5801	4938	5804	5949	6279	16	11.3	18.6301	18	5422.7
5802	4703	4852	5715	5197	6064	5471	5688	6197	6485	36	19.5	17.5824	18	5617.4
6017	5474	5383	5872	6041	6579	6115	6588	6248	6882	16	10	16.6001	16	6119.9
5618	5440	5440	5569	5731	5941	5894	5825	5778	6329	17	9	14.2158	14	5756.5
5705	4578	4791	5576	5521	6075	5197	6015	5956	6507	36	14.1	12.6626	12	5592.1
5305	5391	5094	5537	5871	5752	5745	5902	5765	6565	13	5.4	11.4173	12	5692.7
5534	5834	5523	5501	6042	6163	5803	5642	6215	6430	11	6.3	15.585	16	5868.7
5918	4733	4711	5514	5505	6385	5325	5687	6215	6518	18	15.8	23.1193	24	5651.1
5764	4772	4805	5872	5539	6217	5524	5885	6062	6434	34	16.7	15.5034	16	5687.4
5534	5352	5244	5573	6004	5794	5651	5522	6103	6324	11	6.3	15.585	16	5710.1
5587	4922	4741	5539	5314	6205	5582	5880	6102	6478	24	10.2	11.9805	12	5635
5811	4629	4731	5320	5601	6147	5397	5851	5821	6553	20	11.5	15.5993	16	5586.1
5733	5370	5125	5533	5740	5758	5645	5794	5864	6250	16	6.6	11.2143	12	5681.2
5883	5793	5211	5972	5677	6009	5725	5774	5920	5324	13	6.4	13.3546	14	5728.8
8761	5430	5242	5650	5526	6162	5810	5995	5896	6192	21	10	13.0823	14	6066.4
6064	5459	5590	5601	5734	5866	5611	5880	5946	6231	31	9.5	9.2967	10	5798.2
5904	5655	5233	5822	6050	6206	5657	5860	5928	6054	31	12.7	12.4368	12	5836.9
5554	5685	5420	5502	5691	6047	5651	5976	5953	6376	21	13.5	17.5043	18	5785.5
5663	5278	5312	5673	5642	5896	5797	5901	6183	6394	21	7.7	10.1519	10	5773.9
4849	5161	5358	5460	5349	5750	5218	5880	5766	5401	27	8.6	9.26286	10	5419.2
5789	4858	4777	5076	5458	6284	5241	6196	6124	6479	19	10.7	15.1993	16	5628.2
5770	4858	4777	5076	5458	6284	5241	6196	6124	6479	16	10.7	17.6949	18	5626.3
5891	4667	4360	5389	5318	6240	5504	5493	5920	6391	31	15.5	15.186	16	5517.3
5950	5115	4539	5461	5305	6228	5218	5951	6091	6429	14	7.8	14.913	14	5628.7
5574	5457	5566	5680	5690	6011	5415	6110	5929	6066	18	12.4	18.3402	18	5749.8
5694	5358	5164	5595	5627	5887	5565	5897	5738	5938	20	11.3	15.3372	16	5646.3
5392	5470	5466	5470	5836	6155	5628	6319	5723	6037	24	9.6	11.288	12	5749.6
4298	4362	4824	4781	4767	5305	5060	5329	5122	5427	18	9.5	14.218	14	4927.5
4437	4942	4880	5020	4744	5703	5475	5405	5180	5415	21	8.7	11.4288	12	5120.1
5392	5498	5314	5752	5805	5942	5576	6518	6180	6125	19	10.3	14.653	14	5810.2
4816	4490	4696	4597	4556	4960	4804	4938	5201	5370	10	4.4	12.4627	12	4842.8
4298	4362	4824	4781	4767	5305	5060	5329	5122	5427	18	9.9	14.7896	14	4927.5
5369	5069	5258	5219	4908	5512	5583	5573	5823	5962	20	11.5	15.5993	16	5427.6
5472	5542	5208	5724	5930	5782	5602	6179	6085	6491	21	11.5	14.9823	14	5801.5
5453	5470	5466	5470	5836	6155	5628	6319	5723	6037	24	8.2	9.66898	10	5755.7
4802	4750	4773	4879	4826	5263	5224	5408	5520	5378	15	8	14.292	14	5082.3
5229	4963	5039	5202	5080	5498	5641	5921	5917	5850	10	3.5	10.1559	10	5434
4685	4437	4540	4681	4710	5113	5282	5317	5090	5456	15	9	15.9603	16	4931.1
4954	5342	5281	4962	5450	6168	5546	5966	5728	5866	20	11.1	15.075	16	5526.3
5773	6281	6117	6186	6123	6865	6431	6935	6743	6757	18	9.8	14.6468	14	6421.1
5062	4857	4981	5100	5004	5427	5162	5567	5510	5691	18	7.7	11.6319	12	5236.1
4816	4490	4696	4597	4556	4960	4804	4938	5201	5370	20	8.7	11.9145	12	4842.8
5371	5256	5328	5521	5644	6014	5570	5588	5910	6450	18	9.9	14.7896	14	5665.2
5601	5344	5170	5247	5889	6067	5192	6365	5950	5930	20	9.2	12.5752	12	5675.5
4955	4702	4905	4939	4832	5494	5302	5429	5326	5382	21	9.5	12.4472	12	5126.6
5456	5135	5167	5643	5674	5759	5726	5573	5999	6304	29	10.3	10.5374	10	5643.6
5546	4962	5326	5292	5484	5686	5367	5859	5574	5937	14	14.1	25.8673	26	5503.3
5874	4724	4589	5504	5338	5947	5259	5895	6193	6440	19	11.4	16.1536	16	5576.3
5395	5288	5518	5314	5582	5842	5591	5950	5899	6113	25	14.8	16.7589	16	5649.2
5459	5622	5435	5553	5578	5679	5849	5956	5898	6359	26	8.2	9.08768	10	5738.8
5430	5379	5534	5816	5628	6144	5718	6040	5971	6162	13	11.9	23.6654	24	5782.2
5070	5029	5080	5058	5010	5408	5471	5560	5564	5626	12	8.2	18.1528	18	5287.6
8367	7494	7192	8002	8060	9043	7845	8543	8920	9307	14	12	22.2638	22	8277.3
5361	5134	5232	5610	5886	6057	5909	5802	5832	6144	24	8.2	9.66898	10	5696.7
5425	5003	5034	5214	5070	5449	5260	5189	5018	5644	16	15.7	25.4115	26	5230.6
5418	5358	5358	5476	5170	5283	5517	5716	5630	6044	24	12.6	14.7438	14	5497
5474	5507	5457	5377	5478	5820	5726	5692	5720	6065	16	12	19.7176	20	5631.6
5717	4681	4312	5494	5146	5919	5076	5847	6264	6501	41	17.1	14.4461	14	5495.7
5638	4790	4647	5286	4857	6144	5182	6104	6114	5978	27	19.8	21.183	22	5474
5553	4919	5112	5146	5538	5656	5620	5708	5664	6166	22	16.1	20.0276	20	5508.2
5564	5286	5219	5309	5541	5942	5326	6041	5777	6195	34	14.9	13.8186	14	5620
5702	4951	4481	5527	5327	6273	5323	6178	6077	6830	13	4.3	9.25353	10	5666.9
5683	4733	4579	5202	5092	6028	5272	5714	6152	5905	18	10.3	15.3601	16	5436
5148	4309	4142	4307	4100	4782	4513	4611	4860	4466	41	16.3	13.7572	14	4523.8
5310	5438	5493	5208	5492	5482	5639	5838	5921	6114	22	13	16.2597	16	5593.5
5265	5666	5697	5798	5908	6086	5786	6023	6142	6475	13	8.6	17.5388	18	5884.6
5756	4976	4708	5598	5415	6375	5395	5680	6278	6361	15	9.3	16.4584	16	5654.2
5126	5114	4946	5112	4910	5493	5443	5815	5860	5841	24	11.7	13.7088	14	5366
5472	5418	5290	5534	5569	5726	5686	5685	5709	6174	22	9.3	11.7317	12	5626.3
6008	5731	5686	5822	5605	6254	5948	6461	6399	6095	28	12.4	12.9843	12	6000.9
5070	5029	5080	5058	5010	5408	5471	5560	5564	5626	18	11.4	16.9242	16	5287.6
5626	5214	5016	5610	5706	5806	5368	5731	6088	6093	30	17.9	17.9	18	5625.8
5470	5103	5088	5403	5163	5785	5414	5313	5700	5762	22	11.8	14.7953	14	5420.1
5766	4782	4649	5365	5047	6078	5491	6057	6070	6135	17	7	11.1965	12	5544
8779	7583	7561	8368	7437	9107	8395	8686	9040	9249	26	12.1	13.352	14	8420.5
5551	4899	4714	5662	5470	6090	5006	5888	5833	6398	47	20.4	16.3716	16	5551.1
5653	5007	4741	5446	5156	6169	5211	5934	5805	6214	13	10.5	21.0848	22	5533.6
5700	4801	4716	5168	5230	5869	4881	5628	5605	6514	30	17.2	17.2	18	5411.2
5442	5203	5190	5403	5903	6029	5635	5790	6229	6278	28	21.3	22.2408	22	5710.2
5492	5777	5670	5703	5809	6198	5973	6022	5889	6068	31	13.6	13.3203	14	5860.1
5556	5423	5097	5338	5560	5902	5886	5810	6129	6170	16	5.4	9.27909	10	5687.1
5550	5252	4945	5141	5513	5779	5578	5595	5604	6023	19	12.4	17.5129	18	5498
5372	4996	5274	5323	5343	5962	5806	5885	5737	5806	14	12	22.2638	22	5550.4
5690	4805	3141	5369	5240	6019	5325	5462	6137	6585	31	18.5	18.1328	18	5377.3
5553	4948	5023	5162	5678	5874	5610	5615	6004	6194	21	14.8	19.1376	20	5566.1
5671	5150	5033	5166	5383	5790	5542	5744	5590	5809	13	12.1	24.032	24	5487.8
5683	4882	4518	5107	4947	6027	5336	6000	6195	6310	20	11.1	15.075	16	5500.5
6049	5895	5730	5914	6237	6437	6051	6105	5802	6422	19	13.5	19.0032	20	6064.2
5434	5709	5277	5488	5571	5923	5874	6016	6073	5943	28	16.2	16.9397	16	5730.8
5086	5612	5374	5770	5714	5776	5754	6062	5789	6113	23	10.2	12.387	12	5705
5554	5554	5354	5238	5348	5952	6003	5553	5660	5683	28	12.4	12.9843	12	5589.9
5334	4803	4741	5472	5087	6052	5194	5708	6184	6498	39	17.5	15.1379	16	5507.3
5215	4909	4704	5390	5220	6136	5192	6094	5921	6106	46	16	12.8628	12	5488.7
5429	5127	5124	5342	5731	5702	5662	5857	5782	6258	16	12	19.7176	20	5601.4
5699	4838	4219	5219	4958	5933	5350	6085	6083	6397	21	14.2	18.3843	18	5478.1
5633	5906	5494	5657	5621	6074	5930	6206	6504	6613	13	10.8	21.6399	22	5963.8
5694	4723	4487	5281	5366	6039	4739	5989	5770	6256	20	9	12.3111	12	5434.4
5606	4989	5226	5382	5245	5711	5545	5662	5889	5814	16	12.4	20.3374	20	5506.9
5714	5247	4992	5340	5696	5962	5690	5799	5693	6002	21	13	16.8749	16	5613.5
5535	5614	5454	5974	5786	6062	6071	6611	6247	6370	32	11.9	11.4224	12	5972.4
5657	4605	4583	5357	5346	5763	5017	5834	5848	6127	20	8.8	12.0468	12	5413.7
5553	5450	5514	5670	6005	6140	5933	5917	6078	6093	44	16.2	13.2602	14	5835.3
5554	5765	5425	5810	6031	6400	5989	6064	5982	6466	24	10	11.7498	12	5948.6
5696	4681	4312	5494	5146	5919	5076	5847	6264	6501	39	15.7	13.5556	14	5493.6
8567	7491	7121	8056	7922	9015	7201	8710	9015	8514	16	11.7	19.252	20	8161.2
5633	5415	4827	5565	5764	5705	5602	6076	5766	6341	21	10.7	13.97	14	5669.4
5229	5753	5713	5500	5409	5810	5766	5766	6290	6175	25	12	13.6293	14	5741.1
5633	4913	4777	5061	5325	6147	5375	5882	6132	6447	21	10.6	13.8433	14	5569.2
5485	4785	4612	5233	4958	6082	5048	6106	5741	5805	14	13.2	24.3279	24	5385.5
5282	4892	4964	5631	5615	5254	5392	5467	5052	6054	24	14.3	16.6953	16	5360.3
5877	7494	7504	8071	7664	9079	8170	8908	9086	9305	13	10.5	21.0848	22	8115.8
5793	5045	4680	5463	5403	6051	5007	5931	6314	6494	13	4.3	9.25353	10	5618.1
5352	5334	5227	5222	5243	5774	5493	5702	5653	5926	13	12.7	25.1292	26	5492.6
5694	7394	7270	8216	7978	9045	8055	8288	9005	9299	20	13.9	18.7328	18	8024.4
5540	4396	4637	5354	5243	6021	5129	6011	5723	6261	16	13.2	21.5738	22	5431.5
5230	5290	5409	5222	5238	5886	5639	5708	5505	5670	14	13.5	24.8418	24	5479.7
5488	5402	5730	5738	5902	6286	5838	5900	6038	5943	21	10.7	13.97	14	5826.5
5751	5200	5332	5429	5141	5849	5557	5537	5812	5950	14	14.7	26.8897	26	5555.8
5515	5068	4725	5470	5684	6176	5641	5840	5962	5945	24	9.8	11.5189	12	5602.6
5990	5734	5550	5740	5870	5605	5918	6032	5979	6205	23	11.9	14.4036	14	5862.3
5012	5612	5662	5632	5714	6342	5737	6042	6149	6418	18	11.8	17.4912	18	5832
5605	5406	5298	5010	5934	5922	5950	5857	6113	6001	31	10.3	10.0815	10	5709.6
5884	6118	5838	5906	5802	6370	6089	6359	6424	6700	17	9.4	14.8154	14	6149
5862	5673	5554	5694	5802	6018	5635	6039	5519	6325	21	11.7	15.2351	16	5812.1
5126	4803	4741	5472	5087	6052	5194	5708	6184	6498	18	7.7	11.6319	12	5486.5
5385	5807	5344	5529	5549	6256	5782	6168	6130	6054	31	15	14.695	14	5800.4
5678	5208	5250	5320	5264	5950	5039	5698	5904	5692	28	13.2	13.8175	14	5500.3
5391	5390	5182	5806	5714	5820	5467	5775	5884	6446	20	10.1	13.7613	14	5687.5
5875	5160	4662	5270	5226	5518	5328	5345	5590	5998	16	10.1	16.7568	16	5397.2
5843	5048	4836	5513	5345	6304	5084	5798	6091	6455	20	8.4	11.5175	12	5631.7
7011	7472	7035	7996	7911	9036	7974	8675	8772	9293	52	17	13.118	14	8117.5
5745	4772	4488	5486	5226	6147	5163	6166	6157	6589	18	14.8	21.7189	22	5593.9
5814	5548	5431	5670	5646	5734	5685	6148	6046	6242	12	6.8	15.2979	16	5796.4
5767	5370	5423	5604	5586	5588	5900	5995	6195	6301	27	11	11.8243	12	5772.9
5756	4870	4759	5559	5527	6305	5354	5884	6250	6420	20	8.4	11.5175	12	5668.4
5619	4603	4388	5093	5298	5900	5108	5718	5952	6415	21	14.1	18.2587	18	5409.4
5680	4948	4475	5537	5399	6148	5152	5869	5570	6360	17	9.1	14.3658	14	5513.8
5690	4754	4788	5592	5339	6021	5206	5858	5938	6370	20	9.5	12.971	12	5555.6
4904	5306	5602	5258	5008	5573	5684	5830	5681	5878	13	8.6	17.5388	18	5472.4
5593	5299	5324	5342	5452	5896	5526	5688	5601	5463	19	8.8	12.5963	12	5518.4
5847	5048	4836	5513	5345	6304	5084	5798	6091	6455	20	8.4	11.5175	12	5632.1
5713	5192	5200	5656	5458	5770	5690	5584	6195	6136	34	12.4	11.4817	12	5659.4
5643	5736	5517	5717	5514	6056	5646	6032	6354	6134	19	11.3	16.0174	16	5834.9
5874	5096	5000	5565	5854	5780	5606	5672	5917	6115	15	9	15.9603	16	5647.9
5162	5175	5145	5483	5748	5925	5659	5853	5853	6252	27	10.8	11.611	12	5625.5
5346	5354	5381	5946	5932	5746	5816	5996	6165	5936	46	16.5	13.2751	14	5761.8
5391	5322	4682	5409	5261	5898	5423	5691	5887	5739	10	3.8	10.9311	10	5470.3
5694	4815	4539	5481	5163	5865	5157	5936	6215	6405	23	11.5	13.9297	14	5527
7656	4655	4774	5268	5158	6183	5325	6004	6247	6583	15	10	17.617	18	5785.3
5640	4673	4581	5150	5244	5953	5328	6139	5907	6498	24	10.5	12.3265	12	5511.3
5109	7472	7035	7996	7911	9036	7974	8675	8772	9293	38	15.2	13.2861	14	7927.3
5147	5537	5049	5450	5548	5719	5548	5743	5548	5909	24	13.2	15.4331	16	5519.8
5702	5430	5286	5670	5884	6012	5888	5804	6030	6158	14	4.9	9.67723	10	5786.4
5006	5102	4973	5123	5340	6132	5398	5523	5737	6107	21	10	13.0823	14	5444.1
5378	5168	5057	5452	5434	5854	5284	5713	5601	5942	23	10.7	12.9808	12	5488.3
5582	5046	4861	5366	5623	5729	5470	5600	5726	6028	19	9.6	13.6948	14	5503.1
5622	4790	4647	5286	4857	6144	5182	6104	6114	5978	39	19	16.4585	16	5472.4
5680	5667	5000	5478	5806	6042	5696	5934	6367	6609	26	15.8	17.3831	18	5827.9
5658	4823	4919	5327	5522	6158	5528	6001	6044	6239	22	9.8	12.3459	12	5621.9
5637	6015	5826	5934	5964	6366	5949	6193	6310	6608	30	13.4	13.4	14	6080.2
5683	4773	4688	5244	5214	5999	5253	5946	6106	6165	20	16.9	22.6239	22	5507.1
5718	5622	5512	5615	5425	5454	5552	5666	5530	5888	41	17.4	14.7046	14	5598.2
5611	4519	4490	5179	5373	5881	5122	5599	6293	6364	21	11	14.3499	14	5443.1
5646	5530	5582	5534	5730	5934	5699	6010	6213	6070	24	11.3	13.2483	14	5794.8
5698	4906	4882	5517	5429	6286	5292	5950	5943	6420	18	16.3	23.818	24	5632.3
5750	4752	4773	5353	5271	6073	5129	6013	6060	6333	20	10	13.6297	14	5550.7
4605	5195	5463	4810	4807	5609	5141	5503	5644	5650	21	12.3	15.9926	16	5242.7
5466	4829	4811	5185	5026	5262	5147	5238	5278	5376	14	9.7	18.2657	18	5161.8
6022	5816	5546	5593	5765	5682	5441	6358	5952	6164	22	11.1	13.9393	14	5833.9
5371	5054	5054	5669	5469	5752	5618	5550	5878	5881	21	16.3	21.0168	22	5529.6
5415	5197	4590	5291	5301	5730	5454	5748	5636	5862	24	14.6	17.0393	18	5422.4
5497	4675	4540	5415	5222	6052	5049	5837	6014	6177	32	16.4	15.7652	16	5447.8
5006	5342	5243	5409	5540	6192	5558	5625	5596	6346	23	11.2	13.574	14	5585.7
5490	5189	5017	5586	5648	5926	5410	5599	5972	6095	23	9.3	11.3165	12	5593.2
5546	4962	5326	5292	5484	5686	5367	5859	5574	5937	21	10.6	13.8433	14	5503.3
5722	5383	5178	5484	5589	5479	5706	5604	5414	5841	21	11.4	14.8559	14	5540
5344	4882	4518	5107	4947	6027	5336	6000	6195	6310	14	11.8	21.9184	22	5466.6
4879	4994	5157	5179	5115	5700	5207	5912	5357	6002	21	12.3	15.9926	16	5350.2
5830	5498	5534	5632	5216	5431	5651	5886	6015	5384	22	13.2	16.5034	16	5607.7
8468	7628	7398	8176	8113	8869	7961	8529	8915	9358	26	8.9	9.85447	10	8341.5
5316	5344	5176	5260	5477	5992	5407	6012	6036	6167	16	11.8	19.4072	20	5618.7
5607	5040	4716	5304	5058	6144	5204	6160	5568	5952	12	4.3	10.0626	10	5475.3
5607	5040	4716	5304	5058	6144	5204	6160	5568	5952	12	4.3	10.0626	10	5475.3
5771	4943	4819	5019	4860	5338	5297	5406	5362	5864	66	18.3	13.3496	14	5267.9
5920	6118	5838	5906	5802	6370	6089	6359	6424	6700	16	9	15.0286	16	6152.6
5200	5105	5195	5442	5198	4965	5239	5295	5511	5457	14	4.9	9.67723	10	5260.7
5808	5734	5550	5740	5870	5605	5918	6032	5979	6205	17	10	15.7124	16	5844.1
5277	5423	5097	5338	5560	5902	5886	5810	6129	6170	20	11.7	15.8612	16	5659.2
5960	5693	5629	5435	5715	5862	5725	6056	6055	5900	24	13.2	15.4331	16	5803
4849	5746	5351	5768	5558	5915	5798	5890	5497	6138	46	15.2	12.2037	12	5651
5880	4744	4750	5315	5156	6091	5167	5920	6067	6348	26	10.5	11.6047	12	5543.8
5856	4754	4788	5592	5339	6021	5206	5858	5938	6370	20	10.3	14.0244	14	5572.2
5456	5346	5520	5751	5722	6102	5396	6204	6109	6227	14	5	9.86082	10	5783.3
5415	5175	5190	5446	5210	5717	5534	5786	5766	6063	15	14.6	25.1184	26	5530.2
5913	5503	5433	5545	5704	5877	5878	6138	5806	6070	21	15.8	20.391	20	5786.7
5583	4265	4427	4833	4821	5943	4721	5863	5930	6470	27	10	10.7577	10	5285.6
5774	4731	4715	5343	5126	6158	5210	5961	6067	6212	13	13.3	26.2224	26	5529.7
5570	5436	5678	5306	5832	5762	5851	6013	5825	6148	46	15.3	12.286	12	5742.1
4729	5175	5134	5108	5397	5890	5598	5508	5999	6130	38	14.3	12.4875	12	5466.8
5249	5319	5361	5301	5235	5190	5525	5673	5917	5934	22	13.4	16.7471	16	5470.4
5335	5282	5506	5578	5409	5804	5767	5931	5789	6130	24	12.8	14.9736	14	5653.1
5780	5756	5677	5919	6026	6305	6248	5717	6282	6065	46	23.1	18.7451	18	5977.5
5862	5354	5590	6376	6010	6310	6265	5987	6129	6251	19	13.5	19.0032	20	6013.4
6005	5905	5681	6281	6127	6475	6399	6332	6277	6378	19	15	21.0278	22	6186
5950	5771	5663	6273	6233	6446	6156	6303	6380	6280	33	20.1	19.0026	20	6145.5
5351	5657	5752	5933	5916	6095	5571	5976	6090	6041	22	17.1	21.2389	22	5838.2
8338	5990	5559	5998	5974	6373	6229	6260	6172	6500	48	24.9	19.9421	20	6339.3
6005	5838	5720	6272	6118	6303	6304	6216	6139	6339	19	15	21.0278	22	6125.4
6159	5665	5372	6114	5615	6410	6054	6198	6367	6541	42	22.8	19.1728	20	6049.5
5955	5811	5606	6149	6176	6355	6173	6106	6098	6308	46	19	15.3415	16	6073.7
5590	5388	5711	6245	6059	6545	6312	5712	6092	6127	46	21.8	17.6641	18	5978.1
5643	5700	5812	6218	6165	6415	6309	6271	6272	6262	13	9.3	18.8517	18	6106.7
5896	5400	5582	6086	6046	6262	6075	6111	6308	6613	22	13	16.2597	16	6037.9
6117	5388	5711	6245	6059	6545	6312	5712	6092	6127	46	21.9	17.7472	18	6030.8
4885	5662	5854	6190	5956	6339	6274	6172	5312	5761	14	9.7	18.2657	18	5840.5
5827	5662	5854	6190	5956	6339	6274	6172	5312	5761	46	22.2	17.9965	18	5934.7
5609	5400	5710	5516	5709	6451	5134	6176	6164	6340	34	16.9	15.6907	16	5820.9
5893	5633	5506	6430	6070	6375	6082	6215	6247	6343	46	19.8	16.0043	16	6079.4
5590	5031	5346	6263	5945	6447	6222	6096	6335	5695	14	9.7	18.2657	18	5897
6005	5838	5720	6272	6118	6303	6304	6216	6139	6339	19	13.1	18.4618	18	6125.4
6005	5838	5720	6272	6118	6303	6304	6216	6139	6339	19	13.7	19.2736	20	6125.4
5904	5802	5491	6183	6171	6263	6370	6259	6191	6372	36	18.2	16.3963	16	6100.6
5988	5801	5524	5902	5865	6373	5883	6201	5268	6013	45	19	15.4715	16	5881.8
5757	5656	5736	5731	5055	6357	5996	5866	5098	6167	46	23.1	18.7451	18	5741.9
5840	5618	5491	6152	5526	6446	6274	6250	6171	6321	36	20.3	18.3129	18	6008.9
5929	5356	5449	6232	6164	6019	6240	5865	6042	6390	26	16.2	17.8182	18	5968.6
8338	5990	5559	5998	5974	6373	6229	6260	6172	6500	49	22.6	17.9261	18	6339.3
5949	8102	8149	8636	8678	9118	8948	8372	8784	8828	37	20.8	18.511	18	8356.4
7115	4948	4601	5324	5170	5847	4948	5925	5841	5969	31	11.1	10.8665	10	5568.8
5101	4017	4223	4860	4172	5180	4546	5649	6305	6283	23	14.7	17.7119	18	5033.6
5177	5121	5454	5934	5778	6434	6137	6168	6413	6491	28	21.3	22.2408	22	5910.7
5679	5037	5122	5594	5344	5624	5758	5936	6359	6274	16	12.6	20.6469	20	5672.7
5646	4571	4720	5277	4968	5529	5523	6049	5446	5906	16	11.8	19.4072	20	5363.5
5650	4328	4914	5347	4531	5654	5321	5900	6199	6453	17	12.8	19.8653	20	5429.7
5545	5455	5460	5481	5029	5743	5286	5706	5184	5777	19	13	18.3264	18	5466.6
5563	4524	5053	5578	5044	5482	5409	5690	6400	6410	18	10.9	16.2141	16	5515.3
5572	4536	4920	5411	4656	5916	5396	5529	6159	6470	18	11.6	17.2078	18	5456.5
5777	5558	5734	5977	5657	6274	6069	6094	6052	6072	18	12.5	18.4816	18	5926.4
5929	5214	5270	5952	5529	6260	6179	6023	6315	6621	14	12.8	23.6414	24	5929.2
5475	4567	4717	5219	5106	5857	5153	5761	6006	6376	16	12	19.7176	20	5423.7
5591	5320	5482	5405	5306	5914	5375	5898	5934	5630	19	15	21.0278	22	5585.5
5480	4319	4694	4938	4772	5651	5301	5417	6229	6445	29	14	14.3115	14	5324.6
4658	4597	4918	4926	4332	5088	5114	4895	5119	4854	19	13.8	19.4088	20	4850.1
5596	7466	7642	8346	7498	8815	8207	8706	8590	9251	20	13	17.5601	18	8011.7
5785	5513	5429	5752	5789	5770	5944	5808	6176	5993	23	17	20.4192	20	5795.9
5438	4376	4797	4890	4919	5218	5411	5159	6014	5902	30	19.4	19.4	20	5212.4
5856	5012	4993	5977	5809	6275	6047	6231	6327	6252	21	18	23.1405	24	5877.9
4775	3731	4154	4714	4480	5229	4623	4859	5543	6145	19	15	21.0278	22	4825.3
5946	5641	5842	5966	5926	6406	5998	6465	6592	6693	6	4.7	22.6534	22	6147.5
4767	5096	5282	5414	5166	5604	5485	5230	5750	5803	19	13.8	19.4088	20	5359.7
5295	4520	5036	5598	4691	5706	5562	5503	5615	5696	15	12.5	21.7156	22	5322.2
5354	3961	4727	4469	4234	5410	4330	5239	5369	5973	12	8.5	18.7588	18	4906.6
4986	5114	5351	5135	5095	5275	5463	5175	5545	5567	26	16.4	18.0357	18	5270.6
5550	5252	4946	5007	5519	5736	5686	5777	5913	6086	16	13	21.2651	22	5547.2
5585	4457	4748	5450	4582	5530	5408	5654	6330	6685	15	13.4	23.178	24	5442.9
5731	5433	5408	5919	5486	6253	6173	6348	6543	6594	6	4.7	22.6534	22	5988.8
5450	4571	4720	5277	4968	5529	5523	6049	5446	5906	19	12.4	17.5129	18	5343.9
6124	5276	5291	5824	5666	6030	6001	5903	6015	6618	27	18	19.2721	20	5874.8
5591	4082	4898	4993	4594	5422	5015	5418	6078	6337	13	8.3	16.9736	16	5242.8
6333	5163	5281	5602	5514	5611	5641	5810	5943	6097	21	12.2	15.8664	16	5699.5
6041	5021	4470	4701	5176	5585	5330	5413	5693	5982	12	8.5	18.7588	18	5341.2
5715	5216	5364	6252	5705	6245	6256	6372	5676	6748	15	13	22.5288	22	5954.9
4722	4644	4742	4554	4540	4819	4537	4765	5042	4939	14	9.7	18.2657	18	4730.4
6096	5049	4760	5771	5086	6145	5611	5629	5860	6302	18	12.7	18.7641	18	5630.9
5932	5032	5489	6038	5509	6110	6162	6154	6445	6550	6	4.9	23.4599	24	5942.1
5122	5190	5137	5430	5735	5704	5602	5971	6229	6161	20	12.7	17.1686	18	5628.1
5581	5480	5573	5631	5561	5726	5846	5733	5318	6089	6	4.8	23.0573	24	5653.8
4828	4943	5035	5128	5101	5696	4923	5204	5709	5770	12	8.9	19.5641	20	5233.7
5639	5136	5448	6015	5451	6138	6050	6093	6286	6475	15	11.8	20.5737	20	5873.1
5653	5010	4902	5274	5151	5495	5313	5084	5417	5757	14	11	20.5327	20	5305.6
6198	5068	5350	6075	5636	6012	6167	6041	6572	6695	32	18.6	17.8904	18	5981.4
5881	4309	4334	5202	4888	5919	4720	5743	6109	6138	17	14.9	22.9495	22	5324.3
5848	5139	5532	6118	5604	6124	6163	6147	6070	6383	6	4.9	23.4599	24	5912.8
8553	5124	5590	5701	5474	5641	5632	5830	6146	6174	14	10	18.7907	18	5986.5
5618	4172	4593	5182	4525	5595	5228	5839	6504	6159	18	10.6	15.7874	16	5341.5
5470	4227	4544	4927	4669	5655	4454	5725	6107	5992	11	5	12.6445	12	5177
5238	5078	5154	5273	5555	5637	5494	5561	5882	6136	13	9	18.29	18	5500.8
5317	4295	4488	4795	4823	5399	4913	5603	5872	6120	21	18	23.1405	24	5162.5
5329	4215	4348	4857	5009	5715	4892	5558	6056	6086	26	18.2	19.9921	20	5206.5
5668	5682	5754	5774	6030	5995	5849	6316	5942	6279	19	12.4	17.5129	18	5928.9
5539	4179	4498	5285	4761	5282	4722	5733	6473	6409	6	3.3	16.8347	16	5288.1
5335	4445	4282	5298	5048	5952	4920	5859	5782	6394	16	14	22.8059	22	5331.5
5458	4266	4650	5094	4119	5415	5053	5595	6293	6282	31	18.5	18.1328	18	5222.5
5551	5113	5402	5791	6006	5867	5875	6201	6211	6494	13	11	22.0093	22	5851.1
4839	4806	4633	4823	4758	5205	5144	5629	5391	5415	19	9.9	14.1058	14	5064.3
5663	5537	5215	5672	5465	5846	5818	5685	6109	6018	17	10.7	16.7555	16	5702.8
5469	4163	5056	5315	4295	5501	5010	5764	5659	6368	14	9.2	17.3883	18	5260
5850	4703	4607	5503	5202	6057	4974	5719	5796	6528	28	15.5	16.2115	16	5493.9
5563	4661	5027	5497	4912	5536	5366	5918	6425	6910	18	10.8	16.0719	16	5581.5
5439	4189	4547	5052	3949	5045	4981	5306	5778	6249	13	9.5	19.2253	20	5053.5
5316	5257	6020	6334	5809	6437	6247	6291	6723	6481	19	13.5	19.0032	20	6091.5
6254	5307	5726	6107	5620	6315	6375	6305	6713	6860	6	4.7	22.6534	22	6158.2
5038	4376	4529	5283	4900	5690	4947	5705	6061	6380	23	15	18.0655	18	5290.9
5684	4437	4405	5031	4816	5456	4962	5481	6208	6118	28	17.1	17.8758	18	5259.8
4786	4694	4732	4662	4456	4971	4557	4573	5253	5405	44	16.5	13.5115	14	4808.9
5614	5145	5158	5340	5152	5878	5117	5446	5760	5542	14	11	20.5327	20	5415.2
6013	5288	5565	6046	5607	6123	6061	6033	6243	6429	6	4.6	22.2481	22	5940.8
5566	5270	5318	5745	5393	5879	5604	5966	6122	6320	13	10.2	20.5285	20	5718.3
5641	5132	5123	5214	5072	5982	5238	5425	6172	6062	18	13	19.1874	20	5506.1
4982	4899	4958	4923	4861	5356	4990	5146	5233	5467	19	10.3	14.653	14	5081.5
4098	3971	3837	4380	4218	4223	4554	3993	4311	4025	26	19	20.8609	20	4161
5544	4410	4665	4979	4717	5873	5191	5472	6470	6646	18	12.6	18.6228	18	5396.7
5817	4615	4794	5398	4991	5406	5029	5660	6635	6397	21	17	21.892	22	5474.2
5312	4626	5118	5064	4704	5470	5106	5541	5979	5746	31	11.6	11.3572	12	5266.6
5587	5254	5511	5354	5422	5866	5587	5727	5409	5766	15	13.5	23.3401	24	5548.3
5555	5038	4870	5039	5125	5322	5125	5670	5183	5923	23	12.2	14.7588	14	5285
5745	4815	4922	5124	4780	5584	5092	5539	6233	6122	21	18.7	24.0131	24	5395.6
6043	5732	5932	5890	6037	6032	6193	6282	6394	6722	20	13.2	17.8209	18	6125.7
5416	4871	5194	5126	5240	5701	4979	5298	5994	6262	20	14.6	19.6431	20	5408.1
5772	5767	5914	5886	6003	6445	6440	6349	6742	6722	14	9.1	17.2124	18	6204
5615	4376	4529	5283	4900	5690	4947	5705	6061	6380	33	11.1	10.4521	10	5348.6
5564	5049	5306	5368	4865	5762	5312	5582	5938	6182	22	11.1	13.9393	14	5492.8
5463	4116	4449	5061	4555	5551	4771	5721	6549	6053	16	13	21.2651	22	5228.9
6187	5284	5624	6165	5733	6253	6178	6114	6625	6629	28	16.5	17.2518	18	6079.2
4674	4452	4655	4618	4514	5110	4928	5038	5074	5304	21	12.5	16.2448	16	4836.7
5334	4922	5043	5146	5337	4994	5330	5817	6126	6260	19	17.4	24.2511	24	5430.9
5216	4149	4298	4805	4717	5526	4805	5318	5938	6228	13	11.5	22.9306	22	5100
6128	5104	5242	5989	5483	6125	5878	5902	6217	6431	6	4	19.7851	20	5849.9
5502	5030	4840	5101	4935	5831	5254	5404	6126	5956	27	9.2	9.90371	10	5397.9
5318	4730	4966	5302	5198	5586	5344	5353	5850	5796	19	14.5	20.3538	20	5344.3
5765	4152	4904	5072	4639	5476	5340	5440	6067	6456	19	12.7	17.9198	18	5331.1
5364	4181	4576	4834	4641	5334	4901	5741	6071	6015	36	16.8	15.1201	16	5165.8
5350	4899	5102	5290	4893	5810	5495	5628	5870	6030	24	17	19.7865	20	5436.7
5568	5386	5472	5134	5011	5156	5539	6193	5800	6075	18	13.7	20.1736	20	5533.4
5256	4362	4840	5220	4366	5251	4775	5290	6112	5765	31	17.3	16.9539	16	5123.7
5326	4922	4798	5046	5008	5342	5260	5176	5528	5466	19	15.5	21.7009	22	5187.2
6092	5409	5654	5690	5560	6126	6110	6186	6481	6537	15	11.8	20.5737	20	5984.5
5139	4114	4278	4647	4642	5413	4639	5476	6044	6299	23	13.4	16.1778	16	5069.1
4660	4939	5200	5107	4990	5294	4936	4843	5342	5281	11	6.1	15.1367	16	5059.2
5503	4436	4319	5054	4866	5713	5157	5783	5924	6023	31	16.9	16.561	16	5277.8
5268	5280	5772	5807	5404	6408	6305	6142	6527	6359	26	16.3	17.927	18	5927.2
5760	5058	5351	5670	5774	5910	5437	5731	6419	5898	18	10	14.9323	14	5700.8
5536	4162	4863	5165	4658	5506	5277	5577	6093	6565	14	12.6	23.2975	24	5340.2
4699	5428	5482	6050	5483	6015	6160	5998	5881	6149	6	4.9	23.4599	24	5734.5
5386	5144	5205	4996	5298	5945	5218	5380	5684	5606	20	13.1	17.6905	18	5386.2
5318	4314	4496	5154	4804	5559	4775	5680	6429	6346	6	3.3	16.8347	16	5287.5
5492	5802	5634	5902	5849	5985	5711	6106	6408	6666	22	15.3	19.0571	20	5955.5
5577	5190	5194	5354	5464	5866	5643	5824	5866	5868	19	17.7	24.6527	24	5584.6
6021	4812	4967	4934	5283	5466	5504	5543	6234	5922	16	12.1	19.8727	20	5468.6
5421	5158	5290	5555	5237	5898	5178	6040	6034	6115	20	12	16.2538	16	5592.6
4578	4273	4604	4650	4326	5022	4274	4694	5247	5274	26	14.5	15.9681	16	4694.2
5454	3993	4442	5074	4651	5341	5081	5497	6190	6402	20	15.7	21.0706	22	5212.5
5450	4571	4720	5277	4968	5529	5523	6049	5446	5906	19	12.8	18.0554	18	5343.9
5970	5438	5760	5747	5626	6070	5741	5988	6540	6537	27	13.7	14.7006	14	5941.7
4888	4636	4669	5146	5061	5759	5016	5683	6282	6262	30	14.7	14.7	14	5340.2
7332	7714	8444	8925	8091	9158	8793	8967	8968	9256	20	16.9	22.6239	22	8564.8
5772	5767	5914	5886	6003	6445	6440	6349	6742	6722	19	8.4	12.0457	12	6204
5066	5563	5528	5622	5335	5814	5574	5896	5820	6106	18	11.4	16.9242	16	5632.4
5209	4970	4971	5361	5385	4770	5074	5585	6056	5694	20	19.1	25.4621	26	5307.5
4829	4774	4744	5194	5071	5722	5086	5100	6047	5379	24	15	17.4977	18	5194.6
5281	4316	5135	5541	4849	5790	5472	5931	6291	6338	18	9.6	14.361	14	5494.4
5362	4323	4490	4935	4640	5643	5016	5440	6059	6263	23	13.4	16.1778	16	5217.1
5447	4356	4671	4931	4624	5913	4925	5519	6008	6269	17	14.9	22.9495	22	5266.3
6098	5051	5548	5939	5377	6050	6242	6093	6426	6478	6	4.8	23.0573	24	5930.2
5464	5011	5254	5182	5314	5717	5519	5905	5930	6238	14	12	22.2638	22	5553.4
5283	4555	4589	5138	4804	5624	5125	5728	6231	6498	30	17.3	17.3	18	5357.5
6233	6224	6163	6160	6301	6628	6446	6677	6708	7289	16	13.3	21.728	22	6482.9
5874	4820	5439	6173	5762	6342	6238	5995	6352	6606	23	13.9	16.7682	16	5960.1
5585	6118	5838	5906	5802	6370	6089	6359	6424	6700	20	11.6	15.7303	16	6119.1
5882	5011	5223	5538	5001	5802	5298	5724	6100	5870	26	13.6	14.9877	14	5544.9
5079	4663	4773	4854	5058	5340	5098	5388	5654	5833	33	16.2	15.2933	16	5174
5527	5008	5441	5268	5338	5420	5374	5834	5852	5978	20	14.9	20.0328	20	5504
5671	4330	4724	5298	4423	5501	5089	5211	6110	6333	31	16.7	16.3646	16	5269
4931	4863	5255	5236	5111	5448	4756	5132	5534	5066	6	3.5	17.6871	18	5133.2
5337	4734	4971	5057	4846	5404	5194	5746	6214	5878	23	14.7	17.7119	18	5338.1
5398	5828	5966	6088	5930	6243	5774	6154	6609	6536	17	11.7	18.2398	18	6052.6
5332	5352	5268	5595	5495	5613	5559	5562	6146	6068	15	12.8	22.2038	22	5599
6016	4494	4953	5714	5166	5995	5498	5963	6289	6202	21	16.9	21.7671	22	5629
5573	4349	4444	5124	4756	6014	5121	5537	6134	6474	30	20.1	20.1	20	5352.6
5888	5817	5964	6130	6002	6342	6351	6414	6607	6856	6	4.5	21.8413	22	6237.1
5517	4985	5273	5163	5298	5182	5164	5700	5664	5924	16	13.3	21.728	22	5387
5225	5270	5414	5542	5398	5782	4822	5474	6159	5982	30	21.4	21.4	22	5506.8
5437	3982	4447	4710	4236	5522	4882	5160	5886	6205	22	14.9	18.5715	18	5046.7
5853	5310	5545	5274	5921	6131	6082	5849	5792	6178	19	13.3	18.7326	18	5793.5
5689	4113	4702	5136	4781	5660	4993	5289	6461	6176	6	3.3	16.8347	16	5300
5434	5518	4681	5718	5569	5573	5918	5731	6527	6057	41	15.6	13.1549	14	5672.6
5485	4634	4883	5724	5967	5768	5647	5948	5707	5849	38	12.4	10.8043	10	5561.2
5398	5542	5468	5515	5708	6002	5970	6153	6186	6426	30	13.7	13.7	14	5836.8
6444	6106	6060	6125	6134	6438	6319	6287	6902	6771	21	12.5	16.2448	16	6358.6
5643	4314	4730	5113	4631	5512	4490	5359	6518	6291	28	10.2	10.6915	10	5260.1
5340	5206	5179	5480	5501	5816	5578	5830	6100	6193	18	10.2	15.2176	16	5622.3
5610	4857	4814	5041	5010	5617	5174	5526	6110	6210	21	11.4	14.8559	14	5396.9
5459	5252	5347	5253	5666	5794	5979	6259	6240	6391	15	9	15.9603	16	5764
5856	4882	5070	5693	5425	6126	5986	5848	6208	6441	24	12	14.054	14	5753.5
5913	5922	6094	5895	5980	6370	6302	6413	6728	6914	17	14.5	22.3638	22	6253.1
5687	4821	5272	5098	5645	5260	5577	5340	5941	6075	18	13.4	19.7513	20	5471.6
5817	5350	5369	5547	5572	5853	5889	6030	6566	5963	20	7.6	10.4564	10	5795.6
4628	4580	4773	4838	4674	4770	5055	5269	4877	5411	34	12.6	11.6685	12	4887.5
5366	5691	5885	5842	5790	6271	5962	5989	6335	6398	25	14.2	16.089	16	5952.9
5514	4931	4928	5550	5535	5360	5280	5363	5635	6100	16	11.8	19.4072	20	5419.6
6197	5124	5268	6057	5590	6191	6075	6207	5907	6342	20	11.5	15.5993	16	5895.8
5510	5910	6030	5964	6064	6091	6135	6516	6675	6734	18	15.6	22.8395	22	6162.9
5884	6050	5981	5946	6086	6434	6214	6095	6548	6725	20	11.5	15.5993	16	6196.3
5295	4502	4799	5138	5259	5598	5358	4820	6252	6344	27	15.3	16.4028	16	5336.5
6374	4958	4919	5177	5410	5833	5426	5620	5759	5713	19	8.2	11.77	12	5518.9
6081	5013	5304	5894	5751	6062	6235	6161	6477	6396	19	11	15.6086	16	5937.4
5026	4780	4998	4811	4708	4926	4669	5025	5446	5409	22	13.1	16.3816	16	4979.8
5520	4917	5014	5327	5406	5698	5443	5800	5944	6406	26	14.9	16.4036	16	5547.5
4420	4400	4466	4526	4883	4939	4862	5554	5431	5554	15	11.8	20.5737	20	4903.5
5426	4971	5031	5092	5154	5556	5259	5613	5543	5382	24	12.8	14.9736	14	5302.7
5124	4174	4602	5142	4530	5593	4857	5765	5730	5877	20	14.1	18.9931	18	5139.4
5745	4816	4823	5006	5625	5783	5358	5840	5958	6086	19	11.5	16.2897	16	5504
5499	4351	4416	4882	4852	5550	4719	5908	6142	6091	29	19.1	19.5097	20	5241
5642	4846	5324	5535	5560	6213	5761	5900	6392	6678	16	11.7	19.252	20	5785.1
6022	4984	5119	6101	5432	6121	6206	6333	6238	6531	13	6.6	13.7391	14	5908.7
5169	5219	5041	5378	5284	5769	5346	5686	5479	5829	32	16.1	15.4755	16	5420
5494	4842	4838	5215	4931	5749	5488	5468	5699	5715	19	10.8	15.3358	16	5343.9
5441	5118	5042	5446	5609	5884	5258	5572	5954	6164	28	11.7	12.255	12	5548.8
5574	4994	5108	5320	5029	5237	5392	4938	5748	5893	6	3.9	19.3691	20	5323.3
5623	5043	5050	5512	5642	5702	5622	5996	6138	6366	19	12.6	17.7842	18	5669.4
5378	4913	5145	5548	5397	5715	5885	5851	6011	6127	15	10.8	18.9349	18	5597
5313	4629	4796	5309	5246	5893	5078	5639	5956	6339	21	13.5	17.5043	18	5419.8
6354	5442	5519	5487	5462	6138	5712	5809	6442	6450	15	14.6	25.1184	26	5881.5
5343	5742	5878	5866	5875	6204	6177	6195	6713	6670	14	13.5	24.8418	24	6066.3
5714	5138	5075	5458	5718	5910	5550	6073	6317	6162	18	14	20.5956	20	5711.5
5429	5326	5808	5419	6078	5846	6014	6318	6449	6102	21	8.2	10.791	10	5878.9
4917	4916	4875	5092	4948	5365	5050	5491	5668	5822	43	20.2	16.7762	16	5214.4
5672	7333	7454	8031	7771	8117	8017	8479	8613	9578	20	10.6	14.4187	14	7906.5
5004	5120	5303	5494	5287	5965	5407	5703	5954	6068	19	14	19.679	20	5530.5
5398	5662	5806	5996	5706	6085	5902	6046	6444	6251	17	9.3	14.6656	14	5929.6
5826	5870	6049	6022	6182	6229	6111	6289	6564	6814	16	13	21.2651	22	6195.6
4881	5350	5186	5454	5244	5484	5326	5774	6188	5818	29	14.5	14.8213	14	5470.5
5178	4851	4824	5158	5094	5734	5540	5316	6071	6081	22	16.6	20.6335	20	5384.7
5072	4842	5142	5470	5380	5533	5279	5978	5904	6052	12	5.8	13.2279	14	5465.2
5394	4978	4821	5554	5339	6066	5286	6123	6153	6582	13	9	18.29	18	5629.6
5429	5066	5292	5313	5311	5414	5334	5431	5534	5258	19	18.3	25.4552	26	5338.2
5090	4994	4865	5534	5320	5202	5558	5609	5942	6018	26	17.6	19.3402	20	5413.2
6036	4842	5246	5912	5363	6314	5862	6108	6448	6278	20	11.8	15.9921	16	5840.9
8848	5488	5613	5902	5330	6160	6085	6174	6447	6702	18	12.6	18.6228	18	6274.9
5557	4364	4380	4927	4651	5692	4822	5386	6308	6123	19	12.9	18.1909	18	5221
5629	4452	5010	5249	4914	5925	5502	5657	6097	6466	34	21	19.5342	20	5490.1
5156	4259	4503	4990	4616	5562	4729	5672	6129	6316	11	6.9	16.9219	16	5193.2
5536	5347	5614	5738	5386	5969	5003	6064	6258	6410	29	15.6	15.9428	16	5732.5
5474	4244	4690	4999	4787	5534	5002	5608	6340	5561	16	10.5	17.3825	18	5223.9
5518	4095	4422	4703	4753	5555	4769	5595	5710	5715	17	12.5	19.4227	20	5083.5
5198	5180	5175	5166	5020	5622	5332	5365	5530	5751	36	15.5	13.9362	14	5333.9
5667	4423	4518	5041	4704	5442	5465	5372	6259	6467	20	18.6	24.8181	24	5335.8
5484	4041	4408	4949	4602	5383	4656	5539	5991	6371	71	26.9	19.6749	20	5142.4
5342	4292	4511	5158	5050	5765	4950	5736	5888	6366	26	9.4	10.4018	10	5305.8
5740	4652	4371	5031	4949	5841	4599	5462	6232	6463	18	8.4	12.6405	12	5334
5509	4295	4493	5325	4548	5697	5387	5256	6361	6587	13	9.9	19.9709	20	5345.8
5511	4571	4720	5277	4968	5529	5523	6049	5446	5906	15	9.6	16.9556	16	5350
5687	4742	5266	5298	5763	5259	4820	5384	5506	6435	18	11.4	16.9242	16	5416
5219	5221	4906	5413	5493	5804	5452	5783	5886	5955	29	21.4	21.8527	22	5513.2
5568	5038	4989	5163	5057	5391	5017	5212	5090	5192	32	15.2	14.6065	14	5171.7
5491	5043	5326	5389	5399	6002	5294	5906	6031	5968	20	15.4	20.6816	20	5584.9
5823	5047	5306	5662	5271	6258	6004	5819	6316	6354	36	20.7	18.6782	18	5786
5850	4483	4614	5099	4847	5837	5162	5720	6174	5997	20	14.3	19.2532	20	5378.3
5319	4168	4531	4996	4190	4876	5159	5208	6080	6071	6	3.4	17.2619	18	5059.8
5458	4290	4679	5031	4712	5481	5199	5490	6145	6121	19	15.1	21.1625	22	5260.6
5568	4798	5580	5414	5041	5995	5686	5846	5722	5726	20	16	21.4593	22	5537.6
5361	4015	4426	4917	4472	5648	4931	5765	6256	6352	18	10.5	15.645	16	5214.3
5764	4381	4522	5264	4873	5959	4764	5820	5998	6483	6	3.5	17.6871	18	5382.8
4863	4818	4992	5129	5105	5384	5030	5361	5350	5414	30	12.5	12.5	12	5144.6
5545	4239	4484	5227	5057	5694	4779	5757	5962	6279	29	14.1	14.4135	14	5302.3
6182	5870	5920	6045	5901	6277	6268	6367	6431	6475	26	15.4	16.9479	16	6173.6
5343	4416	4554	5350	4451	5563	5533	5299	6288	6295	18	17.4	25.3518	26	5309.2
5981	5169	5196	5110	5006	5512	5366	5302	5390	5091	14	12.4	22.9534	22	5312.3
5360	4182	4685	4814	4889	5423	4323	5166	6093	6148	20	12.4	16.7768	16	5108.3
5878	5085	5072	5865	5615	6004	5902	6002	6172	6330	15	12.5	21.7156	22	5792.5
5725	4585	4798	5400	5142	6058	5226	5835	5929	6519	19	16.8	23.447	24	5521.7
5051	4758	4958	4994	5003	5431	5064	5477	5546	5321	15	12.2	21.2267	22	5160.3
5586	4362	4329	5270	5038	5989	5044	6007	6191	6422	20	11.1	15.075	16	5423.8
5211	5566	5850	5775	5560	6187	5665	6218	6454	6332	32	10.8	10.3619	10	5881.8
5576	4400	4440	5257	4950	6048	5153	5590	6046	6449	27	19.3	20.6523	20	5390.9
5600	5319	5609	5686	5747	6131	5739	6275	6258	6092	21	13.7	17.7559	18	5845.6
5051	4758	4958	4994	5003	5431	5064	5477	5546	5321	46	17.6	14.1834	14	5160.3
6011	4334	4267	5067	5128	5897	4918	5684	5875	6205	21	15	19.3885	20	5338.6
6115	5614	5706	5915	5980	6187	6000	6327	6686	6704	15	11.7	20.4102	20	6123.4
5038	4748	5254	5133	5466	5646	5341	5498	5954	6046	18	14	20.5956	20	5412.4
5377	4130	4405	4601	4398	5337	4771	5682	6013	6186	30	16.1	16.1	16	5090
5631	4634	4534	5169	5157	6051	5042	5918	6093	6623	14	9.6	18.0905	18	5485.2
5853	5677	5658	5705	5877	6112	5918	6045	6447	6647	19	14	19.679	20	5993.9
4867	5061	4786	5026	5082	5434	5218	5256	5885	5899	56	19.7	14.9499	14	5251.4
5521	4379	4243	5053	4937	5943	4949	5794	6204	6257	27	18.1	19.3783	20	5328
5790	5122	5200	5461	5632	5866	5572	5629	5908	6030	31	21.8	21.3757	22	5621
5700	4625	4741	5517	5157	5492	5221	5582	5834	6259	36	22	19.8662	20	5412.8
5266	4878	5066	4962	5484	5258	4838	5619	5581	5893	20	13.6	18.3422	18	5284.5
5611	4143	4454	4784	4693	5392	4991	5477	6022	6319	28	13.7	14.3381	14	5188.6
5655	5188	4916	5297	5550	5881	5503	5933	6320	5635	21	14	18.133	18	5587.8
8203	4416	4554	5350	4451	5563	5533	5299	6288	6295	20	13.7	18.4724	18	5595.2
5328	5252	5002	5598	5202	6011	4952	5622	5926	5334	29	15.3	15.6369	16	5422.7
5407	4852	5030	4811	5002	4821	4928	5005	5514	5350	29	13.5	13.8017	14	5072
5773	4853	4761	5415	5332	6226	5543	5972	6251	6536	20	14.5	19.5132	20	5666.2
5275	5243	5112	5332	5282	5758	5204	5156	5773	6086	25	15.5	17.5399	18	5422.1
6410	6140	6210	6219	6298	6533	6318	6825	6950	6979	19	12.9	18.1909	18	6488.2
4760	4944	4878	5141	4890	5434	5450	5236	5309	5398	32	17.7	17.0209	18	5144
5762	7324	7230	8296	7886	8661	8145	8675	8765	9279	19	17.1	23.8491	24	8002.3
5493	4629	4796	5309	5246	5893	5078	5639	5956	6339	17	10.4	16.3089	16	5437.8
5651	5686	5588	5710	5749	5930	5946	5954	6187	6333	21	14.1	18.2587	18	5873.4
5608	4423	4410	5078	4897	5870	5227	5625	6106	6622	27	15.5	16.6154	16	5386.6
5838	5074	4944	5190	5602	5368	5734	5957	6356	5718	21	9.4	12.32	12	5578.1
5290	4997	5012	5323	5002	5696	5390	5388	6015	5875	17	14.1	21.7773	22	5398.8
5282	4858	4780	5160	5090	5237	4742	4647	4900	5110	27	19.8	21.183	22	4980.6
5294	5610	5632	5881	5519	6064	6381	5724	6258	6049	22	16.2	20.1488	20	5841.2
5606	4893	4790	5326	5470	5842	5227	5205	5848	6222	36	15.6	14.0272	14	5442.9
5844	5284	5672	5986	5514	6349	6231	5871	6622	6573	26	13.4	14.7697	14	5994.6
8692	7570	8330	8882	8189	8919	8780	8034	9216	9343	28	15	15.6912	16	8595.5
4500	4520	4522	4666	4612	4905	4701	5018	5166	5229	17	17.4	26.5932	26	4783.9
5527	4150	4419	4877	4639	5181	4957	5550	6211	6103	11	7.2	17.5862	18	5161.4
5183	4436	4592	4566	4787	5360	4995	5416	5230	5494	21	14.3	18.5099	18	5005.9
6017	4442	4693	5033	4623	5646	5291	5215	6320	6389	68	24.9	18.2805	18	5366.9
5939	5509	5530	5734	5421	5528	5934	5771	6226	6144	30	24.5	24.5	24	5773.6
5452	4186	4746	5055	4719	5284	5199	5317	6132	6160	18	12.5	18.4816	18	5225
5756	4358	4616	4996	5141	5532	5050	6023	5925	5982	26	16.2	17.8182	18	5337.9
6069	4895	4920	5938	5231	6303	6386	6240	6439	6595	28	15.9	16.6276	16	5901.6
5494	3702	4278	5134	4008	5021	4915	5192	5770	6432	19	10.8	15.3358	16	4994.6
5266	4845	4819	5069	5392	5494	5510	5470	5750	6046	21	14.7	19.0121	20	5366.1
5406	5107	5077	5190	5618	6062	5579	6089	6078	6174	20	14.6	19.6431	20	5638
5799	5006	4623	5205	5127	5533	5060	5588	5604	5948	18	14.8	21.7189	22	5349.3
5226	5357	5146	5282	4878	5695	5571	5622	5624	5556	28	11.7	12.255	12	5395.7
5659	4544	4404	5320	4984	5999	5004	5368	5931	6187	24	14.3	16.6953	16	5340
5785	5486	5598	5955	5574	6126	5638	5789	6166	6501	26	13.4	14.7697	14	5861.8
5024	5394	5170	5567	5429	5672	5641	6014	5930	6372	31	19.1	18.7223	18	5621.3
5355	3945	4912	4990	4479	5677	4865	5712	5634	6100	19	16	22.3731	22	5166.9
5203	4482	4744	5499	5289	5897	5406	5752	6023	5991	28	14.1	14.7545	14	5428.6
5924	5053	5440	6170	5328	6097	6083	6190	6444	6074	18	13	19.1874	20	5880.3
5039	5025	5331	5706	5284	5371	5931	5565	5364	5605	20	14.2	19.1231	20	5422.1
5823	4752	4928	5464	5056	5839	5404	5685	6286	6406	15	9.4	16.6243	16	5564.3
5811	4700	4968	5217	5123	5971	5375	5513	6115	6596	11	6.6	16.2549	16	5538.9
4881	5350	5186	5454	5244	5484	5326	5774	6188	5818	28	9.8	10.2744	10	5470.5
5168	5173	5198	5237	5197	5638	5274	5783	5869	6132	20	14	18.8629	18	5466.9
5738	5314	5571	5830	5629	5882	5987	5667	6026	6094	18	15.3	22.4196	22	5773.8
5888	5291	5568	6053	5646	6450	6130	6316	5902	6481	18	14.9	21.8591	22	5972.5
5538	4197	4554	5402	5177	5574	5156	5445	5819	6199	27	22.8	24.3647	24	5306.1
5546	5440	5357	5882	5944	6142	6210	6040	5725	6494	20	15.3	20.5519	20	5878
5637	5104	5374	5430	5422	5326	5499	5265	5849	5410	28	15.7	16.4196	16	5431.6
5610	5214	5435	5852	5578	5834	6002	5313	6134	6396	20	16.8	22.4946	22	5736.8
5875	4895	5060	5780	5216	6099	5989	5797	6149	6449	13	10.5	21.0848	22	5730.9
5546	5288	5565	6046	5607	6123	6061	6033	6243	6429	37	19	16.8876	16	5894.1
4719	3958	4145	4828	4981	5633	4740	5080	5470	6052	20	12.5	16.9074	16	4960.6
5432	4686	4974	4881	4694	4547	5012	5057	5310	5154	30	18.3	18.3	18	4974.7
5546	5060	5159	5174	5198	5509	5394	5771	5930	5856	20	15.6	20.941	20	5459.7
8409	5387	5575	6081	5513	6085	6263	6216	6485	6620	19	11.6	16.4258	16	6263.4
5518	4705	4538	5027	5060	5988	5308	6181	6093	6137	17	10.5	16.4578	16	5455.5
5255	4796	4803	5028	4921	5293	5243	5428	5650	5596	24	17.6	20.4722	20	5201.3
4730	5434	5266	5341	5554	5947	6082	5950	5878	6266	51	20.5	16.0053	16	5644.8
5590	4652	4504	5083	4784	5649	5022	5774	6007	6426	19	9.9	14.1058	14	5349.1
5533	4587	4657	5115	4831	5704	5305	5625	6162	5927	17	12.7	19.7178	20	5344.6
6030	5402	5593	5936	5849	6437	6200	6276	6666	6232	22	17.2	21.3599	22	6062.1
5425	3809	4219	4759	4556	5050	4400	4994	5913	6129	36	18.4	16.5787	16	4925.4
5576	4393	4831	5197	5172	5705	5044	5498	6359	6487	17	12.7	19.7178	20	5426.2
5176	4791	4857	5387	5061	5943	5461	4986	5562	5811	24	15.9	18.5283	18	5303.5
6115	5277	5266	5765	5752	6501	6070	6270	6019	6864	26	17.3	19.0142	20	5989.9
5568	4367	4496	4732	5066	5988	4687	5608	6429	5990	24	18.7	21.7282	22	5293.1
5890	4878	5181	5911	5291	5865	5932	6005	6028	6263	18	11.9	17.6329	18	5724.4
5169	4789	4508	5056	4795	5712	4860	5402	6079	5971	36	18.1	16.3051	16	5234.1
5530	5254	5518	5549	5950	5755	5640	6471	6175	6248	26	14.6	16.077	16	5809
5648	4597	4816	5211	4775	5756	5336	5471	6234	6512	27	11.4	12.2508	12	5435.6
5257	5077	5158	5028	5090	4956	5310	5153	5287	6060	13	11.6	23.1145	24	5237.6
5363	4419	4667	5271	5149	6053	5303	5888	6200	6312	13	10.2	20.5285	20	5462.5
4912	4424	4586	4812	4569	5090	5070	4662	4684	4842	21	12.5	16.2448	16	4765.1
5499	4972	5128	5178	5323	5422	5647	5390	5574	5898	10	3.8	10.9311	10	5403.1
5891	4212	4405	5205	5023	5861	4654	5642	6010	6190	31	14.4	14.1058	14	5309.3
5870	4629	5093	5631	4837	5870	5561	5815	6066	6520	13	12.2	24.2152	24	5589.2
5855	5761	6043	6297	5924	6242	6260	6150	6442	6058	24	10	11.7498	12	6103.2
4936	4422	4608	5394	5097	5984	5078	5629	6056	6144	21	12.9	16.749	16	5334.8
5158	5070	4981	5708	5470	5843	5250	5912	5657	6099	18	10.2	15.2176	16	5514.8
5890	5012	5464	5951	5560	6348	5880	6199	5777	6505	27	18	19.2721	20	5858.6
5450	4916	5025	5285	5043	5602	5521	5426	5879	5775	19	17.2	23.9831	24	5392.2
5233	5277	5265	5489	5254	5039	5584	5631	5898	6219	22	16.9	20.9968	20	5488.9
5739	4798	4604	5143	4918	5222	5214	5039	4989	5317	34	19.8	18.4086	18	5098.3
5491	5399	5558	5518	5697	5822	5614	6113	6215	6286	33	15.6	14.7232	14	5771.3
6024	5240	5586	5743	5456	5757	5919	5830	6075	5878	16	12	19.7176	20	5750.8
5726	4557	4789	5170	4975	5838	5589	5717	6397	6382	38	12.7	11.0698	12	5514
5122	5267	5467	5671	5456	5692	5696	5725	5398	6034	18	12.6	18.6228	18	5552.8
5463	4957	5425	5388	5336	5394	5602	5507	5722	5969	11	7.2	17.5862	18	5476.3
5029	4635	4910	4979	5018	5726	5171	5284	5474	5335	20	16.1	21.5888	22	5156.1
5498	5063	5176	5472	5206	5501	5865	5274	5953	6192	36	15.6	14.0272	14	5520
5502	4483	4993	5220	5334	5937	5449	5853	6066	6380	15	9	15.9603	16	5521.7
5623	6181	6173	6418	6149	6727	6393	6040	6542	6680	30	13	13	12	6292.6
5784	5124	5351	5323	5307	6039	5354	5608	5899	6145	28	14	14.6504	14	5593.4
5434	5365	5777	5666	5437	5572	6222	5771	5352	6129	29	13.8	14.1076	14	5672.5
5714	5138	5075	5458	5718	5910	5550	6073	6317	6162	35	18.5	16.9203	16	5711.5
5767	5339	5270	6145	5595	6352	6247	6016	6524	6533	28	16.5	17.2518	18	5978.8
5333	4976	4981	5353	5130	5678	5354	5348	6086	5942	17	12.9	20.0127	20	5418.1
5584	5623	5349	5650	5606	6043	6181	5728	6264	6129	18	13.6	20.0329	20	5815.7
5209	5102	5213	5539	5238	5621	5588	5785	5594	5878	16	10.2	16.9133	16	5476.7
5506	5206	5179	5480	5501	5816	5578	5830	6100	6193	20	13.1	17.6905	18	5638.9
5534	5407	5534	5571	5588	5947	5642	5605	6053	6460	23	18.6	22.2977	22	5734.1
5217	4570	4361	4892	4843	5446	5134	5233	5785	5696	31	11	10.7684	10	5117.7
5773	4922	5426	5298	5243	5728	5250	5779	5845	5922	12	7.3	16.3228	16	5518.6
5212	5000	4783	4728	5440	5397	5081	5708	5362	6110	38	19.2	16.8437	16	5282.1
5503	4130	4587	5164	4376	5269	5128	5646	6074	6553	16	13.2	21.5738	22	5243
5795	4359	4655	5453	4925	5717	5320	5857	6274	6493	22	11	13.8169	14	5484.8
5414	4077	4395	4635	4693	5705	4715	5031	5774	5999	13	12.1	24.032	24	5043.8
6062	5215	5277	5958	5417	6275	6008	6371	6383	6502	18	10.4	15.5026	16	5946.8
8555	4924	5340	6323	5564	6359	6137	6148	6226	6634	21	13.4	17.3785	18	6221
5549	4396	4609	5397	4962	5970	5562	5799	6064	6149	14	10.4	19.4889	20	5445.7
5817	4915	5710	5764	5419	6299	6123	6237	6344	6576	28	18	18.8116	18	5920.4
5289	5414	5542	5274	5424	5658	5608	5696	5418	5863	25	16	18.0974	18	5518.6
5427	4744	5108	5611	5328	5905	5896	5840	6300	6463	22	15.5	19.2999	20	5662.2
8772	7502	7992	8568	8301	9091	8665	8942	8262	9420	34	23.4	21.7873	22	8551.5
5570	4873	5206	5437	5198	5665	5066	6041	6298	5357	29	16.6	16.9621	16	5471.1
5389	4600	5238	5365	5103	5716	5513	5583	6345	6482	13	9.4	19.0386	20	5533.4
5630	4109	4694	5150	4620	5584	5239	5194	6286	6282	43	20.1	16.6913	16	5278.8
5276	4145	4222	4845	4528	5184	4773	5219	5911	6380	17	11	17.2015	18	5048.3
5486	5210	5232	5411	5062	5391	5653	5139	5274	5806	32	16.6	15.9583	16	5366.4
5712	5109	5538	6134	5610	6034	6057	6135	6676	6339	28	14.6	15.2749	16	5934.4
6120	5152	5406	6026	5476	6334	6117	6028	6511	6600	40	20.6	17.6614	18	5977
5395	5005	4810	4844	5148	5702	5580	5895	5901	5528	31	11.5	11.259	12	5380.8
5795	5969	6170	6213	6186	6235	6204	6467	6944	6874	16	9	15.0286	16	6305.7
5714	5094	5137	5881	5139	5935	5963	6016	6228	6165	24	17.6	20.4722	20	5727.2
5625	4367	4545	4876	4582	5467	5207	5270	6269	6606	19	11.7	16.5619	16	5281.4
5619	5110	5567	5338	5369	5407	5347	5220	5682	5784	27	14.4	15.4455	16	5444.3
4680	4774	5114	5338	5017	5287	5208	5084	5231	5682	20	14.1	18.9931	18	5141.5
5761	4525	4662	5329	4948	5740	5150	5750	6130	6557	47	22.3	17.9386	18	5455.2
5854	5164	5162	5794	5242	5482	5646	5577	5967	6128	11	5	12.6445	12	5601.6
5935	4895	5263	5789	5674	5838	5881	5780	6219	6198	16	14.5	23.574	24	5747.2
4888	4650	4574	5156	4536	5000	4496	4749	5010	5373	10	4.3	12.2091	12	4843.2
5595	4455	4519	5158	5079	5868	5077	5526	6029	6509	33	19.3	18.2413	18	5381.5
5550	5077	5170	5234	5159	5834	5002	5385	6058	5991	20	14.2	19.1231	20	5446
5522	5022	4956	5681	5362	5748	5716	5317	6042	5950	18	12.9	19.0464	20	5531.6
5443	5288	5303	5404	5385	5539	5890	5634	5277	6109	34	17.6	16.3464	16	5527.2
5462	4043	4621	4891	4346	5535	4769	5412	5395	6002	18	14.3	21.0172	22	5047.6
5498	4678	4707	5043	5079	5674	5551	5323	5929	5836	29	18	18.3889	18	5331.8
5833	5279	5379	6104	5686	6392	6284	5957	6703	6618	31	18.1	17.7399	18	6023.5
5030	4153	4465	4895	4724	5721	4834	5672	6371	6543	28	18.1	18.9155	18	5240.8
5290	4806	5018	5023	4868	5490	5145	5345	5488	5593	18	11.4	16.9242	16	5206.6
5448	5312	5092	5487	5347	5620	5566	5573	6107	5908	26	14.3	15.7503	16	5546
4954	4211	4429	5097	4605	5492	5127	5785	6481	6125	31	13.5	13.2222	14	5230.6
5245	5086	5346	5842	5451	5758	5581	5384	5769	5061	28	18	18.8116	18	5452.3
5787	5019	5144	5932	5752	6061	5605	5950	6387	6072	18	12.6	18.6228	18	5770.9
5851	4866	4651	4963	5497	5738	5144	5251	5641	5714	6	3.5	17.6871	18	5331.6
5456	4292	4520	4894	4711	5390	4996	5624	6199	6301	12	9.2	20.166	20	5238.3
5185	5027	5010	5518	5488	5620	5266	5589	5473	5573	19	13.4	18.8679	18	5374.9
5554	5011	4934	5100	5341	5645	5517	5534	6037	6230	32	15.8	15.1858	16	5490.3
5823	4666	4750	5647	5143	5822	5531	6044	6357	6404	27	22.4	23.9407	24	5618.7
5410	4783	4841	4858	5332	5457	5400	5546	5886	5704	30	17.9	17.9	18	5321.7
5235	5023	5198	5020	5294	5747	5249	5405	5968	6019	35	17	15.5344	16	5415.8
5278	5081	5205	5506	5363	5666	5445	5894	5697	6328	29	15	15.3311	16	5546.3
5706	5538	5497	5767	4902	6022	5938	6009	5972	6060	30	19.9	19.9	20	5741.1
5678	4283	5152	5120	4766	5818	5438	5622	6322	6317	66	27.8	20.5992	20	5451.6
5889	5114	5746	5457	5838	5592	5512	6187	6000	6465	13	11.5	22.9306	22	5780
5989	4713	4827	5709	5163	6015	5584	5614	6308	6352	19	11.2	15.8812	16	5627.4
5724	4939	4911	5827	5266	6274	5573	6152	6313	6542	27	23.5	25.1066	26	5752.1
5432	5333	5136	5191	5749	5695	5882	6072	5765	5848	14	10.7	20.0113	20	5610.3
5294	4602	4963	5041	4418	5388	5164	4573	4938	4942	28	15.2	15.8993	16	4932.3
5652	5077	5275	5283	5227	5334	5359	5648	5617	5988	31	14.9	14.5968	14	5446
4818	4807	4764	4942	4799	5338	4943	5315	5227	5445	34	18.5	17.1897	18	5039.8
5419	4361	4429	5253	4650	5486	5216	5465	6406	6414	43	19.4	16.0973	16	5309.9
5674	4904	4801	5547	5273	6258	5639	5685	6322	6403	18	16.6	24.2367	24	5650.6
5084	3988	4600	4663	4731	5496	4829	5547	5999	5791	38	22.8	20.0556	20	5072.8
5711	5192	5192	5977	5536	6254	5852	6062	5961	6433	39	16.9	14.6101	14	5817
5917	5292	5196	6181	5650	6120	6167	6267	6044	6369	28	19.1	19.955	20	5920.3
4721	4266	4384	4984	4715	5656	4723	5506	5780	6140	12	5.8	13.2279	14	5087.5
5664	4461	4504	5068	4955	5967	5000	5758	6207	6234	19	15.8	22.1043	22	5381.8
5552	4392	4543	5145	4936	5981	5094	5438	6078	6575	26	15.5	17.0567	18	5373.4
5611	4695	5024	5450	5047	5781	5810	5582	5678	6438	35	19.3	17.6599	18	5511.6
5558	4351	4686	5342	5191	5720	5156	5626	6371	6599	21	8.2	10.791	10	5460
5013	5068	5198	4829	5096	5448	5202	5686	5766	5915	19	10.8	15.3358	16	5322.1
5975	5090	5516	6020	5734	6551	6087	6255	6291	6918	30	20.8	20.8	20	6043.7
5447	5609	5216	5606	5649	5877	5988	5984	5743	6215	28	13.7	14.3381	14	5733.4
5021	4171	4653	4626	4157	5384	4384	5519	5553	5606	48	22.6	18.0522	18	4907.4
5466	4157	4721	5064	4450	5733	4872	5791	5709	6122	19	9.4	13.4205	14	5208.5
4474	4658	4673	4680	4632	5272	4948	4864	4741	5292	48	24.8	19.8598	20	4823.4
5500	4189	4547	5052	3949	5045	4981	5306	5778	6249	22	7.8	9.88366	10	5059.6
8595	7642	8088	8570	8018	9055	8818	8642	9112	9434	37	19.2	17.0679	18	8597.4
4979	4010	4104	4645	4208	4617	4782	4734	5602	5761	28	17.7	18.4997	18	4744.2
5472	5281	5364	5918	5407	5980	6042	5590	6002	5830	38	20.3	17.8242	18	5688.6
5662	4556	4904	5479	4865	5617	5017	5337	6183	6781	15	7	12.6105	12	5440.1
5679	4597	4816	5102	5180	5985	5291	5700	6017	6643	21	14.3	18.5099	18	5501
5608	5396	5322	5350	5767	6050	5655	5980	5878	6048	16	7.3	12.3338	12	5705.4
5526	4626	4747	4671	4520	4893	4655	5027	5376	5380	14	8.7	16.5075	16	4942.1
5305	4133	4637	5370	4360	5514	5309	5611	6246	6374	26	19.4	21.2951	22	5285.9
5543	5721	5854	5736	5194	5942	6374	6136	5874	6205	10	3.2	9.37367	10	5857.9
5630	4244	4808	5276	4976	5475	5548	5578	6310	6534	27	12.3	13.2098	14	5437.9
5857	4791	5122	5665	4860	5912	5673	5611	6493	6621	21	16.9	21.7671	22	5660.5
5928	4801	5439	6149	5334	6079	6217	6165	6464	6523	42	20.1	16.8575	16	5909.9
5290	5698	5727	5815	5860	5822	6337	5913	6277	6323	18	10.4	15.5026	16	5906.2
5588	3982	4617	5052	4388	5412	4785	5474	6371	6263	18	17.8	25.9085	26	5193.2
5917	4799	5189	5562	4924	5528	5449	5412	6093	6489	15	10.6	18.606	18	5536.2
5435	3957	4497	4967	4680	5462	4817	5244	5984	5945	20	13.9	18.7328	18	5098.8
5818	5791	5939	6047	5813	6179	6193	6308	6381	6175	21	8.6	11.3013	12	6064.4
5690	4344	4515	5108	4730	5693	5079	5642	5613	6561	12	9.6	20.9659	20	5297.5
5776	4715	4900	5415	4929	5887	5585	5361	6112	6432	12	7.3	16.3228	16	5511.2
5579	4707	4398	5349	5186	6039	5180	6071	6129	6242	20	13.6	18.3422	18	5488
7449	6518	6851	7335	6795	7845	7381	7732	8568	9195	25	9.8	11.163	12	7566.9
5917	4318	4811	5435	4956	5757	5356	5337	6190	6380	12	8.2	18.1528	18	5445.7
8687	5326	5559	5883	5654	5706	6302	5803	6310	6214	19	15.1	21.1625	22	6144.4
5830	4822	4860	5471	5232	6091	5364	5879	6068	6162	21	14.7	19.0121	20	5577.9
5550	5252	4946	5007	5519	5736	5686	5777	5913	6086	28	19.2	20.0589	20	5547.2
5385	4667	5301	5763	5425	5680	5389	6171	6245	6092	13	6.3	13.1619	14	5611.8
5373	4886	4931	4998	5069	5593	5352	5605	5683	5439	14	13.8	25.3549	26	5292.9
5619	4463	4845	5034	4725	5765	5304	5809	6098	6525	24	15.7	18.2993	18	5418.7
5246	5202	5200	5679	5870	5565	5878	6163	6197	5834	12	8.1	17.9503	18	5683.4
5324	4154	4647	4979	4336	5153	4984	5202	5690	5778	33	17.5	16.5292	16	5024.7
5666	5239	5344	5776	5606	6242	5960	6085	5848	6420	21	12.5	16.2448	16	5818.6
6290	5102	5152	5883	5845	6346	6035	6231	6610	6541	14	12.7	23.4695	24	6003.5
5277	3870	4314	4935	4066	5259	4818	5178	5745	6110	20	10.3	14.0244	14	4957.2
5761	4296	4686	5315	4864	5552	5159	5614	6205	6066	13	9.9	19.9709	20	5351.8
5551	4942	5123	5615	5292	6274	5325	5979	6221	6477	18	16	23.3989	24	5679.9
5496	4519	4354	5131	4735	5976	4908	5393	5825	6188	33	19.1	18.051	18	5252.5
5817	5135	5275	5968	5376	6307	5730	5979	6556	6794	38	16.5	14.4409	14	5893.7
4898	5081	4929	5285	5290	5521	5422	4997	5259	6017	19	12.1	17.1056	18	5269.9
4938	4864	5006	5244	5174	5343	4595	5196	5427	5074	23	14.7	17.7119	18	5086.1
5021	4257	4737	4868	4331	5479	4919	5735	6025	5956	21	19.9	25.5069	26	5132.8
5393	4399	4518	4984	4339	5353	4741	5355	6485	6032	16	9.6	15.9726	16	5159.9
5862	5344	5123	5606	5558	5691	5366	6031	6318	5658	20	12.4	16.7768	16	5655.7
5872	4916	5319	5806	5027	6116	5996	5903	6723	6581	16	14.6	23.7275	24	5825.9
6085	5917	6003	6073	6222	6691	6131	6878	6806	6860	21	11.1	14.4764	14	6366.6
4910	4961	5191	5976	5456	5971	5936	5942	6533	6440	23	15	18.0655	18	5731.6
5124	4896	4923	4987	4874	5412	5142	5116	5212	5582	20	14.2	19.1231	20	5126.8
5961	4984	5119	6101	5432	6121	6206	6333	6238	6531	16	14.3	23.267	24	5902.6
5570	5498	5582	5560	5368	6013	4962	5780	5999	6048	21	14.3	18.5099	18	5638
5508	4462	4509	5296	4889	5938	4933	5605	6028	6319	20	14.6	19.6431	20	5348.7
5444	4262	4654	5013	4726	5554	4661	5914	6143	6271	15	8.6	15.2944	16	5264.2
5646	5248	5302	5845	6010	5765	5791	6215	6417	5948	19	14.2	19.949	20	5818.7
5608	5014	4971	5227	5090	5606	5609	5278	4821	5370	25	17.7	19.9912	20	5259.4
5259	4722	4451	4814	4586	4646	4961	4594	5151	5112	28	14.3	14.9627	14	4829.6
5871	4692	4992	5228	4877	5522	5017	5233	5591	6028	24	15.6	18.1849	18	5305.1
5208	5208	5037	5282	5138	5677	5317	4956	5458	6116	35	18.1	16.5506	16	5339.7
5398	4063	4560	4822	4580	5652	4957	5396	6192	5818	18	14.6	21.4383	22	5143.8
5971	5170	5330	6126	5421	6005	6098	6107	6556	6680	17	17.3	26.4479	26	5946.4
5168	4805	5054	5229	5124	5327	5425	5206	5413	5175	34	18.1	16.8149	16	5192.6
5510	4115	4366	4764	4381	5763	4552	5498	6125	6215	15	9.6	16.9556	16	5128.9
5482	4023	4638	4948	4720	5289	4498	5480	6196	6289	6	3.3	16.8347	16	5156.3
5503	4658	5230	4791	4895	5230	4863	5287	6178	5813	56	23.9	18.2532	18	5244.8
7894	6140	6683	7635	6696	7517	7586	6877	8459	8465	17	13.1	20.3073	20	7395.2
5391	4931	5479	5714	5431	6018	5790	5782	5969	6441	29	14	14.3115	14	5694.6
6252	5261	5359	6185	5857	6578	6410	6201	6702	6753	18	12	17.7745	18	6155.8
5613	5058	5039	5390	5415	5200	5490	5286	5771	5869	31	18.1	17.7399	18	5413.1
5096	5168	5117	5391	5498	5549	5766	5639	5022	5934	27	15.2	16.2964	16	5418
5490	5054	5326	5327	5160	5467	5482	4888	5838	6008	14	7.5	14.3787	14	5404
4868	4888	4894	4915	4822	4981	4938	5183	5162	5530	18	13.6	20.0329	20	5018.1
6004	5313	5670	5985	5487	5897	6150	5837	6274	6146	37	22.4	19.9557	20	5876.3
5383	5604	5804	6157	5751	6040	6386	5788	6055	6158	21	15.6	20.1405	20	5912.6
5649	4633	4099	5126	4419	5517	4960	5710	6389	6532	36	16.8	15.1201	16	5303.4
5303	4241	4419	4831	4910	5678	4791	5467	6256	6262	27	15	16.0837	16	5215.8
5782	4399	4776	5491	4896	5658	5025	5344	6473	6533	20	13.1	17.6905	18	5437.7
5930	5437	5673	6254	5485	6389	6234	6564	6637	6703	15	15.2	26.0847	26	6130.6
5699	4225	4607	5443	4443	5567	5060	5597	6353	6345	28	17.7	18.4997	18	5333.9
5727	4362	4570	5489	4540	5342	4988	5612	6344	6595	25	17.8	20.1025	20	5356.9
5043	4634	4668	4946	4490	5289	4624	4694	4620	4562	18	12.5	18.4816	18	4757
5560	5219	5682	5982	5327	5527	5990	5633	6146	6183	21	12.5	16.2448	16	5724.9
5834	4670	5017	5852	5141	6032	5635	5872	6165	5897	13	13.2	26.0405	26	5611.5
5622	4606	4848	5438	4956	5671	5470	5444	5995	6288	19	10.3	14.653	14	5433.8
5559	4655	4911	5364	5241	5998	5493	5905	6182	6102	20	14	18.8629	18	5541
5276	5584	5863	5830	5830	6259	5918	6197	6526	6581	20	14.2	19.1231	20	5986.4
5817	5407	5528	5460	5803	5865	5122	5838	6560	5902	17	11.3	17.6469	18	5730.2
6012	5268	5465	6120	5655	6246	6105	5889	6131	6460	25	16	18.0974	18	5935.1
5150	4798	4798	5026	4667	5502	5002	5159	5402	5554	21	15.5	20.0152	20	5105.8
5547	4574	4893	4656	4952	5217	4522	4854	5097	5166	18	16.9	24.6551	24	4947.8
5390	4177	4555	4779	4500	5322	5045	5712	6085	6231	29	17.6	17.9812	18	5179.6
5650	4952	5522	5385	5323	6131	5785	6722	5782	6405	11	4.3	11.0317	12	5765.7
4947	3922	4376	4865	4419	5100	4669	5087	5824	5852	14	12.7	23.4695	24	4906.1
4918	5636	5668	5849	5527	6230	5744	6040	6267	6542	13	7.9	16.2176	16	5842.1
5566	4199	4262	4922	4826	5808	5149	5463	6244	5941	37	18.8	16.7074	16	5238
5549	5042	4848	4970	5249	5806	5618	5511	5461	5746	30	11.7	11.7	12	5380
5466	5323	5141	5670	5482	6000	5762	5980	5726	5671	31	15.3	14.9896	14	5622.1
6128	5059	5512	5983	5501	6038	5533	6180	6435	6572	6	4.9	23.4599	24	5894.1
5404	3987	4341	4922	4321	5484	4779	5491	5964	6308	28	13.8	14.4422	14	5100.1
5699	5019	5014	5958	5431	5904	6018	5770	5899	6478	13	13.3	26.2224	26	5719
5678	3841	4605	5101	4692	5522	4876	5716	5612	6358	26	15.8	17.3831	18	5200.1
5926	5003	5396	6123	5461	6265	6075	5985	6392	6667	16	9	15.0286	16	5929.3
5574	4492	4504	5284	4933	5709	5236	5698	6357	6406	22	13.3	16.6253	16	5419.3
5340	4240	4775	5283	4328	5224	4782	5636	5605	6398	14	7.8	14.913	14	5161.1
5649	3982	4617	5052	4388	5412	4785	5474	6371	6263	20	16.5	22.1066	22	5199.3
5411	4720	4942	5404	5071	5863	5567	5773	6268	6562	12	8.9	19.5641	20	5558.1
5570	4467	4793	5266	4819	5353	5406	5340	6196	6516	18	16.3	23.818	24	5372.6
5272	4178	4638	4559	4522	5580	4545	5219	6202	6001	31	22.8	22.3586	22	5071.6
5538	4362	4627	4999	4865	5797	5408	5906	6474	6508	12	8.2	18.1528	18	5448.4
5678	4537	4543	5131	5006	5899	5316	5669	6357	6280	19	13	18.3264	18	5441.6
5393	4399	4518	4984	4339	5353	4741	5355	6485	6032	14	14.2	26.0379	26	5159.9
5323	4113	4790	5033	4254	5300	5160	4996	6004	6356	20	12.5	16.9074	16	5132.9
5129	5213	5381	5372	5389	5767	5066	5323	5690	5989	13	13.2	26.0405	26	5431.9
5246	4113	4241	4411	4579	5416	4947	5458	6189	6089	15	11.1	19.4275	20	5068.9
4201	4647	4770	4832	4467	5161	4807	4984	5191	4790	21	10.2	13.3361	14	4785
5295	4946	4854	5016	5157	5390	5263	4907	5608	5714	21	14.8	19.1376	20	5215
5456	4594	5019	5116	5179	5578	5199	5410	6085	6110	23	17.9	21.4763	22	5374.6
5070	5079	5230	4858	5078	4973	5209	5408	5274	5882	72	22.7	16.4601	16	5206.1
5313	5188	5524	5380	5378	5762	5671	5631	5835	6006	34	16.1	14.9416	14	5568.8
5647	5159	4907	5582	5730	5647	5958	5322	6191	6189	25	14.2	16.089	16	5633.2
5784	4991	5094	5623	5337	6209	5714	5991	6029	6593	27	20.3	21.7135	22	5736.5
5109	5285	4994	5326	5095	5655	5350	5571	5474	5717	27	10.2	10.9711	10	5357.6
5540	4126	4804	4838	4628	5475	4729	5530	6240	6146	18	17	24.7945	24	5205.6
5922	4551	4847	5693	5403	5459	5506	5336	6909	6763	19	13.9	19.5439	20	5638.9
5813	5187	5178	6034	5550	6157	6039	5931	6515	6765	28	15.3	16.0034	16	5916.9
5427	4221	4647	5049	4308	5233	4808	4584	6162	6251	25	17.8	20.1025	20	5069
5764	5092	5097	5992	5529	6171	5720	6067	6213	6521	37	20.3	18.0599	18	5816.6
5426	5036	5174	5141	4920	5650	5193	5538	5404	5552	11	6.8	16.6999	16	5303.4
5078	3959	4302	5075	4766	5787	4631	5658	5925	6238	24	13.3	15.5479	16	5141.9
5760	4802	4909	5481	4860	5887	5236	5583	5935	6216	18	12.3	18.1989	18	5466.9
5724	4615	5008	5655	4834	5914	5698	6031	6400	6533	68	30.3	22.4115	22	5641.2
5586	4673	4830	5152	4994	5698	5494	5637	5944	6010	33	15.4	14.5332	14	5401.8
4921	4780	4663	5210	5290	5726	5085	5364	5436	5565	19	15	21.0278	22	5204
5778	4567	4816	5051	4798	5515	5539	5657	6494	6544	15	9	15.9603	16	5475.9
6008	5607	5623	5867	5700	5945	6086	5916	6211	5924	29	16.5	16.8602	16	5888.7
4620	4738	4670	4826	4934	5279	5110	4772	4958	4674	18	15.4	22.5596	22	4858.1
5598	4119	4848	5326	4489	5700	5278	5506	6336	6592	22	14.8	18.45	18	5379.2
5362	4890	4800	5064	5187	5514	5301	5350	5974	5608	11	5.7	14.2358	14	5305
5619	5346	5420	5850	5762	5937	5994	5846	5833	6462	28	14.8	15.4831	16	5806.9
5334	4738	4670	4826	4934	5279	5110	4772	4958	4674	17	16.1	24.702	24	4929.5
5739	6149	5801	6058	6316	6490	6003	6709	6858	6887	18	12.9	19.0464	20	6301
5839	5291	5005	5505	5242	5712	5151	5154	5565	5565	40	17.1	14.6103	14	5402.9
5309	4437	4403	5165	4904	5668	5052	5303	6088	6246	22	10.8	13.572	14	5257.5
5936	4703	4964	5515	5036	6032	5871	5702	6347	6580	24	12.3	14.399	14	5668.6
4920	4958	4969	5547	4850	5453	5124	4962	5402	5903	10	3.6	10.4151	10	5208.8
4638	4862	4771	5087	5017	5067	4814	5081	5448	5558	24	11.3	13.2483	14	5034.3
5525	5174	5424	5450	5218	5534	5548	5652	5909	6115	31	16.7	16.3646	16	5554.9
5534	3626	3895	4440	3975	4869	4589	4515	5305	5621	23	14.1	17.0042	18	4636.9
6064	4744	5108	5611	5328	5905	5896	5840	6300	6463	33	15.7	14.8182	14	5725.9
5313	4060	4474	4723	4367	5618	4594	5733	5930	6057	26	15.9	17.4919	18	5086.9
5240	5000	5154	5484	5170	5711	5119	5518	5826	5972	21	14.1	18.2587	18	5419.4
6124	5496	5670	6127	5667	6535	6306	6444	6631	6591	28	18	18.8116	18	6159.1
5614	4465	5002	5093	4812	5852	5504	5843	6336	6516	33	19.3	18.2413	18	5503.7
5192	4353	4606	5074	4843	5753	5214	5699	5979	6198	32	16.6	15.9583	16	5291.1
5866	4691	4972	5582	5085	5722	5750	5844	6512	6344	27	21.2	22.6682	22	5636.8
5761	5013	5294	5558	5233	5776	5663	5734	6308	6377	24	15.5	18.0704	18	5671.7
5728	5314	5393	5886	5607	5965	5777	6145	5450	6212	12	9.3	20.3662	20	5747.7
5395	6444	6975	7414	7268	8343	7435	8350	8717	8792	29	13	13.2918	14	7513.3
6165	5382	5560	5755	5322	6086	5587	6037	6144	6340	23	11.1	13.4554	14	5837.8
5674	4853	4761	5415	5332	6226	5543	5972	6251	6536	19	16.8	23.447	24	5656.3
5605	4542	4443	5480	4964	6031	4937	5535	6223	6230	42	19	15.916	16	5399
5509	3994	4251	4751	4563	5298	5090	5153	5920	5998	24	17.6	20.4722	20	5052.7
5205	4810	4863	5068	4862	5077	5123	5601	5827	5810	44	18.9	15.5261	16	5224.6
5299	4618	4822	5178	5047	5004	5350	5140	5825	5586	27	14.2	15.2327	16	5186.9
5413	4783	4875	5402	4810	5643	5862	5745	6017	5887	23	20.7	24.7581	24	5443.7
5619	4306	4393	5052	4837	5652	4794	5566	6134	6198	21	16.9	21.7671	22	5255.1
5554	5192	5282	5605	5197	5710	5560	5662	6078	5681	41	20.4	17.2944	18	5552.1
5502	4259	4503	4990	4616	5562	4729	5672	6129	6316	21	12.5	16.2448	16	5227.8
5626	4351	4799	5183	4465	5676	5080	5657	6237	6505	23	16.7	20.0665	20	5357.9
5303	4148	4649	4945	4364	5184	4913	5285	6246	6462	21	13	16.8749	16	5149.9
5337	4851	5036	5444	4726	5739	5395	5388	6108	6038	26	11.5	12.6971	12	5406.2
5761	5148	5322	5764	5806	5758	5544	6006	5566	6446	17	14	21.6306	22	5712.1
4978	4081	4396	5047	4923	6025	4993	5843	6040	6238	34	12.8	11.8553	12	5256.4
5246	4772	5034	5426	4926	5425	5396	5309	6149	5918	22	11.8	14.7953	14	5360.1
5546	4540	5175	5410	5504	5633	5454	5494	5993	6197	18	15.1	22.1394	22	5494.6
5499	5176	4890	5528	5298	5678	5900	5570	6204	5649	21	14.6	18.8866	18	5539.2
4814	4273	4502	4934	4576	5322	4917	5053	4714	5370	14	12.2	22.6088	22	4847.5
5817	4349	4444	5124	4756	6014	5121	5537	6134	6474	32	17.8	17.1175	18	5377
4930	4815	4926	5009	4702	5466	5179	5696	5862	6072	28	13.4	14.0257	14	5265.7
5724	4511	4629	5250	4620	5577	5387	5276	6054	6395	10	3.2	9.37367	10	5342.3
5766	5646	5658	5758	5880	6141	5860	6054	6300	6357	21	13.3	17.2527	18	5942
5715	4773	5518	5578	5340	5719	5334	5712	6080	6263	12	9.5	20.7662	20	5603.2
5068	4404	4749	5014	4790	5086	4987	5258	5578	5748	29	19.5	19.9172	20	5068.2
5369	4123	4292	4816	4655	5320	4732	5281	5910	6163	52	21.2	16.4693	16	5066.1
5833	5093	5352	6144	5720	6352	6294	6142	6557	6558	31	17.7	17.3469	18	6004.5
5621	4194	4504	4828	4220	5367	4801	5820	6373	6155	16	12.2	20.0276	20	5188.3
4886	4543	4253	5097	4804	5797	4885	5270	6151	6207	48	12.1	9.50159	10	5189.3
5534	4624	4573	5396	5110	5747	5105	5664	6185	6066	18	12.2	18.0575	18	5400.4
5961	5019	5144	5932	5752	6061	5605	5950	6387	6072	18	16.2	23.6783	24	5788.3
5714	7740	8092	8899	8257	9158	8828	9030	9062	8531	34	23.5	21.8812	22	8331.1
6207	5562	5895	6240	5811	6429	6334	6260	6809	6362	14	14.3	26.2084	26	6190.9
5262	4139	4425	4965	4464	5540	4981	5536	6267	6115	27	11.2	12.0376	12	5169.4
6138	5200	5242	5686	5679	6184	6040	6155	6094	6738	42	21.9	18.4003	18	5915.6
5882	7605	8132	8838	8057	9084	8491	8669	8835	9247	6	4.7	22.6534	22	8284
5962	5781	5810	5902	5788	6264	5960	6236	6476	6704	19	16.8	23.447	24	6088.3
5194	4600	4859	5466	5414	5384	5440	5664	5774	6144	26	17.4	19.1229	20	5393.9
5886	4675	5003	5644	4923	5782	5780	5716	6125	6518	20	15	20.1626	20	5605.2
5585	4931	4994	5389	5474	5731	5482	5722	5982	5920	30	16.8	16.8	16	5521
5318	5945	5945	6238	5782	6413	6415	5674	6212	6442	23	12.9	15.5869	16	6038.4
5407	6201	6234	6194	6462	6736	6440	6796	7104	7007	19	13.6	19.1384	20	6458.1
6138	5200	5242	5686	5679	6184	6040	6155	6094	6738	42	19	15.916	16	5915.6
5048	5678	5610	6019	5641	6087	6188	5827	6459	5893	31	14.1	13.8112	14	5845
5000	4879	5093	5221	5180	5674	5201	5568	5696	5835	25	12.5	14.1888	14	5334.7
5202	4989	4875	5177	5107	5435	4602	5396	5742	5860	19	11.9	16.8338	16	5238.5
5134	4320	4533	4951	4612	4493	4861	5584	6214	6221	16	9	15.0286	16	5092.3
5150	5141	5359	5091	5286	5455	5526	5735	5346	5758	18	14.3	21.0172	22	5384.7
5118	5676	5517	5868	5622	6016	6122	5910	5987	6341	26	17.3	19.0142	20	5817.7
6285	5132	5277	5261	5819	5711	5708	6209	6179	6194	19	15.8	22.1043	22	5777.5
4677	4194	4216	4661	4638	5471	4633	5403	5818	5993	39	22	19.105	20	4970.4
5408	5246	5102	5414	5517	6110	5452	5838	5766	6217	23	12	14.522	14	5607
5850	4483	4614	5099	4847	5837	5162	5720	6174	5997	17	10	15.7124	16	5378.3
5690	4513	4806	5307	5029	5828	5438	5676	6215	6307	34	15.7	14.5672	14	5480.9
5624	4436	4937	5300	4707	5567	5335	5601	6307	6543	16	14.2	23.1133	24	5435.7
5583	4099	4145	4873	4585	5613	4741	5540	6243	6162	31	18.5	18.1328	18	5158.4
5590	4425	4416	5348	5264	5992	4932	5806	5963	6374	20	10.3	14.0244	14	5411
5252	4964	5067	5215	4920	5514	5400	5306	5185	5819	19	15.1	21.1625	22	5264.2
8175	4430	4666	5128	4668	5510	5185	5443	6130	6356	22	11.1	13.9393	14	5569.1
5286	4510	4919	4950	4762	5199	5342	5186	5779	5941	28	17.7	18.4997	18	5187.4
4934	4925	5100	5072	5479	5579	5159	5758	5523	6014	15	13.4	23.178	24	5354.3
5611	5468	5397	5690	5599	5662	5702	5896	6088	6098	15	14.7	25.2796	26	5721.1
5701	4865	4752	5348	5291	5854	4945	5958	5831	6320	22	18.3	22.6901	22	5486.5
5501	4913	5357	5740	5485	6073	6025	6052	6467	6592	29	18.4	18.7964	18	5820.5
5589	4548	4693	5272	4977	5744	5255	5729	6364	6611	12	8.3	18.355	18	5478.2
6161	5141	5359	5579	5306	6088	5958	5752	6331	6265	28	22.1	23.0717	24	5794
5456	4139	4580	5273	4446	5387	4957	5229	6299	6492	13	6.4	13.3546	14	5225.8
5662	4770	4973	5134	5066	5792	5282	5625	6121	6370	31	17.4	17.0522	18	5479.5
6145	5888	5919	5914	5905	6418	6002	6438	6553	6290	36	15.6	14.0272	14	6147.2
6062	5167	5530	6097	5520	6152	6122	6127	6450	6467	17	13	20.16	20	5969.4
5284	4456	4582	5296	4989	5811	4971	5405	6075	6206	38	20.9	18.3594	18	5307.5
5018	4014	4370	4702	4499	5269	4639	5327	5964	5887	22	14	17.4774	18	4968.9
5360	5454	5790	5714	5638	6174	5806	6047	6176	6502	36	17.9	16.1227	16	5866.1
5946	5693	5931	6068	5952	6493	6107	6288	6777	6693	6	4.6	22.2481	22	6194.8
5401	5314	5234	5322	5566	5801	5488	5840	5590	6127	27	19.6	20.9707	20	5568.3
5573	4351	4799	5183	4465	5676	5080	5657	6237	6505	23	16.1	19.3608	20	5352.6
5747	4344	4541	5094	5019	5999	4931	5771	5754	6316	20	11.9	16.123	16	5351.6
6259	6146	6177	6166	6301	6470	6380	6507	6910	6607	27	16	17.147	18	6392.3
6249	5271	5274	5923	5751	6318	6201	6384	6558	6148	40	21	18.0107	18	6007.7
5123	4792	4975	5188	4901	5482	4922	5452	5469	5631	26	18.6	20.4266	20	5193.5
5289	4092	4353	5062	4451	5570	5010	5184	5840	6130	33	19.5	18.4316	18	5098.1
6321	5426	5431	5506	5668	5634	5847	5240	6672	6145	12	5.5	12.6011	12	5789
5926	5790	5588	5888	5612	5819	5483	5957	6111	6230	16	10.7	17.6949	18	5840.4
5744	3793	4417	5035	4166	5225	5022	5282	5854	6259	33	18.7	17.6705	18	5079.7
5141	4518	5034	5190	5435	5702	5331	5382	5650	5646	19	12.1	17.1056	18	5302.9
4872	4685	4651	4810	4934	5510	5144	5288	5626	5541	26	9.7	10.73	10	5106.1
5520	4337	4477	5002	4661	5461	5034	5715	6200	6042	20	15.5	20.8113	20	5244.9
5783	5287	5390	5319	5723	5880	5587	5903	5966	6158	34	15.6	14.4736	14	5699.6
5668	4876	5124	5897	5549	6096	5938	6078	6461	6542	21	13.3	17.2527	18	5822.9
5982	5277	5332	5798	5402	5859	6005	5855	5952	6184	23	17.9	21.4763	22	5764.6
7387	5105	5236	4916	5310	5530	5486	5145	5155	6087	12	8	17.7477	18	5535.7
5517	4934	4672	5282	5460	5709	5355	5130	6113	5459	31	13.7	13.4185	14	5363.1
6106	5277	5361	5819	5506	5982	5954	5777	6551	5797	23	13.5	16.2959	16	5813
5685	4906	5054	5335	5405	5878	5402	5492	5928	6058	16	12.6	20.6469	20	5514.3
4618	5122	4825	4806	4886	5022	5077	5185	5400	5490	21	14.3	18.5099	18	5043.1
5176	5460	5625	5794	5461	6141	5637	5920	6181	5906	23	16	19.2431	20	5730.1
5390	5121	5765	5554	5454	5413	5143	5842	5886	5898	22	18.6	23.0525	24	5546.6
5614	4919	5239	5217	5051	5523	5342	5766	5722	6198	19	11.3	16.0174	16	5459.1
5670	4423	4666	5308	5233	6161	5226	5887	6203	6340	26	15.5	17.0567	18	5511.7
5793	4423	4666	5308	5233	6161	5226	5887	6203	6340	26	16	17.6007	18	5524
5725	5049	5769	6023	5828	6519	6213	6452	6587	6299	14	13.2	24.3279	24	6046.4
5323	4064	4813	5100	4177	5398	5058	5449	5700	6397	22	13.1	16.3816	16	5147.9
5056	3994	4690	4283	4289	5477	4889	5303	5660	5951	12	8	17.7477	18	4959.2
5553	4603	4822	5264	4924	5693	5237	5657	6140	6634	13	10.1	20.3427	20	5452.7
5217	4438	4828	5273	5111	5761	5053	5678	6366	6114	20	12.4	16.7768	16	5383.9
5999	5804	6037	5800	5724	6394	6018	6042	6852	6538	13	11.6	23.1145	24	6120.8
5843	5148	5162	5272	5443	6016	5727	5904	6443	6787	28	14	14.6504	14	5774.5
5602	4433	4723	4931	4765	5675	4999	5396	5964	6527	19	11.1	15.7449	16	5301.5
5749	5065	5063	4928	5148	5145	5750	5650	6145	5867	16	10.7	17.6949	18	5451
5475	4279	4897	4746	4791	5627	5059	5315	6563	6063	14	8.9	16.8602	16	5281.5
5166	4443	4761	5271	4950	5748	5017	6062	6239	5964	31	10.6	10.3759	10	5362.1
5448	4992	5584	5657	5431	5593	5410	4765	5218	5902	21	11.4	14.8559	14	5400
5181	4276	4470	4900	4790	5671	4797	5635	6047	6391	15	11.8	20.5737	20	5215.8
5502	4458	4472	5206	4833	5912	4811	5656	6164	6002	18	13.5	19.8921	20	5301.6
6067	5099	5552	5726	5604	6060	6115	6177	6532	6562	14	10.4	19.4889	20	5949.4
5241	4969	5226	5210	5486	5663	5165	5363	5317	5782	10	4.4	12.4627	12	5342.2
4560	4346	4860	4694	4818	5076	4865	4966	5143	5482	11	3.6	9.39358	10	4881
5788	4555	4468	5253	5056	6008	5118	5345	6010	6250	15	11	19.2634	20	5385.1
5353	4323	4268	4965	4335	5483	4872	5498	6003	5486	21	13.2	17.1268	18	5058.6
6144	5377	5466	5991	5621	5887	6293	6106	6194	6162	23	10.7	12.9808	12	5924.1
5199	5533	5330	5460	5229	5986	5308	5759	6214	5946	31	19.2	18.8206	18	5596.4
5675	4435	4809	5295	4663	5591	5556	5439	6427	6439	18	13.6	20.0329	20	5432.9
5625	5185	5360	5431	5496	5897	5823	5942	6323	6155	14	11.9	22.0912	22	5723.7
5532	5077	5239	5619	5231	5834	5206	5413	6000	6193	28	17.4	18.1877	18	5534.4
4849	4864	5136	4877	4256	5596	4802	5333	6172	5222	10	3.8	10.9311	10	5110.7
6169	4936	5575	5794	5801	5981	5683	5973	6237	6414	21	15.3	19.7646	20	5856.3
5426	4938	4862	5431	5093	5674	5324	5587	5715	6488	19	13.5	19.0032	20	5453.8
5018	5082	4966	5053	5151	5583	4950	5358	4887	5557	10	4.3	12.2091	12	5160.5
5579	5005	5529	5787	5270	6210	6103	6141	6138	6512	14	13.2	24.3279	24	5827.4
5545	4410	4541	4796	4655	5480	4470	5624	6278	6264	32	20.9	20.1135	20	5206.3
5856	5012	4993	5977	5809	6275	6047	6231	6327	6252	18	17.5	25.491	26	5877.9
5298	5110	4921	5335	5384	5950	5446	5755	6283	6495	15	7.9	14.1244	14	5597.7
5263	5426	5707	5926	4996	5947	5980	5706	6296	6130	29	15.8	16.1466	16	5737.7
5506	4926	4793	5372	5006	5758	5169	5484	5855	5549	28	15	15.6912	16	5341.8
4886	5016	4943	5362	4958	5516	5188	5333	5414	5202	16	12.4	20.3374	20	5181.8
5177	4906	5273	5105	5262	5541	5318	5735	6404	6208	12	8.3	18.355	18	5492.9
5325	5312	5370	5392	4914	5468	5447	5359	5698	5531	20	12.4	16.7768	16	5381.6
5553	4156	4644	4705	4567	5492	4726	5513	6229	6170	21	13.5	17.5043	18	5175.5
5684	4328	4879	5280	4502	5694	5367	5626	6458	6350	27	13.5	14.4877	14	5416.8
4954	4599	4603	4603	4902	4966	5354	5117	5222	5465	12	4	9.41893	10	4978.5
5370	4335	4461	5081	4735	5392	5009	5650	6159	6285	20	12.4	16.7768	16	5247.7
5058	4560	4392	5382	4980	5948	4897	5806	6079	6175	11	5	12.6445	12	5327.7
4946	4404	4749	5014	4790	5086	4987	5258	5578	5748	29	19.7	20.121	20	5056
6166	5301	5541	5782	5536	6183	6390	6292	6629	6553	51	16.5	12.7994	12	6037.3
6183	5672	6055	5815	5982	6317	6070	6389	6297	6554	32	20.3	19.5335	20	6133.4
5555	4285	4584	5480	4473	5635	5302	5927	6332	6590	17	12.4	19.275	20	5416.3
4911	4810	4846	5113	4506	5276	5170	5136	5200	5013	28	14.6	15.2749	16	4998.1
5555	4328	4634	5096	4821	5609	5040	5862	6240	6437	22	8.8	11.1166	12	5362.2
5586	5534	5380	5333	5774	5859	5851	5400	6422	5966	29	14.1	14.4135	14	5710.5
5825	4968	5190	5917	5682	6100	5807	6211	5910	6488	18	14.3	21.0172	22	5809.8
5629	4282	4496	4954	4469	5515	5092	5831	6022	6273	18	11.1	16.4983	16	5256.3
8687	5326	5559	5883	5654	5706	6302	5803	6310	6214	18	18	26.1866	26	6144.4
4925	4538	4697	5327	5385	5384	4978	5537	5678	4770	19	14.7	20.6235	20	5121.9
5071	5358	5205	5362	5262	5804	5620	5680	5874	5755	20	14.7	19.773	20	5499.1
5698	4926	4898	5206	4870	5086	5466	5335	5268	5870	15	10.6	18.606	18	5262.3
5839	5291	5005	5505	5242	5712	5151	5154	5565	5565	40	20.8	17.8361	18	5402.9
6105	4101	4553	5329	4661	5528	5385	5176	5948	6056	27	20.3	21.7135	22	5284.2
5520	5098	5128	5709	5105	5957	6033	5782	6235	6118	38	20.5	18.0026	18	5668.5
5462	5202	5507	5582	5529	5673	5575	5441	5614	6202	20	14.2	19.1231	20	5578.7
5346	5043	5157	6141	5621	6171	5963	5619	6594	6758	6	3.6	18.1104	18	5841.3
6042	7539	7363	8008	7961	8954	8289	8718	9218	8761	21	10.4	13.5898	14	8085.3
6060	5006	5439	5851	5507	6213	6024	6054	6667	6217	31	17.9	17.5434	18	5903.8
6171	5396	5730	6111	5516	6212	5971	6403	6666	6420	18	15.4	22.5596	22	6059.6
5387	4493	4451	5112	5010	6064	5006	5574	6087	6343	16	13.3	21.728	22	5352.7
5520	4358	4616	4996	5141	5532	5050	6023	5925	5982	31	16.5	16.1681	16	5314.3
5307	5284	5342	5311	5520	5721	5627	5412	5930	6213	19	14.3	20.084	20	5566.7
5746	5344	5537	6019	5754	6131	6241	5739	6222	5925	32	20.2	19.4368	20	5865.8
5631	5116	4946	5896	5406	6078	5348	6323	6415	6222	15	10.6	18.606	18	5738.1
5937	5597	5830	5759	5762	6135	5771	6059	6628	6457	23	11.6	14.0482	14	5993.5
5658	4239	3987	5006	4826	5558	4824	5729	6053	5985	19	13	18.3264	18	5186.5
5295	5460	5442	5683	5537	5687	5645	5924	5989	6416	13	10.5	21.0848	22	5707.8
5610	4626	4849	5150	5313	5519	5534	5676	5679	6234	17	14.6	22.5103	22	5419
6002	5029	4797	5144	5636	5648	5436	5679	5984	5893	16	10.2	16.9133	16	5524.8
5816	4386	4740	5076	4754	5753	5209	5707	6085	6420	21	15.1	19.5139	20	5394.6
6511	6531	6399	6425	6497	6636	6656	6760	7113	7233	14	13.5	24.8418	24	6676.1
5290	4892	5170	5586	5642	5940	6117	5949	6241	6330	20	11.9	16.123	16	5715.7
5265	4551	4847	5693	5403	5459	5506	5336	6909	6763	32	16	15.3789	16	5573.2
5304	4416	4554	5350	4451	5563	5533	5299	6288	6295	17	15.9	24.4104	24	5305.3
5512	4600	4818	4872	4856	5578	5106	5425	6070	6108	20	12.1	16.3846	16	5294.5
5630	5295	5538	6250	5777	6204	6321	6330	6651	6607	31	16.1	15.7753	16	6060.3
6241	5387	5934	6344	6000	6440	6114	6238	6687	6838	24	19.8	22.9829	22	6222.3
5971	5152	5406	6026	5476	6334	6117	6028	6511	6600	38	18.6	16.3093	16	5962.1
4670	3974	4664	4444	4299	5580	4400	5356	5809	6069	19	15.2	21.2971	22	4926.5
5775	4801	5439	6149	5334	6079	6217	6165	6464	6523	28	20.1	20.9942	20	5894.6
5766	4278	4915	5658	5279	5935	5743	5969	5656	6553	27	14.4	15.4455	16	5575.2
5819	4750	5367	5364	5774	5526	4898	5834	6240	5863	21	16	20.6414	20	5543.5
5637	4115	4383	4921	4780	5363	5151	5819	6204	6099	20	11.8	15.9921	16	5247.2
5892	4525	4901	5616	4752	5636	5695	5536	5973	6418	66	27.1	20.0614	20	5494.4
5432	4506	4831	5761	5548	5779	5827	5830	5920	6378	15	6.8	12.2724	12	5581.2
5392	4581	4507	5136	4814	5815	5133	5885	6219	6015	22	15.4	19.1785	20	5349.7
6126	7992	7918	8834	8239	9102	8984	8731	8738	8900	11	6.6	16.2549	16	8356.4
4952	5323	4954	5246	5502	5682	5353	5528	5457	6108	30	14.6	14.6	14	5410.5
5828	4914	4738	5496	5840	5726	5575	6127	6235	6693	19	12.9	18.1909	18	5717.2
5053	4150	4443	4561	4510	5495	4814	5372	5856	6129	25	9.5	10.8261	10	5038.3
6046	5830	5914	5833	6155	6390	6317	6782	6614	6781	33	18	17.0047	18	6266.2
6135	5585	5585	5951	6019	5828	6338	5945	6182	6148	28	17.1	17.8758	18	5971.6
5538	4958	4837	5333	5181	5717	5287	5077	5142	5473	28	22	22.9679	22	5254.3
8279	6796	7099	7696	6909	8239	7717	7404	8815	8976	21	13.4	17.3785	18	7793
4895	4822	4866	4701	5313	6015	5102	5262	5862	5609	28	14.1	14.7545	14	5244.7
6091	5326	5559	5883	5654	5706	6302	5803	6310	6214	20	16.3	21.8477	22	5884.8
5535	4571	4616	5290	5032	5969	5128	5891	6121	6486	31	14.9	14.5968	14	5463.9
5735	5674	5865	5950	5862	5870	6217	6420	6650	6556	19	13.3	18.7326	18	6079.9
5853	5284	5630	5890	5613	6165	6250	6113	6652	6626	23	17.4	20.8891	20	6007.6
5975	5818	6050	5954	6079	6243	5911	6695	7000	7078	19	17.1	23.8491	24	6280.3
5989	5021	5695	6017	5709	6330	6233	6016	6641	6937	30	18.6	18.6	18	6058.8
5231	5161	5113	5280	5285	5764	5430	5675	5940	6481	18	16.3	23.818	24	5536
5518	6067	6966	7980	6604	7821	7539	7531	8743	8793	44	20.4	16.7883	16	7356.2
4738	5158	5006	5253	4823	5374	5476	5079	5123	5412	6	5	23.8611	24	5144.2
6012	5060	5664	5872	5220	6250	5714	6038	6382	6623	12	7.5	16.731	16	5883.5
4776	4114	4420	4635	4625	5566	4684	5342	5685	6081	24	15.5	18.0704	18	4992.8
5998	5564	5599	5816	5638	5838	5617	5958	5827	6338	13	12.7	25.1292	26	5819.3
4906	4049	3994	4828	4651	5037	4604	5458	5331	5994	11	6.1	15.1367	16	4885.2
5094	3731	4154	4714	4480	5229	4623	4859	5543	6145	26	15.2	16.7302	16	4857.2
5269	4936	5110	5156	5077	5461	4849	5060	5537	5765	23	15.8	19.0077	20	5222
6031	5370	5395	6238	5793	6294	6377	6291	6120	6036	29	15.1	15.4331	16	5994.5
5075	5190	5398	5312	5435	5949	5537	5587	5660	6089	10	3.8	10.9311	10	5523.2
5330	4839	4846	5336	5546	5882	5241	5203	5592	5690	28	16.8	17.5638	18	5350.5
5097	5221	5325	5518	5693	5731	5626	5786	5424	5962	28	16.4	17.1478	18	5538.3
6064	4744	5108	5611	5328	5905	5896	5840	6300	6463	22	16.2	20.1488	20	5725.9
4979	4010	4104	4645	4208	4617	4782	4734	5602	5761	14	5.5	10.775	10	4744.2
5789	3884	4464	4920	4832	5443	4796	5721	6169	5963	12	9.6	20.9659	20	5198.1
5501	5334	5645	5888	5442	6016	6133	5799	5904	5946	21	16.2	20.8917	20	5760.8
6304	5383	5677	6003	5993	6550	6199	6343	6729	7133	22	14.8	18.45	18	6231.4
5010	4900	5049	5860	5329	6147	5615	6253	6582	6709	30	15.2	15.2	16	5745.4
8104	4538	4560	5290	4528	5576	5286	5798	6471	6614	23	19.2	23.0013	24	5676.5
6175	4851	5350	5653	5286	5861	5139	6044	5754	5923	43	17.6	14.5721	14	5603.6
6071	5519	5734	6216	5774	6494	6355	6325	6640	6922	40	16.9	14.4362	14	6205
5985	5105	5416	5940	5733	6305	6214	5759	6357	6549	15	9.1	16.1264	16	5936.3
5794	4726	4900	5694	5222	5358	5471	5515	5494	5790	28	23.6	24.6292	24	5396.4
5568	4795	4998	5338	5111	5656	5217	5503	6019	5899	18	14.6	21.4383	22	5410.4
6165	5292	5491	5873	5421	6220	6305	6164	6669	6675	28	18.1	18.9155	18	6027.5
5529	5126	5299	5624	5290	5770	5386	5780	6097	6047	20	17.3	23.1409	24	5594.8
5748	4665	4834	5329	5163	5672	5387	5499	6219	6199	13	13.1	25.8585	26	5471.5
4922	5282	5226	5938	5359	5984	6127	5452	5650	5843	14	13.1	24.1564	24	5578.3
5645	4299	4808	5035	4692	5670	4913	5854	6271	6442	47	17.7	14.1516	14	5362.9
5523	4974	4716	5052	5266	5262	5466	5286	5710	5849	26	13.4	14.7697	14	5310.4
5446	4403	4692	5002	4625	5564	5296	5311	6085	6093	21	12.8	16.623	16	5251.7
5557	5516	5582	5643	5648	5774	5882	6125	6071	6303	20	14.6	19.6431	20	5810.1
5573	4537	4543	5131	5006	5899	5316	5669	6357	6280	25	14.8	16.7589	16	5431.1
5670	5032	5309	5255	4998	5510	5338	5838	5508	5762	26	17.3	19.0142	20	5422
6276	6080	6128	6385	6004	6506	6368	6565	7052	7092	18	12.8	18.9052	18	6445.6
5752	4649	4867	5628	4971	5678	5599	5749	6428	6092	15	10.6	18.606	18	5541.3
5297	5011	5223	5538	5001	5802	5298	5724	6100	5870	21	13.1	17.0009	18	5486.4
5948	4833	5226	5792	4945	5937	5880	5789	6100	6941	12	7.8	17.3417	18	5739.1
5747	4604	4545	5312	4970	5956	5041	5757	5941	6408	22	10.7	13.4496	14	5428.1
5763	5308	5386	5334	5809	6083	5986	5857	6062	6090	20	11.9	16.123	16	5767.8
5362	4115	4601	4964	4725	5474	4758	5534	5933	6277	12	5.8	13.2279	14	5174.3
5577	4826	5116	5346	4968	5323	4977	5284	5554	5694	22	13.8	17.2341	18	5266.5
5689	5315	5140	5758	5622	6102	5993	5851	6303	5774	29	22.5	22.9731	22	5754.7
5751	5365	5527	5931	5772	6358	6078	6109	6359	5503	19	13.7	19.2736	20	5875.3
5725	4279	5075	5303	4607	5751	5279	5417	5998	6611	47	15.9	12.6765	12	5404.5
5874	4848	4813	5533	5439	6166	5641	6104	6008	6434	19	15	21.0278	22	5686
6043	5006	5343	5853	5550	6187	5866	6107	6217	6652	18	9.6	14.361	14	5882.4
5587	5192	5282	5605	5197	5710	5560	5662	6078	5681	18	12.9	19.0464	20	5555.4
5150	4142	4314	4741	4930	5724	4797	5700	5781	6183	18	14.3	21.0172	22	5146.2
5193	4558	4464	5337	5226	5980	5298	5875	5986	6468	23	13	15.7051	16	5438.5
5573	4542	4938	5321	4533	5854	5732	5643	6606	6294	21	13.7	17.7559	18	5503.6
5318	4848	4796	5424	5334	5890	5362	5920	6169	6387	20	15.6	20.941	20	5544.8
5518	4906	5361	5118	5078	5864	5306	5594	5953	5850	20	11.8	15.9921	16	5454.8
6056	5045	5251	5677	5148	5537	5792	5886	6244	6219	15	14.5	24.9571	24	5685.5
5741	5542	5758	5819	5212	5855	5942	5885	6327	6140	26	20.1	22.0548	22	5822.1
6019	5871	6026	6103	5730	6501	6197	5859	6578	6586	21	9.9	12.9554	12	6147
5218	4932	4960	4938	5147	5505	5371	5534	5688	5814	17	13	20.16	20	5310.7
5138	4774	5114	5338	5017	5287	5208	5084	5231	5682	20	12.1	16.3846	16	5187.3
5398	3980	4728	4919	4548	5540	4620	5549	5984	6045	19	16	22.3731	22	5131.1
5261	4229	4614	4549	4488	5431	4667	5422	5942	6198	47	19.5	15.6307	16	5080.1
5429	4327	4636	4933	4911	5867	5094	6234	6092	6120	13	8.7	17.7268	18	5364.3
5583	5215	5258	5750	5861	5989	5586	5939	6099	6152	18	16.2	23.6783	24	5743.2
5421	4779	5008	4998	5004	5410	5518	5292	5934	5799	25	19.1	21.5489	22	5316.3
5502	4060	4633	4813	4657	5395	4786	5345	6133	6257	22	15.4	19.1785	20	5158.1
5559	5050	4975	5181	5140	5534	5356	5845	6414	6198	25	11.7	13.2934	14	5525.2
5704	4722	4873	5435	5001	5952	5572	5765	6281	6519	19	15.8	22.1043	22	5582.4
5942	4970	5351	6121	5537	6325	5982	6100	6040	6454	30	17.2	17.2	18	5882.2
5118	5662	5526	5962	5778	5841	6124	5711	5994	6054	31	19.4	19.0171	20	5777
5817	4791	5122	5665	4860	5912	5673	5611	6493	6621	18	14.8	21.7189	22	5656.5
5378	4677	5003	5838	5553	5973	5757	6029	6384	6711	19	12	16.9697	16	5730.3
5323	4113	4790	5033	4254	5300	5160	4996	6004	6356	18	11.1	16.4983	16	5132.9
5641	4987	5152	5412	5419	5643	5485	5645	5522	6194	12	4.7	10.9148	10	5510
5538	4109	4612	5051	4514	5467	4986	5491	6143	6214	15	9	15.9603	16	5212.5
5337	4212	4438	4592	4555	5689	4600	5421	6330	6151	37	16.6	14.7265	14	5132.5
6070	7685	7678	8432	7900	8816	8558	8544	9061	9330	21	14.9	19.263	20	8207.4
5331	4109	4319	5019	4383	5362	4855	5296	6121	5883	13	11.4	22.7466	22	5067.8
5527	4960	4966	5346	5190	5633	5518	5197	5758	5935	28	17.3	18.0837	18	5403
5075	4973	5034	5430	5401	5732	5207	5662	6137	6006	27	14.8	15.871	16	5465.7
5930	6069	6132	5910	5844	6410	6314	6033	6244	6191	19	15	21.0278	22	6107.7
5164	4527	4754	4984	4792	5141	5097	5400	5862	5719	29	12.3	12.5778	12	5144
5550	4237	4979	5543	4652	5361	5000	5451	5862	5628	20	10.3	14.0244	14	5226.3
5756	4758	5114	5778	5300	6011	5849	5910	6120	6678	7	2	9.27813	10	5727.4
5109	4257	4737	4868	4331	5479	4919	5735	6025	5956	21	18.5	23.7639	24	5141.6
5553	4289	4287	5043	4421	5392	4751	5631	6088	6332	44	16.7	13.6792	14	5178.7
5256	5340	5258	5754	6069	5890	5684	6280	5875	6228	12	7.5	16.731	16	5763.4
4852	4767	4573	4727	4836	5195	4757	4864	5133	5492	29	15.2	15.535	16	4919.6
5879	4864	5485	5942	5434	6130	6199	5821	6411	6607	31	18.1	17.7399	18	5877.2
5388	4352	4410	5078	4672	5593	5197	5811	5992	6492	16	13.9	22.6521	22	5298.5
5261	4229	4614	4549	4488	5431	4667	5422	5942	6198	25	13	14.7481	14	5080.1
5218	4580	5009	5175	5322	5306	4917	5313	5822	5973	17	14.1	21.7773	22	5263.5
5359	3975	4170	4638	4748	5560	4766	5238	5981	5655	21	13.3	17.2527	18	5009
5267	4467	4603	5422	4917	5551	5249	5086	6153	6390	28	13	13.6092	14	5310.5
5494	4862	5014	5093	5049	5557	5077	5347	6226	6125	13	11.5	22.9306	22	5384.4
5491	4421	4620	5066	4528	5462	5175	5384	6063	6526	19	14	19.679	20	5273.6
5287	5018	5430	5729	5431	5720	5610	5800	5638	5654	27	15.5	16.6154	16	5531.7
5330	5067	4862	5170	5387	5633	5159	5398	5585	5759	18	14.1	20.7362	20	5335
6349	6050	6027	5997	6292	6437	6287	6676	6712	6699	14	9.7	18.2657	18	6352.6
5563	4496	4869	5228	5208	5896	5196	5845	6111	6585	20	12.7	17.1686	18	5499.7
5143	4765	4915	5358	4778	5554	5341	5447	5682	5939	23	8.5	10.3631	10	5292.2
5050	5242	5332	5380	5417	5652	5347	5991	6012	6211	20	15.7	21.0706	22	5563.4
5906	4731	5348	6053	5264	5951	5984	5697	6218	6674	26	15.5	17.0567	18	5782.6
5634	5169	5243	6176	5684	6127	6326	6312	6472	6602	34	19.9	18.5023	18	5974.5
5553	4187	4017	4753	5080	5300	5014	5951	5548	6374	20	9.7	13.2346	14	5177.7
5521	4737	4822	4511	4692	5399	4942	5134	5159	5335	12	5.8	13.2279	14	5025.2
5308	5602	5512	5932	5513	5958	6078	5958	6113	6166	28	16.8	17.5638	18	5814
4945	4884	5076	5036	4967	5482	5019	5470	5462	5524	41	20.3	17.2079	18	5186.5
5659	4323	4501	5216	4714	5952	5482	5632	6107	6368	17	12.7	19.7178	20	5395.4
5575	4259	4311	5329	5014	5758	5065	5624	5880	6227	24	18.7	21.7282	22	5304.2
5566	4093	4544	4965	4649	5687	4891	5555	6214	6371	38	18.5	16.2202	16	5253.5
5340	4204	4369	5175	4253	5375	5167	5377	5751	6155	31	17.3	16.9539	16	5116.6
5514	5602	5512	5932	5513	5958	6078	5958	6113	6166	28	11.3	11.8382	12	5834.6
5649	4245	4734	5230	4535	5409	4931	5388	6353	6398	13	8.2	16.7849	16	5287.2
5525	4471	4574	5365	5029	6043	5047	5820	6016	6027	24	14.5	16.9246	16	5391.7
5573	4349	4444	5124	4756	6014	5121	5537	6134	6474	33	15.7	14.8182	14	5352.6
5606	4275	4648	5433	4663	5671	5146	5708	6212	6668	20	11.7	15.8612	16	5403
5552	4310	4552	4997	5078	6005	5116	5792	6161	6102	26	15.2	16.7302	16	5366.5
5328	3983	4568	4773	4211	5412	4696	5594	5985	6281	20	16.8	22.4946	22	5083.1
5476	4112	4751	5267	4513	5613	5396	5336	6229	6590	21	19.3	24.7603	24	5328.3
5553	4707	5048	5214	4803	6013	5600	5845	6330	6368	22	14.7	18.3285	18	5548.1
5357	4082	4471	4956	4414	5538	4762	5680	6310	6037	13	7.9	16.2176	16	5160.7
5274	4970	5392	5426	5609	5450	5544	6069	5878	5986	20	14.3	19.2532	20	5559.8
5650	5317	5715	5878	5398	5612	6070	5882	5815	5969	30	12.5	12.5	12	5730.6
5394	4438	4801	4876	4946	5202	5119	5694	5798	5358	31	16.8	16.4628	16	5162.6
5619	5606	5711	5800	5739	6117	6139	6077	6502	6459	21	7.7	10.1519	10	5976.9
5818	4516	4913	5633	5201	6016	5549	5601	6267	6191	36	23.8	21.5125	22	5570.5
8669	7364	7759	8240	7904	9052	8435	8618	8495	9216	15	13.4	23.178	24	8375.2
5899	4929	5089	5970	5414	6232	6129	5735	6190	6230	20	12	16.2538	16	5781.7
5580	4918	5102	5230	5350	5766	5411	5258	5918	6198	19	11.3	16.0174	16	5473.1
5708	5406	5078	5476	5478	6058	5649	5692	5830	6186	32	27.3	26.3051	26	5656.1
5353	4091	4468	4942	4435	5550	4705	5357	6181	6165	26	17.6	19.3402	20	5124.7
5604	4485	4387	5118	4523	5437	5166	5531	6242	6014	13	6.4	13.3546	14	5250.7
5397	4404	4503	4819	4794	5887	5143	5797	6073	6196	31	12.1	11.8479	12	5301.3
7916	4152	4429	5037	4185	5125	4702	5212	6046	6374	20	11.5	15.5993	16	5317.8
5386	4367	4740	4998	4687	5556	5100	5471	6056	6435	24	15.1	17.6122	18	5279.6
5605	4472	4719	5129	4633	5893	4836	5797	6052	6314	31	15	14.695	14	5345
5595	4677	4644	5217	5143	5959	5323	5185	6150	6533	33	15	14.1532	14	5442.6
5922	4177	4590	5078	4514	5526	5068	5648	6384	6400	41	16.3	13.7572	14	5330.7
6493	6164	6257	6257	6171	6463	6428	6568	7037	7063	16	11.6	19.0966	20	6490.1
5516	4451	4146	4805	4705	5432	4882	5593	6104	6326	19	14	19.679	20	5196
5584	4410	4836	5292	4599	5736	5359	5366	6332	6511	15	10.6	18.606	18	5402.5
5298	4509	4696	4969	4989	5721	5330	5825	6428	6579	16	14.8	24.0341	24	5434.4
5172	5177	5164	5178	5238	5749	5235	5718	5715	5122	21	11.6	15.1087	16	5346.8
5565	5376	5286	5261	5635	5791	5615	5698	5903	5896	20	12.8	17.2991	18	5602.6
5953	4993	5225	5772	5167	6089	5679	5527	6493	6293	20	12.4	16.7768	16	5719.1
5734	4154	4373	5026	4535	5455	4879	5514	6072	6200	20	16.9	22.6239	22	5194.2
5642	5122	5180	5412	5124	5601	5606	5147	5858	5941	23	16	19.2431	20	5463.3
5522	5463	5754	5686	5700	6027	5901	6067	6034	6359	28	14.5	15.1709	16	5851.3
5663	5978	5890	6222	5992	6282	6060	6150	6491	6926	32	19.3	18.5669	18	6165.4
6000	5326	5411	5928	5442	6342	6009	6125	5918	6603	24	14.3	16.6953	16	5910.4
5779	5216	5476	5740	5700	6298	5862	6295	6290	6602	28	15.4	16.1074	16	5925.8
5457	5077	5239	5619	5231	5834	5206	5413	6000	6193	21	9.6	12.5743	12	5526.9
5589	4261	4261	5305	4783	5785	4977	5687	6083	6275	19	16.9	23.5811	24	5300.6
5400	5142	5105	5188	5291	5558	5483	5387	6084	5913	31	13.6	13.3203	14	5455.1
5427	5133	5578	5403	5567	6069	5464	5870	6350	6221	19	16.1	22.5074	22	5708.2
5457	4287	4703	4992	4734	5434	4735	5375	6001	6153	19	14.1	19.814	20	5187.1
5121	5035	5376	5238	5806	5954	5566	5911	5928	6116	19	11.5	16.2897	16	5605.1
5511	4337	4675	5317	4405	5628	4801	5549	6286	6319	23	14.7	17.7119	18	5282.8
5329	4215	4348	4857	5009	5715	4892	5558	6056	6086	27	15	16.0837	16	5206.5
4852	4177	4555	4779	4500	5322	5045	5712	6085	6231	29	18.1	18.4908	18	5125.8
5659	4110	4591	4756	4502	5205	4882	5247	5757	6304	24	17.6	20.4722	20	5101.3
5551	4321	4630	5178	4632	5564	5130	5293	6180	6310	15	10.3	18.112	18	5278.9
5371	5048	5352	4882	5593	5550	5382	5621	5976	5874	17	13.1	20.3073	20	5464.9
5858	5457	5634	5870	5466	5980	6077	5817	6171	5802	21	11.7	15.2351	16	5813.2
5304	4978	5132	4912	4928	5590	4860	5842	5661	5726	20	13.6	18.3422	18	5293.3
5607	5138	5075	5458	5718	5910	5550	6073	6317	6162	17	10.6	16.6067	16	5700.8
5735	5215	5360	5463	5206	5624	5460	5561	5641	5782	43	23.8	19.8384	20	5504.7
5969	5086	5453	5747	5058	5544	5958	5690	6454	6058	20	13.1	17.6905	18	5701.7
5673	4624	4985	5095	5144	5258	4959	5671	6260	5987	18	11.3	16.7823	16	5365.6
7704	5422	5626	6046	5695	5903	6372	5755	6269	6102	18	14.4	21.1576	22	6089.4
7864	4129	4677	5340	4270	5412	5105	5709	5929	6374	39	14.2	12.2395	12	5480.9
5560	4144	4857	5656	4654	5572	5247	5555	6186	6622	26	17	18.6881	18	5405.3
5810	5411	5566	5670	5274	6078	5680	5920	6274	6374	22	12.1	15.1617	16	5805.7
5508	5366	5294	5318	5888	5698	5440	5923	6362	6341	19	8.8	12.5963	12	5713.8
5124	6396	6544	7266	6944	8319	7344	7847	8886	9020	28	15.4	16.1074	16	7369
5658	4305	5003	5302	4603	5610	5204	5606	5725	6586	24	17.1	19.9008	20	5360.2
5359	4206	4620	4999	4625	5453	5028	5374	6046	6349	12	8.6	18.9604	18	5205.9
5658	4523	4714	5399	4449	5706	5176	5466	6188	6323	18	12.9	19.0464	20	5360.2
5424	4204	4369	5175	4253	5375	5167	5377	5751	6155	27	16.2	17.3596	18	5125
5903	5571	5822	5722	5458	6107	6027	6134	6344	6310	20	13.7	18.4724	18	5939.8
6107	5031	5413	6035	5479	6173	6039	6145	6566	6508	28	19.5	20.3707	20	5949.6
6086	5942	5832	5987	5579	6164	6499	5736	6067	6071	20	10.1	13.7613	14	5996.3
6088	5355	5707	5802	5401	6215	6075	5825	6149	6359	21	16.9	21.7671	22	5897.6
5418	4180	4529	5308	4732	5414	5171	5073	5820	6145	14	10.4	19.4889	20	5179
5683	4273	4408	4675	4448	5408	5009	5499	5715	6366	31	17.3	16.9539	16	5148.4
4930	4815	4926	5009	4702	5466	5179	5696	5862	6072	16	11.6	19.0966	20	5265.7
5908	5291	5783	5681	5629	6095	5510	6102	6194	6210	18	10.9	16.2141	16	5840.3
5836	5404	5267	5546	5604	6114	5738	5909	5993	6405	27	14.4	15.4455	16	5781.6
5858	4404	4618	5611	5051	5138	5660	6164	6254	5680	19	13.7	19.2736	20	5443.8
5642	5122	5180	5412	5124	5601	5606	5147	5858	5941	24	15.6	18.1849	18	5463.3
5858	5068	5136	5855	5544	6208	5776	5963	6173	6370	19	14.2	19.949	20	5795.1
5747	4610	4823	4971	4949	5755	5099	5543	6415	6217	13	7.5	15.4586	16	5412.9
5810	4893	4959	5474	5243	6149	5490	5542	5889	6364	28	14.2	14.8586	14	5581.3
5725	4557	5223	5657	5003	5901	5441	5776	6428	6494	24	16.1	18.7572	18	5620.5
5409	4410	4541	4796	4655	5480	4470	5624	6278	6264	18	17.9	26.0475	26	5192.7
4967	5034	5226	5554	5253	5295	5250	5368	5352	5638	20	14.6	19.6431	20	5293.7
5619	4463	4845	5034	4725	5765	5304	5809	6098	6525	18	9.7	14.5039	14	5418.7
5502	4574	4671	5270	4766	5428	5333	5091	5895	5900	22	15.6	19.4212	20	5243
5138	4817	4736	4874	5288	5676	5506	5575	5594	5886	19	9.7	13.8318	14	5309
5438	4858	5017	5258	5094	5799	5833	5843	6167	6292	19	14.7	20.6235	20	5559.9
5482	4987	5302	5388	5408	5595	5860	5225	5222	5668	19	12.3	17.3772	18	5413.7
5269	4654	4761	5589	4945	5775	5611	5602	5981	6205	18	12.9	19.0464	20	5439.2
5659	5107	5103	5510	5361	5747	5356	5582	5934	5770	64	23.1	17.0967	18	5512.9
5361	4184	4199	4815	4596	5628	4985	5335	6200	6209	11	6.1	15.1367	16	5151.2
5088	4178	4638	4559	4522	5580	4545	5219	6202	6001	29	18.5	18.8983	18	5053.2
5448	4187	4556	4939	4733	5618	4982	5519	5396	6155	25	14.5	16.424	16	5153.3
5897	4759	4751	5603	5115	6149	5303	5964	6218	6285	14	9.7	18.2657	18	5604.4
5455	3989	4469	5034	4082	5329	5036	5089	5888	6399	28	16	16.7317	16	5077
4843	5106	5406	5274	5274	5414	5723	5293	5324	5474	30	14.7	14.7	14	5313.1
5430	4181	4531	5178	4735	5552	4794	5684	6131	6103	42	21	17.6286	18	5231.9
5400	5150	5231	5370	5361	5660	5486	5552	5754	5806	31	15.2	14.8914	14	5477
6072	5157	5562	6049	5640	6077	6334	6062	6479	6708	35	20.2	18.4923	18	6014
5222	5231	5690	5504	5155	5766	5615	5507	5763	5829	19	15	21.0278	22	5528.2
5531	4344	4561	5099	4196	5030	4825	5576	6065	6353	32	19.5	18.7602	18	5158
5418	4394	4718	5140	4723	5485	5197	5565	6208	6405	10	4.4	12.4627	12	5325.3
5545	5455	5460	5481	5029	5743	5286	5706	5184	5777	21	11.1	14.4764	14	5466.6
5152	5042	4931	5021	4942	4957	4910	5147	5141	5378	21	14.3	18.5099	18	5062.1
6120	5302	5392	5847	5810	5860	5704	5846	6320	6208	11	5	12.6445	12	5840.9
4970	4858	4719	4870	5356	5556	5000	5136	5841	5939	10	3.8	10.9311	10	5224.5
5459	5272	5433	5496	5686	6088	5696	6013	5929	6202	14	13	23.9848	24	5727.4
5391	5250	5298	5558	5930	6020	5493	6054	5839	6196	18	12.3	18.1989	18	5702.9
5855	4725	5404	5915	5333	6096	5856	5872	6526	6588	36	20	18.0389	18	5817
5376	5001	5348	4976	5755	5386	5783	6229	6074	6406	17	13.3	20.6018	20	5633.4
5174	5047	5085	4990	4779	4998	5231	5471	5761	5569	18	11.7	17.3496	18	5210.5
5821	5847	5924	6018	6090	6355	6222	6599	6410	6397	17	12.8	19.8653	20	6168.3
5616	4680	4836	4688	5010	5378	5110	5422	5950	6018	27	16.2	17.3596	18	5270.8
4666	4828	4571	5076	4979	5419	4803	5214	5550	5609	20	10.3	14.0244	14	5071.5
5547	4321	4490	5006	4541	5318	4895	5418	6217	6132	15	9.9	17.4518	18	5188.5
5537	5763	5983	5818	5984	6476	6303	6386	6377	6555	27	14.9	15.9774	16	6118.2
6035	4968	5521	5984	5803	6175	5963	6440	6317	6658	48	18	14.2888	14	5986.4
5633	4194	4867	5362	4727	5584	4850	5814	6331	6162	12	6.1	13.8519	14	5352.4
5623	4320	4619	5176	4551	5610	4633	5747	6423	6397	31	17.9	17.5434	18	5309.9
5233	4073	4298	4781	4376	5394	4708	5471	5936	6169	12	4.9	11.3385	12	5043.9
5553	4554	4784	5619	4799	5706	4899	5399	6193	6445	11	6.8	16.6999	16	5395.1
5486	4630	5258	5486	5362	5537	5884	5694	6062	6272	19	14.1	19.814	20	5567.1
5799	4884	5221	5657	5473	5481	5606	5855	5726	6398	16	12.4	20.3374	20	5610
4362	4658	4981	4997	4822	5189	5357	5155	5598	5482	70	24.9	18.1962	18	5060.1
5549	4185	4697	5222	4606	5516	4915	5292	6189	6342	51	19.2	14.9611	14	5251.3
5714	4631	5095	5489	5217	6258	5527	5840	6225	6174	19	14.2	19.949	20	5617
5602	4314	4206	5114	4706	5761	5166	5638	6097	6361	28	16.6	17.3558	18	5296.5
5286	4304	4665	4686	4798	5114	4565	5319	5221	4941	14	11.4	21.2264	22	4889.9
5622	4273	4828	5238	4448	5477	5347	5068	6415	6328	32	16.5	15.8618	16	5304.4
5608	4423	4410	5078	4897	5870	5227	5625	6106	6622	22	19	23.5355	24	5386.6
7803	6277	7073	7441	7099	8328	7118	8394	8372	9082	10	3.2	9.37367	10	7698.7
5484	4792	5074	5393	4777	5877	5545	5647	6324	6194	69	25.6	18.7698	18	5510.7
5774	4962	5661	5460	5659	5971	5616	5952	6161	6382	17	10.3	16.1599	16	5759.8
6101	5816	5970	5989	6171	6343	6001	6577	6687	6796	19	14.2	19.949	20	6245.1
5082	5774	5911	5803	5950	5772	5914	6233	6604	6576	16	11.2	18.4744	18	5961.9
5413	4524	4556	5233	4581	5891	5023	5762	6011	6195	11	6.1	15.1367	16	5318.9
5626	3819	4710	5319	4191	5082	5272	5111	6065	6489	13	6.9	14.3142	14	5168.4
5752	4666	4760	5638	4766	5743	5478	5650	6424	6463	12	8.9	19.5641	20	5534
5282	4469	4475	4938	4884	5785	4873	5882	6372	6199	22	13.4	16.7471	16	5315.9
5127	4273	4502	4934	4576	5322	4917	5053	4714	5370	14	12.2	22.6088	22	4878.8
5797	5529	5777	6076	5810	6182	5774	6166	6428	6458	31	17.5	17.1504	18	5999.7
4974	4952	4808	4867	4719	5432	4877	5140	5363	5175	24	13.2	15.4331	16	5030.7
5551	4078	4795	5018	4653	5778	5216	5755	6293	6345	23	17.4	20.8891	20	5348.2
5789	4509	4833	5231	4796	5310	5431	4998	5865	6601	12	6.3	14.2664	14	5336.3
5557	4461	4417	5121	5046	5881	5064	5747	6198	6391	40	17.6	15.0455	16	5388.3
4982	4899	4958	4923	4861	5356	4990	5146	5233	5467	19	9.7	13.8318	14	5081.5
4899	5100	5200	5561	5196	5362	5585	5370	5836	5142	24	14.4	16.81	16	5325.1
5608	4201	4716	4983	4877	5437	5045	5554	6297	6315	30	17.4	17.4	18	5303.3
5279	4337	4480	5512	4269	5438	5256	5338	6178	6310	28	19	19.8511	20	5239.7
5709	4507	4903	5637	5387	6041	5160	5659	6050	6623	17	12.5	19.4227	20	5567.6
5200	4798	5094	5186	4962	5450	5238	5514	5789	6058	29	13.3	13.5977	14	5328.9
5658	5217	5082	5429	5649	5852	5374	5677	5827	5506	25	16.8	18.989	18	5527.1
5499	4342	4704	4994	4886	5963	5009	5828	6129	6208	25	19.2	21.6601	22	5356.2
4817	4216	4476	5144	4440	5058	4937	5119	6004	5973	22	16.8	20.8757	20	5018.4
5784	7364	7759	8240	7904	9052	8435	8618	8495	9216	15	13.1	22.6913	22	8086.7
5514	4335	4300	4441	4350	5498	4976	5838	5686	5760	18	17.8	25.9085	26	5069.8
5688	5128	4939	5071	5485	5585	5186	5206	5962	5796	20	12.1	16.3846	16	5404.6
5369	4201	4548	4693	4376	5517	4475	5593	6294	5555	19	16.2	22.6418	22	5062.1
5498	5617	5810	5946	5846	6320	6200	6223	6554	6790	19	10.9	15.4722	16	6080.4
5606	4361	4254	5295	4757	5772	4762	5629	6417	6453	16	10.7	17.6949	18	5330.6
6106	5753	5970	5838	5735	6313	5862	6515	6426	6534	17	12.4	19.275	20	6105.2
5786	4333	5125	5479	4890	5748	5660	5562	6198	6383	21	12.6	16.3709	16	5516.4
5670	4992	4806	5694	5252	5677	5385	5539	5972	6367	17	13.3	20.6018	20	5535.4
5492	4079	4552	4956	4194	5435	4531	5434	5956	5976	13	7.5	15.4586	16	5060.5
5710	4781	5031	5511	5013	6062	5522	5965	6156	6380	13	11.6	23.1145	24	5613.1
5764	5092	5097	5992	5529	6171	5720	6067	6213	6521	18	16.6	24.2367	24	5816.6
5632	4957	4943	5234	5171	5543	5322	5305	6003	5670	17	14.5	22.3638	22	5378
5221	4062	4474	4748	4489	5577	4724	5885	5690	5916	12	6.1	13.8519	14	5078.6
5612	4282	4591	5391	4397	5331	4981	5653	6011	6418	20	11.8	15.9921	16	5266.7
5669	5690	5762	5584	5858	6150	5998	6026	6516	6038	19	10.4	14.7896	14	5929.1
5497	4062	4471	4780	4516	5616	4939	5817	5808	6203	14	8.3	15.8003	16	5170.9
6264	5385	5498	6162	5565	6358	6082	6414	6517	6591	10	4.3	12.2091	12	6083.6
5730	4379	4424	5056	4963	5869	5009	5371	5976	6211	64	16.8	12.2896	12	5298.8
5744	5649	5808	5623	5667	6107	5836	5705	6452	5738	14	10.7	20.0113	20	5832.9
5463	6188	6717	7156	6662	7429	7594	6914	7755	8422	19	15	21.0278	22	7030
5086	4958	5216	5021	4979	5290	5292	5309	5682	5433	22	14.4	17.9639	18	5226.6
5774	5974	6000	6112	6012	6803	6602	6936	7059	7043	17	13.3	20.6018	20	6431.5
5638	5350	5465	5726	5536	5764	5916	5624	6065	6093	23	9.7	11.7925	12	5717.7
5855	5393	6045	6055	5858	6457	6386	6172	6382	6080	29	18.7	19.1021	20	6068.3
5376	4902	4596	5059	5171	5156	5447	5524	5629	5705	26	8.8	9.74497	10	5256.5
5332	5342	5050	5360	5174	5790	5158	5708	5775	5819	32	19.6	18.8568	18	5450.8
5577	4241	4676	5211	4802	5249	4858	5058	6254	6023	33	18.9	17.8607	18	5194.9
5896	5078	5375	5833	5609	6102	6030	5922	6526	6161	40	20.4	17.4868	18	5853.2
5711	5192	5192	5977	5536	6254	5852	6062	5961	6433	26	15.2	16.7302	16	5817
6283	5581	5694	5716	5904	5850	6506	5670	6571	6133	14	10.3	19.3145	20	5990.8
5074	5016	4943	5362	4958	5516	5188	5333	5414	5202	22	11.5	14.4286	14	5200.6
5674	4853	4761	5415	5332	6226	5543	5972	6251	6536	21	14.7	19.0121	20	5656.3
5686	3990	4127	4770	4720	5746	4945	5697	6098	5931	25	14.1	15.9773	16	5171
4786	4989	5218	5173	5174	5776	5508	5450	5998	5917	24	14	16.3513	16	5398.9
5572	4244	4815	5438	4466	5286	4861	5413	6188	6386	20	13.1	17.6905	18	5266.9
5429	5182	4826	5082	5543	5565	5426	5803	5858	5761	19	14.9	20.8931	20	5447.5
5177	5182	5366	5056	5772	5853	5305	6027	5836	5856	18	16	23.3989	24	5543
4834	5107	5303	5700	5194	5687	5413	4973	5739	5715	6	4.7	22.6534	22	5366.5
5394	4379	4964	4950	5219	5755	5067	5823	6113	6003	14	13.6	25.0129	26	5366.7
5238	4536	4557	5127	5006	6257	5231	5932	6407	6347	31	18.7	18.3293	18	5463.8
5543	4110	4482	4866	4707	5471	4833	5363	5830	6008	29	14.6	14.9233	14	5121.3
8541	8013	8116	8698	7766	9132	8695	8669	9079	9343	16	13.7	22.3443	22	8605.2
6149	5024	5781	6200	5638	6239	6080	6116	6327	6384	27	16.3	17.4659	18	5993.8
5559	4426	4537	5132	4964	5775	4911	5873	5885	6375	35	16.2	14.7958	14	5343.7
5784	5032	5160	5498	5398	6041	5840	6230	5910	6439	22	13.8	17.2341	18	5733.2
5723	4488	4389	5291	5006	5974	5329	5719	5823	6483	10	4.3	12.2091	12	5422.5
5642	4338	4655	5260	4983	5785	4838	5653	6004	6265	33	20.5	19.3834	20	5342.3
5533	4400	4585	5302	4790	6092	5173	5558	6154	6120	14	14.1	25.8673	26	5370.7
5957	5396	5231	5209	5882	5678	6162	6081	6030	6542	19	7.9	11.3559	12	5816.8
6021	4895	5664	5964	5713	6245	5762	6092	5720	5968	15	15.4	26.4063	26	5804.4
5150	5478	5057	5609	5409	5670	5938	5334	6309	5862	19	16.1	22.5074	22	5581.6
5606	5288	5303	5404	5385	5539	5890	5634	5277	6109	35	18.3	16.7354	16	5543.5
6016	4825	5257	5980	5581	6136	5688	6227	6398	6598	47	20	16.0422	16	5870.6
6243	5024	5002	5229	5692	5476	5234	5282	5975	5936	16	12.8	20.9561	20	5509.3
5446	4481	4354	5022	4845	5837	4606	5763	6282	6443	24	11.3	13.2483	14	5307.9
5492	5098	4680	4875	4994	6032	5627	5124	6218	6020	11	4.3	11.0317	12	5416
5450	4836	5114	5621	5148	5467	5907	5492	6279	6278	31	19.5	19.1154	20	5559.2
8072	4161	4693	5305	4443	5676	4816	5487	5988	6344	16	10.7	17.6949	18	5498.5
4810	4800	5143	5232	5005	5534	5354	5581	5333	5938	39	15.1	13.0289	14	5273
5474	4293	4271	4739	4306	5307	4993	5532	5976	6124	13	4.3	9.25353	10	5101.5
5803	5076	5604	6014	5547	6404	5865	5997	6367	6595	16	14.6	23.7275	24	5927.2
5111	4682	4982	4956	4823	5254	5484	5165	6044	5626	19	13.1	18.4618	18	5212.7
6166	5231	5742	5270	5659	5938	6057	6525	6087	5931	16	13.7	22.3443	22	5860.6
5426	4220	4238	4646	4565	5765	4490	5603	6213	5755	19	11.5	16.2897	16	5092.1
5519	4293	4513	5055	4234	5636	5167	5309	6372	5948	16	10.4	17.2262	18	5204.6
5086	4958	5216	5021	4979	5290	5292	5309	5682	5433	22	12.5	15.65	16	5226.6
4837	5096	5271	5315	5038	5510	5310	5629	5823	5610	21	12.1	15.7402	16	5343.9
5969	5919	6005	6091	5710	6260	6088	5977	6146	6233	30	19.3	19.3	20	6039.8
5271	4148	4233	4757	4735	5921	4552	5489	5549	6157	16	10	16.6001	16	5081.2
5620	5552	5738	5924	5667	5801	5934	5634	6101	6121	29	19.3	19.7135	20	5809.2
5366	4349	4494	5039	5090	5520	5194	5803	6126	6487	25	11.3	12.8453	12	5346.8
5618	4262	4762	5169	4464	5492	5164	5376	6039	6273	21	15.6	20.1405	20	5261.9
5308	4157	4350	4624	4466	5553	4376	5759	6091	5980	29	17.6	17.9812	18	5066.4
5487	5138	5014	5284	5333	5502	5283	5327	5759	5818	29	11.6	11.8638	12	5394.5
5500	4332	4654	5416	4592	5644	5335	5636	6198	6365	17	12.8	19.8653	20	5367.2
8502	5053	5053	5950	5608	6376	6032	6012	6100	6458	27	19	20.3339	20	6114.4
5585	7835	8124	8328	7880	8839	8920	8355	9250	9182	42	15.8	13.1841	14	8229.8
5607	5666	5822	5830	5952	6385	6118	6584	6531	6607	23	14.5	17.4761	18	6110.2
5366	4373	4479	5175	4682	5617	4915	5809	6119	6331	19	12.6	17.7842	18	5286.6
5666	5462	5530	5502	5304	5900	5893	5600	6313	6186	28	13.8	14.4422	14	5735.6
5997	5518	5538	6030	5324	5546	6050	5693	6231	5915	26	17.8	19.5576	20	5784.2
4997	5284	5194	5287	5197	5497	5125	5398	4995	5365	25	15.5	17.5399	18	5233.9
5473	4807	4787	5516	5197	6168	5463	5968	6078	6468	20	14.5	19.5132	20	5592.5
5591	6929	6449	7859	7490	8608	7422	8147	8320	8496	16	12.9	21.1107	22	7531.1
5745	4523	4582	5248	4723	6069	4954	5770	5699	6355	30	16.6	16.6	16	5366.8
4664	4849	5019	5230	5122	5105	5210	5125	5221	5462	10	3.8	10.9311	10	5100.7
5766	5450	5578	5500	5552	6084	5439	5919	5794	6186	19	14	19.679	20	5726.8
6038	5153	5604	5567	5757	6145	5777	6080	6450	6227	15	13.6	23.5021	24	5879.8
5469	4603	4811	4934	4601	5399	4742	5137	4660	4922	41	17.7	14.9632	14	4927.8
5256	5408	5252	5382	6192	5694	5691	6347	6373	6544	17	14.5	22.3638	22	5813.9
5618	5470	5542	5769	5471	6054	5698	5952	6154	6295	22	19	23.5355	24	5802.3
4753	5290	5331	5445	5410	5638	5471	5309	5890	5818	26	15.2	16.7302	16	5435.5
5385	4484	4776	5341	4939	5984	5245	5974	6098	6369	35	23	21.0846	22	5459.5
5790	4375	4748	5487	4918	5933	5328	5734	6230	6320	27	20.2	21.6074	22	5486.3
6262	5967	6249	6459	6024	6642	6384	5984	6422	6544	13	13.1	25.8585	26	6293.7
5723	4442	4472	5123	4806	6027	4872	5376	5922	6369	27	16.8	17.9973	18	5313.2
5588	4127	4582	4953	4450	5501	5008	5935	6313	6454	36	17.3	15.5757	16	5291.1
5746	7599	7779	8596	7953	9023	7870	8498	9107	9186	18	12.8	18.9052	18	8135.7
4824	5086	5252	5310	4982	5362	5640	5649	5614	5670	27	16.6	17.7848	18	5338.9
5352	5122	5200	5461	5632	5866	5572	5629	5908	6030	30	23	23	22	5577.2
5321	6796	7099	7696	6909	8239	7717	7404	8815	8976	21	12.8	16.623	16	7497.2
5589	4401	4549	5299	5061	5952	5087	5822	5632	6464	17	12.3	19.1273	20	5385.6
5567	5279	5107	5177	5048	5674	5610	5354	5561	5637	24	14.4	16.81	16	5401.4
6120	5168	5576	6164	5560	6321	6218	6243	6337	6580	36	14.1	12.6626	12	6028.7
5294	4952	5348	5368	5022	5630	5614	5215	4946	5678	37	20.6	18.3305	18	5306.7
5250	5022	5089	5362	5354	5784	5194	5636	5258	5803	52	17.6	13.5953	14	5375.2
5843	4556	4904	5479	4865	5617	5017	5337	6183	6781	14	7.8	14.913	14	5458.2
5729	5234	5235	5749	5250	6344	5590	6138	5715	6178	32	18.8	18.0837	18	5716.2
6220	5237	5217	5892	5434	6140	6126	6239	6171	6457	31	15.2	14.8914	14	5913.3
6154	5257	5750	5899	5325	6267	6257	6463	6587	6775	48	23.5	18.7911	18	6073.4
5019	4878	4871	5021	4956	5413	5002	5337	5642	5506	33	14.9	14.0582	14	5164.5
5402	4422	4416	5371	5123	5992	5006	5631	5950	6370	19	12.3	17.3772	18	5368.3
5553	4187	4017	4753	5080	5300	5014	5951	5548	6374	26	12.1	13.352	14	5177.7
5512	5138	4673	5241	5518	5757	5206	5629	6170	6244	30	15.5	15.5	16	5508.8
5605	4670	4846	5098	5133	5270	5268	5700	6059	5815	36	12.2	10.9367	10	5346.4
5698	5577	5419	5975	5602	5916	6156	6091	6072	5806	28	15.9	16.6276	16	5831.2
5781	4267	4585	5376	4427	5321	5098	5744	6430	6421	24	17.6	20.4722	20	5345
5250	5243	5512	5758	5930	5991	6357	5992	6255	6276	18	12.7	18.7641	18	5856.4
5146	5143	5255	5861	5614	6235	6026	5980	6190	6627	18	16.1	23.5386	24	5807.7
5444	4546	4377	5486	4915	5857	5393	5850	6315	6179	11	6.9	16.9219	16	5436.2
6000	6050	5981	5946	6086	6434	6214	6095	6548	6725	20	11.7	15.8612	16	6207.9
5723	4708	4956	5601	5366	5805	5755	5731	5959	6511	31	16.8	16.4628	16	5611.5
5619	5269	5291	5194	4822	5325	5502	5164	5250	5714	30	16.2	16.2	16	5315
8591	7903	8344	8889	7991	9199	9051	9093	8916	9295	31	14.2	13.9094	14	8727.2
5832	5166	5622	6017	5688	6240	5933	6241	6338	6673	64	29.1	21.7206	22	5975
5347	4109	4222	4798	4690	5783	4807	5634	6244	5836	24	16.6	19.3291	20	5147
5272	5021	5344	5324	4857	5744	5786	5398	5701	6200	12	9.9	21.5639	22	5464.7
5741	5356	5745	5798	5610	6170	5674	5969	5833	5484	28	16.9	17.6678	18	5738
5496	4115	4339	4809	4517	5611	4866	5159	6185	5900	41	18.5	15.6532	16	5099.7
5465	4097	4429	4552	4548	5592	4739	5768	6192	6321	18	18.2	26.4646	26	5170.3
5187	5285	5552	6021	5768	6388	6249	6183	6615	6806	33	19.4	18.3365	18	6005.4
5018	3934	4497	4799	4381	5326	4590	5058	5587	5802	13	12.2	24.2152	24	4899.2
6114	4862	5341	5730	5481	6217	6113	5794	6106	6574	16	11.5	18.9412	18	5833.2
5747	4604	4545	5312	4970	5956	5041	5757	5941	6408	15	14.4	24.7957	24	5428.1
5695	4781	5488	6031	5110	5927	6050	6013	6540	6284	32	22.3	21.4673	22	5791.9
5276	5137	5152	5448	5096	5422	5448	4911	5272	5423	14	8.3	15.8003	16	5258.5
5390	4110	4548	4885	4345	5243	4760	5699	5835	6222	34	22.5	20.9421	20	5103.7
5606	4995	5152	6045	5512	6238	6130	6189	6340	6557	6	5.4	25.4536	26	5876.4
5118	5279	5107	5177	5048	5674	5610	5354	5561	5637	24	14.4	16.81	16	5356.5
5206	5350	5465	5726	5536	5764	5916	5624	6065	6093	24	14.4	16.81	16	5674.5
5198	4173	4177	4269	4602	5649	4634	5698	6210	6171	41	17.4	14.7046	14	5078.1
5582	5466	5546	5581	5438	5945	5486	5992	6142	6096	23	16.6	19.9489	20	5727.4
5883	5624	5621	5776	5402	5925	5866	5855	6211	6159	22	15.5	19.2999	20	5832.2
6017	4442	4693	5033	4623	5646	5291	5215	6320	6389	68	25.4	18.6617	18	5366.9
5462	4984	5250	5178	4965	5691	5441	5312	5837	5834	18	15.1	22.1394	22	5395.4
5383	4392	4546	4720	4858	5784	5176	5238	6251	6446	19	11.4	16.1536	16	5279.4
5687	5411	5714	5556	5451	5842	5458	5925	6139	6167	19	9.3	13.2833	14	5735
5321	4470	4855	4877	4326	5222	5072	5363	6340	6371	17	13.1	20.3073	20	5221.7
5229	4852	5214	4930	5134	5369	5241	5294	5679	6055	26	18.8	20.6437	20	5299.7
5977	4944	5360	5997	5510	6311	6306	6326	6267	6330	18	13	19.1874	20	5932.8
4930	4815	4926	5009	4702	5466	5179	5696	5862	6072	26	14.3	15.7503	16	5265.7
5702	4644	4760	5006	5230	5931	5180	5887	6295	6484	35	19.1	17.4749	18	5511.9
5096	5120	5097	5426	5054	5434	5436	5203	5257	5524	28	12.1	12.6718	12	5264.7
6062	7619	7347	8531	7762	8745	8698	8644	8579	9182	17	13	20.16	20	8116.9
5575	5028	5462	6148	5723	6338	6138	6171	6280	6517	29	16.8	17.1659	18	5938
5679	5771	5431	5720	5608	5957	5874	5932	6485	6254	18	12	17.7745	18	5871.1
5565	4511	5022	5364	5035	5931	5619	5592	6591	6651	15	12.8	22.2038	22	5588.1
5590	3970	4666	4995	4340	5203	4932	4961	6010	6358	32	16.5	15.8618	16	5102.5
5950	5282	5529	5468	5758	5715	5483	6321	6610	6364	16	10.4	17.2262	18	5848
5438	4240	4775	5283	4328	5224	4782	5636	5605	6398	30	16.2	16.2	16	5170.9
5984	4509	4946	5771	5424	6121	5781	5970	6211	6556	19	15.7	21.9699	22	5727.3
5775	4646	4685	5242	4965	5947	5105	5806	6287	6194	19	11.3	16.0174	16	5465.2
5628	4546	4624	5584	4763	5870	5396	5682	6214	6401	19	13.9	19.5439	20	5470.8
6148	5614	5706	5915	5980	6187	6000	6327	6686	6704	12	7.5	16.731	16	6126.7
5996	4825	4936	5732	5187	6182	5784	6219	6397	6771	13	6	12.5827	12	5802.9
5651	4790	5079	4844	4672	5307	5073	5381	5103	5550	26	13.6	14.9877	14	5145
4534	4864	5006	5244	5174	5343	4595	5196	5427	5074	23	15.3	18.419	18	5045.7
5494	5813	5151	5157	5419	6401	5601	6224	6674	5974	20	10.6	14.4187	14	5790.8
4770	5078	4827	5298	5222	5794	5449	5495	6265	6312	14	13.6	25.0129	26	5451
5936	5222	5348	6052	5439	6238	6060	5917	6260	6524	21	16.1	20.7666	20	5899.6
5534	4985	4874	5214	5030	5486	5291	5277	5972	5867	41	19	16.0848	16	5353
5134	4320	4533	4951	4612	4493	4861	5584	6214	6221	16	9	15.0286	16	5092.3
5567	4988	5188	5827	5286	6227	6150	6162	6549	6649	39	19.3	16.7229	16	5859.3
5487	4885	4860	5036	4470	5592	5286	5467	5782	5827	24	17	19.7865	20	5269.2
5202	4957	4862	5210	5230	5580	5327	5631	5527	5967	33	19.1	18.051	18	5349.3
5195	3994	4160	4512	4611	5181	4728	5403	5546	5699	22	13.8	17.2341	18	4902.9
5678	3864	4566	4712	4286	5417	5119	5348	6277	6348	22	15.6	19.4212	20	5161.5
5483	4137	4614	5195	4593	5362	5068	5682	5548	6319	50	19.2	15.0573	16	5200.1
5226	5454	5264	6191	5491	6134	6042	5951	6104	6319	35	10.6	9.63782	10	5817.6
5540	4180	4546	4955	4680	5831	5069	5781	6025	6314	15	13.4	23.178	24	5292.1
8410	5142	5061	5618	5232	5891	5626	5810	5881	6162	18	18.2	26.4646	26	5883.3
5946	5655	5775	5942	5815	6053	5781	6013	6722	6481	28	15	15.6912	16	6018.3
5348	5176	5088	5738	5570	5845	5880	5831	5766	6048	18	12.5	18.4816	18	5629
5641	4843	4874	5426	5405	6118	5345	6060	6316	6341	18	12.1	17.916	18	5636.9
5630	4283	4365	4801	4341	5287	4544	5535	6076	6003	40	18	15.3938	16	5086.5
5534	5034	5011	5183	5562	5428	5325	5879	5847	5382	19	13.3	18.7326	18	5418.5
5271	4287	4412	4932	4548	5619	4738	5414	5979	6201	27	12.9	13.8489	14	5140.1
5666	4183	4665	5314	5039	5674	5302	5352	6122	6457	31	12.1	11.8479	12	5377.4
5198	5147	5407	5418	5266	5898	5465	5893	5954	6214	18	14.7	21.5786	22	5586
5600	4186	4386	4869	4755	5778	4835	5689	6043	6270	18	10.8	16.0719	16	5241.1
5394	3911	4611	4814	4391	5346	4706	5821	6266	6280	29	15.2	15.535	16	5154
5493	4433	4857	5014	4853	5597	4910	5864	5918	6150	17	9.4	14.8154	14	5308.9
5524	4152	4572	4900	4712	5446	4867	5296	6260	6286	27	18.5	19.803	20	5201.5
5547	4894	5006	5114	5550	5788	5238	5591	5725	5912	21	13.1	17.0009	18	5436.5
5534	4319	4498	5212	4990	5758	5056	5556	5960	6318	29	15.9	16.2486	16	5320.1
5673	4334	4335	5250	4560	5460	4960	5599	5967	6524	29	14.4	14.7194	14	5266.2
5626	4036	4837	5401	4285	5605	4986	5354	6073	6342	20	9.7	13.2346	14	5254.5
5597	5052	5298	6093	5608	6112	5950	6055	6403	6285	17	14.2	21.924	22	5845.3
5110	4228	4302	4379	4034	4411	4564	3854	4635	4918	16	13.2	21.5738	22	4443.5
5507	4125	4874	4906	4573	5367	4473	5791	6120	6271	16	14.6	23.7275	24	5200.7
5512	4876	5062	5401	5164	5839	5454	5199	5592	5948	10	3.8	10.9311	10	5404.7
5480	4235	4584	4897	4904	5403	4771	5374	5965	6251	32	23.3	22.4345	22	5186.4
6299	6066	6038	6170	6294	6512	6294	6561	6987	6921	19	11.8	16.6979	16	6414.2
5462	4674	4864	5347	4977	5768	5490	5943	6134	6555	13	9.4	19.0386	20	5521.4
4992	5160	5024	5344	5366	5429	5002	5651	6095	5935	33	16.2	15.2933	16	5399.8
5163	5410	5683	5748	5536	6046	5773	5853	6353	6247	32	14.3	13.7378	14	5781.2
5823	5129	5408	6064	5141	6130	6342	5884	6171	6621	29	14.8	15.1272	16	5871.3
5485	5429	5591	5600	5741	6090	5942	6114	6192	6389	17	11.7	18.2398	18	5857.3
5563	3977	4570	4842	4643	5445	4722	5521	6173	6255	26	10.4	11.4954	12	5171.1
5514	4642	4949	5197	5218	5689	5322	5463	5259	5558	28	13.6	14.234	14	5281.1
5734	4154	4373	5026	4535	5455	4879	5514	6072	6200	29	19.2	19.6116	20	5194.2
5659	5690	5583	5945	5601	5815	6169	5915	6043	6144	6	4.9	23.4599	24	5856.4
5779	5678	5565	6065	5751	6131	6137	5813	5973	5964	21	10.7	13.97	14	5885.6
5384	4540	4772	5094	5007	5985	5104	5220	5958	6423	17	10.3	16.1599	16	5348.7
5262	4041	4408	4949	4602	5383	4656	5539	5991	6371	22	20.1	24.8624	24	5120.2
4460	3145	3460	3837	3653	4120	3500	3557	3834	3579	13	7.5	15.4586	16	3714.5
5485	4395	4801	5381	4458	5472	5348	5449	6263	5921	20	19.3	25.7196	26	5297.3
5650	5464	5420	5545	5192	5977	5556	5751	6061	6019	28	12.8	13.4009	14	5663.5
6099	5197	5616	5617	5734	6244	6230	5908	6607	6648	24	15.4	17.9559	18	5990
8107	4138	4556	5265	4541	5782	5118	5499	6119	6043	24	17.6	20.4722	20	5516.8
5662	4815	5240	5286	5605	5786	5843	5641	5996	6100	21	12.8	16.623	16	5597.4
5626	4399	4776	5491	4896	5658	5025	5344	6473	6533	21	13.4	17.3785	18	5422.1
5619	4151	4401	5143	4428	5556	5162	5364	6162	6481	16	13.1	21.4195	22	5246.7
5650	5514	5830	5895	5860	5978	6350	6023	6025	6220	19	15	21.0278	22	5934.5
5278	4913	4990	5413	5074	5538	5758	5634	5911	5777	30	20.8	20.8	20	5428.6
5308	4157	4350	4624	4466	5553	4376	5759	6091	5980	18	10.3	15.3601	16	5066.4
5984	5562	5895	6240	5811	6429	6334	6260	6809	6362	20	17.2	23.0117	24	6168.6
5174	5134	5164	5093	5238	5496	5105	6019	5451	6241	26	11.4	12.5879	12	5411.5
5470	4552	5160	5064	5093	5254	5538	5242	5825	5870	20	13.6	18.3422	18	5306.8
5258	4718	4947	4658	4925	5316	5298	5510	5942	5744	24	16.9	19.6722	20	5231.6
5535	4550	5039	5498	4646	5457	5295	5668	5840	6390	20	12	16.2538	16	5391.8
5345	4563	4283	5034	4267	5126	4988	5194	6061	6289	17	10	15.7124	16	5115
5618	4173	4377	4992	4686	5418	4782	5749	6356	6019	18	12.2	18.0575	18	5217
5556	4957	5425	5388	5336	5394	5602	5507	5722	5969	21	16	20.6414	20	5485.6
5087	5444	5472	5549	5320	5647	5950	5564	5744	5889	20	13.6	18.3422	18	5566.6
5399	4362	4840	5220	4366	5251	4775	5290	6112	5765	22	11.3	14.184	14	5138
5562	5051	4844	5049	4839	5501	4976	5164	5226	5292	34	19.1	17.7522	18	5150.4
5394	4318	4619	4973	4464	5467	5013	5403	5992	6425	20	15	20.1626	20	5206.8
5639	4840	4960	5420	5166	5958	5650	5776	6310	6529	22	14.1	17.5991	18	5624.8
5382	4414	4600	5117	4229	5438	4818	5554	6242	6038	19	16.8	23.447	24	5183.2
6062	4865	4876	5460	4724	5858	5785	5438	6104	6411	12	7.3	16.3228	16	5558.3
4978	4737	4964	5212	5330	5795	5256	5675	5753	5769	34	12.8	11.8553	12	5346.9
5891	5444	5482	5614	5694	5570	6103	6005	5886	6398	18	15.9	23.2591	24	5808.7
8734	7718	7873	8155	8130	9136	8330	8618	9171	8949	21	19.4	24.8848	24	8481.4
5462	4220	4480	5234	4821	5596	5170	5613	6179	6142	20	11.8	15.9921	16	5291.7
5593	4668	4876	5138	4906	5723	5346	5989	6248	6671	16	10.4	17.2262	18	5515.8
6125	5421	5640	6169	5748	6317	6094	6507	6025	6854	33	17.2	16.2439	16	6090
5450	4205	4416	4953	4668	5569	4976	5716	6138	6299	19	16.6	23.1787	24	5239
5605	4434	4521	4915	4315	5494	4916	5944	5678	6247	31	16.1	15.7753	16	5206.9
8414	7678	8017	8221	8140	8999	8805	8626	9048	9249	21	10	13.0823	14	8519.7
5036	4290	4544	4405	4388	4544	4262	4653	4966	4904	19	14	19.679	20	4599.2
5425	4095	4422	4703	4753	5555	4769	5595	5710	5715	22	14.7	18.3285	18	5074.2
5738	5069	5496	6203	5637	6409	5955	5841	6065	6815	14	13.2	24.3279	24	5922.8
5547	4321	4490	5006	4541	5318	4895	5418	6217	6132	22	16.9	20.9968	20	5188.5
5524	4576	4691	5206	5168	6101	5141	5785	6076	6445	22	11.4	14.3063	14	5471.3
5538	5373	5538	5435	5587	5575	5390	6098	6285	6226	22	19.5	24.1388	24	5704.5
5556	4533	4385	4836	5074	5764	4756	5718	6079	6522	19	11.3	16.0174	16	5322.3
5502	4897	5057	5835	5529	6084	5888	5732	6027	6458	18	13	19.1874	20	5700.9
6197	5032	5298	5231	5750	5787	5836	6137	6012	6201	19	13.6	19.1384	20	5748.1
5853	5085	5220	5319	5657	5436	5333	5889	5788	6383	23	17.5	21.0066	22	5596.3
5553	4373	4535	5099	5196	5836	4978	5331	5792	6574	16	13	21.2651	22	5326.7
5024	4527	5194	5336	5637	5238	5455	5424	5490	6099	17	11.7	18.2398	18	5342.4
5196	4135	4445	4670	4378	5337	4749	5341	5709	5774	27	15.7	16.8281	16	4973.4
8057	6737	6982	7968	7092	8009	7486	8101	8966	8973	21	15.4	19.8899	20	7837.1
5158	5139	5106	5204	5129	5538	5022	5245	5364	5913	23	18.1	21.7111	22	5281.8
5794	5828	5966	6088	5930	6243	5774	6154	6609	6536	18	10.9	16.2141	16	6092.2
5761	5121	5765	5554	5454	5413	5143	5842	5886	5898	20	18.5	24.6892	24	5583.7
5030	4484	4466	4704	4438	4972	4607	5006	4992	5007	41	15.3	12.897	12	4770.6
[truncated: 4,837 more rows]
